# Supplementary material for: Palladium-catalyzed intermolecular alkynylcarbonylation of unactivated alkenes: easy access to β-alkynylcarboxylic esters
Source: Royal Society of Chemistry journal article supplement (doi:10.1039/d1cc07092d), 2022-01-01
Supplement: d1cc07092d1.pdf [file d1cc07092d1.pdf]

## Supporting Information

for

# **Palladium-Catalyzed Intermolecular Alkynylcarbonylation of Unactivated Alkenes: Easy Access to $\beta$ -Alkynylcarboxylic Ester**

Xiang Li, Pinhong Chen\* and Guosheng Liu\*

State Key Laboratory of Organometallic Chemistry and Shanghai Hongkong Joint  
Laboratory in Chemical Synthesis, Center for Excellence in Molecular Synthesis,  
Shanghai Institute of Organic Chemistry, University of Chinese Academy of  
Sciences, Chinese Academy of Sciences, Shanghai 200032, China

*Email:* pinhongchen@sioc.ac.cn, gliu@mail.sioc.ac.cn

## Table of Contents

|                                                                                                                        |      |
|------------------------------------------------------------------------------------------------------------------------|------|
| <b>1. General consideration</b> .....                                                                                  | S2   |
| <b>2. Experiments section</b> .....                                                                                    | S2   |
| 2.1 Synthesis of alkene substrates and EBX reagents .....                                                              | S2   |
| 2.2 General procedure for alkynylcarbonylation of unactivated alkenes.....                                             | S2   |
| 2.3 Scale-up reaction .....                                                                                            | S3   |
| 2.4 Reaction with nitrogen contain nucleophiles .....                                                                  | S3   |
| 2.5 Synthetic applications .....                                                                                       | S3   |
| 2.6 Mechanical experiments.....                                                                                        | S8   |
| <b>3. X-Ray structures</b> .....                                                                                       | S13  |
| <b>4. New compounds characterization</b> .....                                                                         | S14  |
| <b>5. <math>^1\text{H}</math> NMR, <math>^{13}\text{C}</math> NMR and <math>^{19}\text{F}</math> NMR spectra</b> ..... | S31  |
| <b>6. Supplementary reference</b> .....                                                                                | S120 |

### **1. General Consideration.**

$\text{Pd}(\text{CH}_3\text{CN})_4(\text{BF}_4)_2$  was purchased from Strem Chemical, other commercial reagents with high purity were purchased and used without further purification, unless otherwise noted.  $^1\text{H}$ ,  $^{19}\text{F}$  and  $^{13}\text{C}$  NMR spectra were recorded on an Agilent-400 MHz and Bruker-400 MHz spectrometer. The chemical shifts ( $\delta$ ) are given in parts per million relative to internal standard  $\text{CDCl}_3$  (7.26 ppm for  $^1\text{H}$ ),  $\text{CDCl}_3$  (77.0 ppm for  $^{13}\text{C}$ ).  $^1\text{H}$  and  $^{19}\text{F}$  multiplicities are reported as follows: singlet (s), doublet (d), doublet of doublets (dd), quartet (q), multiplet (m), and broad resonance (br). Flash column chromatography was performed on silica gel (particle size 230-400 mesh, purchased from Canada) and eluted with petroleum ether/ethyl acetate or dichloromethane/ethyl acetate. High Resolution Mass spectral data were obtained on a Waters Micromass GCT spectrometer in EI mode or on Agilent Technologies 6224 TOF LC MS spectrometer in ESI mode.  $\text{CH}_3\text{CN}$  and DCM were dried by refluxed with  $\text{CaH}_2$ .

## 2. Experiments section.

### 2.1 Preparation of alkene and EBX reagents.

Alkene substrates **1c**, **1d**, **1f**, **1p** and **1u** were commercial available. And other alkenes and EBX reagents were prepared according to literature reports.<sup>1-4</sup>

### 2.2 General procedure for alkynylcarbonylation of alkenes.

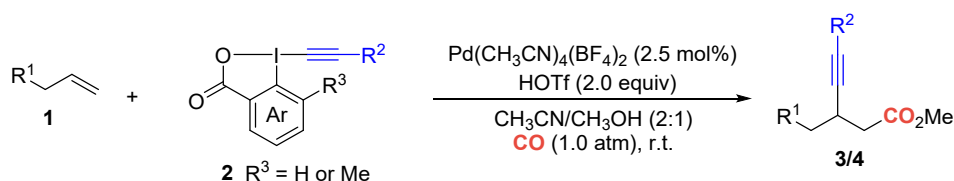

In an oven-dried 10.0 mL Schlenk tube, alkene substrate **1** (0.2 mmol, 1.0 equiv.) and EBX reagent **2** (0.4 mmol, 2.0 equiv.) were dissolved in a mixed solvent  $\text{CH}_3\text{CN}$ /toluene (2.0 mL,  $v/v$  2:1) at room temperature under a CO atmosphere (1.0 atm). And then, HOTf (35.0  $\mu\text{L}$ , 0.4 mmol, 2.0 equiv.) and  $\text{Pd}(\text{CH}_3\text{CN})_4(\text{BF}_4)_2$  (50.0  $\mu\text{L}$ , 0.1 M in  $\text{CH}_3\text{CN}$ , 0.005 mmol, 2.5 mol%) were added to the reaction mixture. The reaction was stirred at room temperature and monitored by TLC. After the alkene substrate was consumed, the solvent was removed under vacuum, and the residue was purified by column chromatography on silica gel with a gradient eluent of petroleum

ether and ethyl acetate to afford products **3** or **4**. The results were shown in Table 2.

### 2.3 Scale-up reaction.

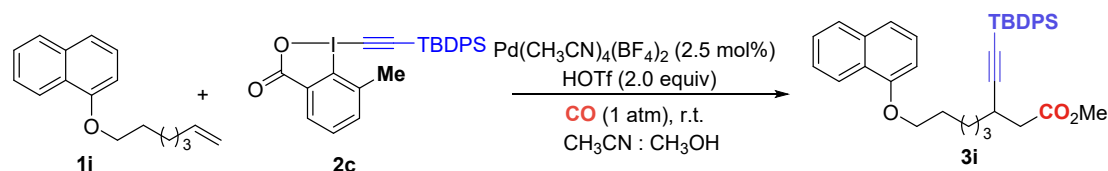

In an oven-dried 200.0 mL Schlenk bottom, alkene substrate **1i** (0.7 g, 3.0 mmol, 1.0 equiv.) and EBX reagent **2c** (2.4 g, 4.5 mmol, 1.5 equiv.) were dissolved in a mixed solvent  $\text{CH}_3\text{CN}/\text{MeOH}$  (25.0 mL, v/v 2:1) at room temperature under a CO atmosphere (1.0 atm). And then, HOTf (0.4 mL, 6.0 mmol, 2.0 equiv.) and  $\text{Pd}(\text{CH}_3\text{CN})_4(\text{BF}_4)_2$  (75.0  $\mu\text{L}$ , 1 M in  $\text{CH}_3\text{CN}$ , 0.075 mmol, 2.5 mol%) were added to the reaction mixture. The reaction was stirred at room temperature and monitored by TLC. After the alkene substrate was consumed, the solvent was removed under vacuum, and the residue was purified by column chromatography on silica gel with a gradient eluent of petroleum ether and ethyl acetate (10:1 to 3:1) to afford products **3i** ( $R_f = 0.61$ , PE:EA = 3:1) (1.08 g, 75% yield) .

### 2.4 The reactions with nitrogen nucleophiles."

**Table S1** The reactions with nitrogen nucleophiles.

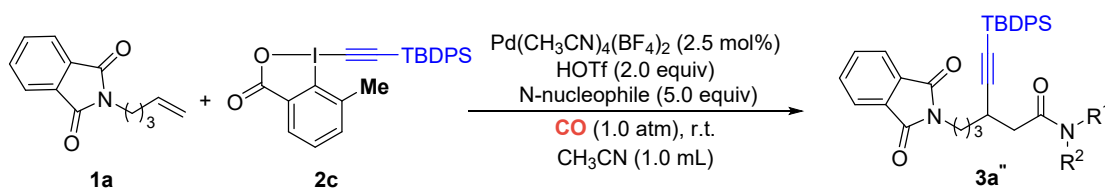

| Entry | N-nucleophile              | <b>1a</b> (%) | <b>3a''</b> (%) |
|-------|----------------------------|---------------|-----------------|
| 1     | $\text{CH}_3\text{ONH}_2$  | 100           | 0               |
| 2     | $\text{CH}_3\text{CONH}_2$ | 26            | 0               |
| 3     | $\text{PhONH}_2$           | 70            | 0               |
| 4     | $n\text{-BuNH}_2$          | 22            | 0               |
| 5     | $\text{BnNH}_2$            | 68            | 0               |
| 6     | $\text{BnNHCH}_3$          | 87            | 0               |
| 7     | cyclohexanamine            | 85            | 0               |

<sup>a</sup> The reactions were ran on 0.1 mmol scale, and yields were taken from  $^1\text{H}$  NMR with  $\text{CF}_3\text{DMA}$  as an internal standard.

## 2.5 Synthetic applications.

### 2.5.1. Palladium-catalyzed cross-coupling reaction.

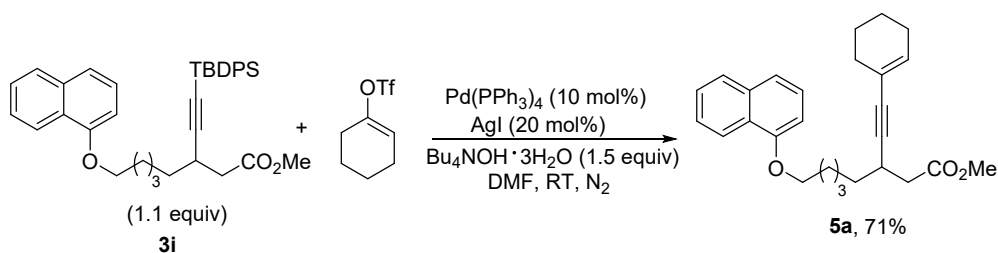

According to literature process.<sup>5</sup>  $\text{Pd}(\text{PPh}_3)_4$  (46.2 mg, 0.04 mmol, 10 mol%) and AgI (18.7 mg, 0.08 mmol, 20 mol%) were weighted to an oven-dried sealed tube in glove-box. Then DMF (0.5 mL), **3i** (0.44 mL, 1 M in DMF, 0.44 mmol, 1.1 equiv.) and cyclohex-1-en-1-yl trifluoromethanesulfonate (0.4 mL, 1 M in DMF, 0.4 mmol, 1.0 equiv.) were added in sequence, and the mixture was stirred for 5 minutes under  $\text{N}_2$  atmosphere. Then,  $\text{Bu}_4\text{NOH} \cdot 3\text{H}_2\text{O}$  (0.6 mL, 1 M in DMF, 0.6 mmol, 1.5 equiv.) was added and the reaction was allowed to stirred at room temperature. When **3i** was consumed, ethyl acetate (10.0 mL) was added and the mixture was washed with water. The combined organic layer was dried over  $\text{Na}_2\text{SO}_4$ , filtered and the filtrate was concentrated under reduced pressure. The residue was purified by column chromatography on silica gel with a gradient eluent of petroleum ether and ethyl acetate

(10:1 to 1:1) to get **5a** ( $R_f = 0.65$ , PE:EA = 3:1) (114.7 mg, 71% yield).  $^1\text{H}$  NMR (400 MHz,  $\text{CDCl}_3$ )  $\delta$  8.28 (d,  $J = 8.0$  Hz, 1H), 7.79 (d,  $J = 7.6$  Hz, 1H), 7.50 – 7.34 (m, 4H), 6.79 (d,  $J = 7.2$  Hz, 1H), 6.00 (s, 1H), 4.14 (t,  $J = 6.4$  Hz, 2H), 3.69 (s, 3H), 3.00 – 2.96 (m, 1H), 2.55 (dd,  $J = 15.6, 7.6$  Hz, 1H), 2.46 (dd,  $J = 15.6, 7.2$  Hz, 1H), 2.06 – 2.05 (m, 3H), 1.98 – 1.90 (m, 2H), 1.61 – 1.46 (m, 11H).  $^{13}\text{C}$  NMR (100 MHz,  $\text{CDCl}_3$ )  $\delta$  172.2, 154.9, 134.5, 133.8, 127.4, 126.3, 125.9, 125.7, 125.0, 122.1, 120.7, 119.9, 104.5, 88.3, 84.0, 67.9, 51.7, 40.2, 34.7, 29.5, 29.2, 28.8, 27.0, 26.0, 25.5, 22.3, 21.5. HRMS:  $m/z$  (ESI) calculated  $[\text{M}+\text{NH}_4]^+$ : 422.2690, measured: 422.2692. IR (neat): 2929, 2857, 1736, 1579, 1389, 1268, 1155, 1099, 791, 770  $\text{cm}^{-1}$ .

### 2.5.2. Click reaction.

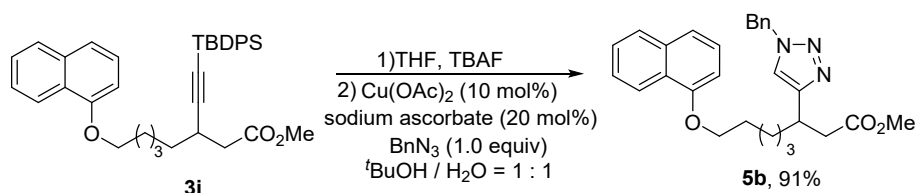

According to literature process.<sup>6</sup> TBAF (0.4 mL, 1 M in THF, 0.4 mmol, 2.0 equiv.) was added to a solution of **3i** (104.2 mg, 0.2 mmol, 1.0 equiv.) in freshly dried THF, and the mixture was stirred at 80 °C for 2 hours under  $\text{N}_2$  atmosphere. When the **3i** was consumed, the reaction was cooled down to room temperature before water (5.0 mL) and ethyl acetate (10.0 mL) were added to the mixture, and the water phase was extracted with ethyl acetate (10.0 mL\*2). The combined organic layer was washed with brine and dried over  $\text{MgSO}_4$ . The filtrate was concentrated under vacuum, and the residue was dissolved with tert-butanol and water (1.0 mL, 1:1) in a 10 mL sealed tube, cupric acetate (3.6 mg, 0.02 mmol, 10 mol%), sodium ascorbate (8.0 mg, 0.04 mmol, 20 mol%) and benzyl azide (26.6 mg, 0.2 mmol, 1.0 equiv.) were added to the solution in sequence. The mixture was reacted at room temperature for overnight. Then, the reaction was diluted with ethyl acetate (10.0 mL), dried over  $\text{MgSO}_4$  and concentrated in vacuum. The residue was purified by column chromatography on silica with a gradient eluent of petroleum ether and ethyl acetate (3:1 to 0:1) gel to get **5b** ( $R_f = 0.32$ , PE:EA:Et<sub>3</sub>N = 3:3:1) (83.2 mg, 91% yield).  $^1\text{H}$  NMR (400 MHz,  $\text{CDCl}_3$ )  $\delta$  8.26 (d,  $J = 7.6$  Hz, 1H), 7.79 (d,  $J = 7.6$  Hz, 1H), 7.50 – 7.32 (m, 7H), 7.20 – 7.17 (m, 3H), 6.76

(d,  $J = 7.2$  Hz, 1H), 5.44 (d,  $J = 15.2$  Hz, 1H), 5.39 (d,  $J = 15.2$  Hz, 1H), 4.07 (t,  $J = 6.4$  Hz, 2H), 3.57 (s, 3H), 3.34 – 3.30 (m, 1H), 2.76 (dd,  $J = 15.6, 8.0$  Hz, 1H), 2.68 (dd,  $J = 16.0, 6.8$  Hz, 1H), 1.91 – 1.70 (m, 4H), 1.60 – 1.50 (m, 2H), 1.36 – 1.32 (m, 2H).  $^{13}\text{C}$  NMR (100 MHz,  $\text{CDCl}_3$ )  $\delta$  172.7, 154.7, 150.3, 134.8, 134.4, 128.9, 128.5, 127.8, 127.4, 126.3, 125.9, 125.6, 125.0, 122.0, 120.9, 119.9, 104.4, 67.7, 53.8, 51.4, 39.5, 34.6, 33.1, 29.1, 26.8, 26.0. HRMS:  $m/z$  (ESI) calculated  $[\text{M}+\text{H}]^+$ : 458.2438, measured: 458.2435. IR (neat): 3141, 2941, 1727, 1582, 1457, 1333, 1206, 778, 724, 694  $\text{cm}^{-1}$ .

### 2.5.3. Hydrolysis of ester.

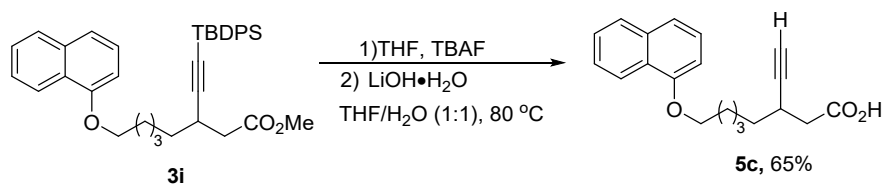

TBAF (2.0 mL, 1 M in THF, 2.0 mmol, 2.0 equiv.) was added to a solution of **3i** (562.3 mg, 1.0 mmol, 1.0 equiv.) in freshly dried THF, and mixture was stirred at 80 °C for 2 hours under  $\text{N}_2$  atmosphere. When the **3i** was consumed (detected by TLC), the reaction was cooled down to room temperature before water (10.0 mL) and ethyl acetate (30.0 mL) were added to the mixture, and the water phase was extracted with ethyl acetate (30.0 mL\*2). The combined organic layer was washed with brine and dried over  $\text{MgSO}_4$ , and concentrated under reduced pressure. The residue was dissolved with THF/ $\text{H}_2\text{O}$  (1:1, 10.0 mL) and lithium hydroxide monohydrate (125.9 mg, 3.0 mmol, 3.0 equiv.) was added to the solution in sequence. The mixture was allowed to react at 80 °C for overnight. After that, the reaction was cooled down to room temperature, HCl (1 M, 10.0 mL) was added to the mixture and extracted with ethyl acetate (20.0 mL\*3). The combined organic phase was washed with brine (40.0 mL) and dried over  $\text{MgSO}_4$ . The filtrate was concentrated under reduced pressure and the residue was purified by column chromatography on silica with a gradient eluent of petroleum ether and ethyl acetate (3:1 to 0:1) gel to get **5c** ( $R_f = 0.44$ , PE:EA = 1:3), (201.8 mg, 65% yield).  $^1\text{H}$  NMR (400 MHz,  $\text{CDCl}_3$ )  $\delta$  10.7 (br, 1H), 8.31 (d,  $J = 9.2$  Hz, 1H), 7.81 (d,  $J = 8.4$  Hz, 1H), 7.52 – 7.36 (m, 4H), 6.81 (d,  $J = 7.2$  Hz, 1H), 4.15 (t,  $J = 6.0$  Hz, 2H), 2.94 – 2.88 (m, 1H), 2.64 (dd,  $J = 15.6, 7.6$  Hz, 1H), 2.54 (dd,  $J =$

16.0, 6.8 Hz, 1H), 2.14 (s, 1H), 1.98 – 1.95 (m, 2H), 1.68 – 1.59 (m, 6H).  $^{13}\text{C}$  NMR (100 MHz,  $\text{CDCl}_3$ )  $\delta$  177.7, 154.7, 134.4, 127.4, 126.3, 125.9, 125.6, 125.0, 122.0, 119.9, 104.5, 85.5, 70.1, 67.8, 39.7, 34.2, 29.1, 27.7, 26.8, 25.9. HRMS:  $m/z$  (ESI) calculated  $[\text{M}+\text{NH}_4]^+$ : 328.1907, measured: 328.1907. IR (neat): 3310, 2958, 1741, 1579, 1389, 1361, 1155, 770  $\text{cm}^{-1}$ .

#### 2.5.4 Gold-catalyzed cyclization reaction.

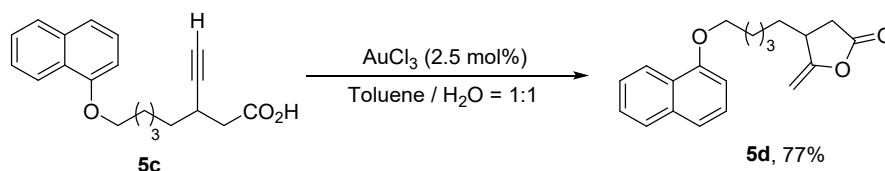

According to literature process.<sup>7</sup>  $\text{AuCl}_3$  (1.2 mg, 0.0035 mmol, 2.5 mol%) and **5c** (43.4 mg, 0.14 mmol, 1.0 equiv.) were dissolved in a mixed solvent (toluene/water, 1:1, 1.0 mL) under  $\text{N}_2$  atmosphere. And the mixture was allowed to react at room temperature for overnight. Then, the mixture was diluted with ethyl acetate (10.0 mL), dried over  $\text{MgSO}_4$  and the filtrate was removed in vacuum. The residue was purified by column chromatography on silica gel with a gradient eluent of petroleum ether and ethyl acetate (20:1 to 5:1) to give **5d** ( $R_f$  = 0.75, PE:EA = 5:1) (33.3 mg, 77% yield).  $^1\text{H}$  NMR (400 MHz,  $\text{CDCl}_3$ )  $\delta$  8.28 (d,  $J$  = 7.6 Hz, 1H), 7.81 (d,  $J$  = 8.4 Hz, 1H), 7.52 – 7.34 (m, 4H), 6.81 (d,  $J$  = 7.6 Hz, 1H), 4.77 (s, 1H), 4.32 (s, 1H), 4.15 (t,  $J$  = 6.4 Hz, 2H), 3.08 – 3.03 (m, 1H), 2.80 (dd,  $J$  = 18.0, 9.6 Hz, 1H), 2.36 (dd,  $J$  = 18.0, 6.0 Hz, 1H), 1.98 – 1.91 (m, 2H), 1.78 – 1.73 (m, 1H), 1.66 – 1.45 (m, 5H).  $^{13}\text{C}$  NMR (100 MHz,  $\text{CDCl}_3$ )  $\delta$  174.1, 160.1, 154.6, 134.4, 127.4, 126.3, 125.9, 125.6, 125.1, 121.9, 120.0, 104.4, 88.4, 67.7, 37.7, 34.1, 29.1, 26.5, 26.1. HRMS:  $m/z$  (ESI) calculated  $[\text{M}+\text{NH}_4]^+$ : 328.1907, measured: 328.1907. IR (neat): 2942, 2862, 2339, 2307, 1806, 1581, 1269, 1125, 1018, 769  $\text{cm}^{-1}$ .

#### 2.5.5. NIS-mediated lactonization.

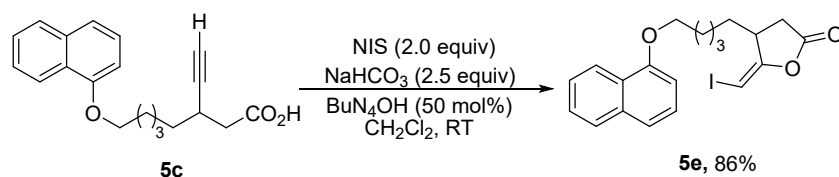

According to literature process.<sup>8</sup> In a 10.0 mL oven-dried sealed tube, **5c** (40.3 mg, 0.13 mmol, 1.0 equiv.) was dissolved in CH<sub>2</sub>Cl<sub>2</sub>, *N*-iodosuccinimide (NIS) (58.5 mg, 0.26 mmol, 2.0 equiv.), sodium bicarbonate (27.3 mg, 0.32 mmol, 2.5 equiv.) and tetrabutylammonium hydroxide (16.9 mg, 0.07 mmol, 50 mol%) were added in sequence. The reaction was stirred vigorously for 30 minutes, H<sub>2</sub>O (10.0 mL) and CH<sub>2</sub>Cl<sub>2</sub> (10.0 mL) were added to the mixture. The organic layer was washed with sodium thiosulfate (5% *aq*) and saturated brine, dried over Na<sub>2</sub>SO<sub>4</sub> and the filtrate was removed in vacuum. The residue was purified by column chromatography on silica gel with a gradient eluent of petroleum ether and ethyl acetate (20:1 to 5:1) to get **5e** (*R*<sub>f</sub> = 0.7, PE:EA = 5:1) (48.8 mg, 86% yield). <sup>1</sup>H NMR (400 MHz, CDCl<sub>3</sub>) δ 8.28 (d, *J* = 7.2 Hz, 1H), 7.80 (d, *J* = 8.4 Hz, 1H), 7.49 – 7.35 (m, 4H), 6.81 (d, *J* = 7.6 Hz, 1H), 5.81 (s, 1H), 4.15 (t, *J* = 6.4 Hz, 2H), 3.23 – 3.21 (m, 1H), 2.85 (dd, *J* = 18.0, 9.2 Hz, 1H), 2.53 (d, *J* = 18.4 Hz, 1H), 1.96 – 1.85 (m, 3H), 1.66 – 1.46 (m, 5H). <sup>13</sup>C NMR (100 MHz, CDCl<sub>3</sub>) δ 173.9, 157.8, 154.7, 134.4, 127.4, 126.3, 125.9, 125.1, 121.9, 120.1, 104.5, 67.7, 53.1, 39.0, 34.0, 32.4, 29.1, 26.0. HRMS: *m/z* (ESI) calculated [M+H]<sup>+</sup>: 437.0608, measured: 437.0602. IR (neat): 2934, 2340, 1705, 1579, 1459, 1267, 1237, 1098, 791, 770 cm<sup>-1</sup>.

## 2.6 Mechanistic investigations.

### 2.6.1 Control experiment.

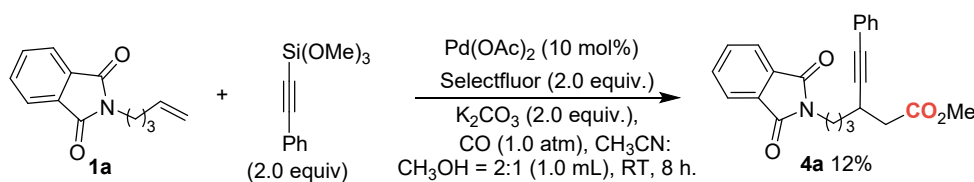

Pd(OAc)<sub>2</sub> (2.3 mg, 0.01 mmol, 10 mol%), alkene substrate **1a** (21.5 mg, 0.1 mmol, 1.0 equiv.), Selectfluor (70.8 mg, 0.2 mmol, 2.0 equiv.) and potassium carbonate (27.6 mg, 0.2 mmol, 2.0 equiv.) were dissolved in a mixed solvent (CH<sub>3</sub>CN/CH<sub>3</sub>OH 2:1, 1.0 mL), and trimethoxy(phenylethynyl)silane (44.4 mg, 0.2 mmol, 2.0 equiv.) was added to the mixture in sequence under a CO atmosphere. Then the reaction was stirred at room temperature for 8 hours. The solvent was removed in vacuum and the residue was

analyzed by  $^1\text{H}$  NMR with  $\text{CF}_3\text{DMA}$  as internal standard. As shown in **figure S1**, product **4a** was obtained in 12% yield with trimethoxy(phenylethynyl)silane as the alkynylation reagent<sup>9</sup>. The result indicated that alkynyl- $\text{Pd}^{\text{II}}$  was involved in the alkynylcarbonylation process.

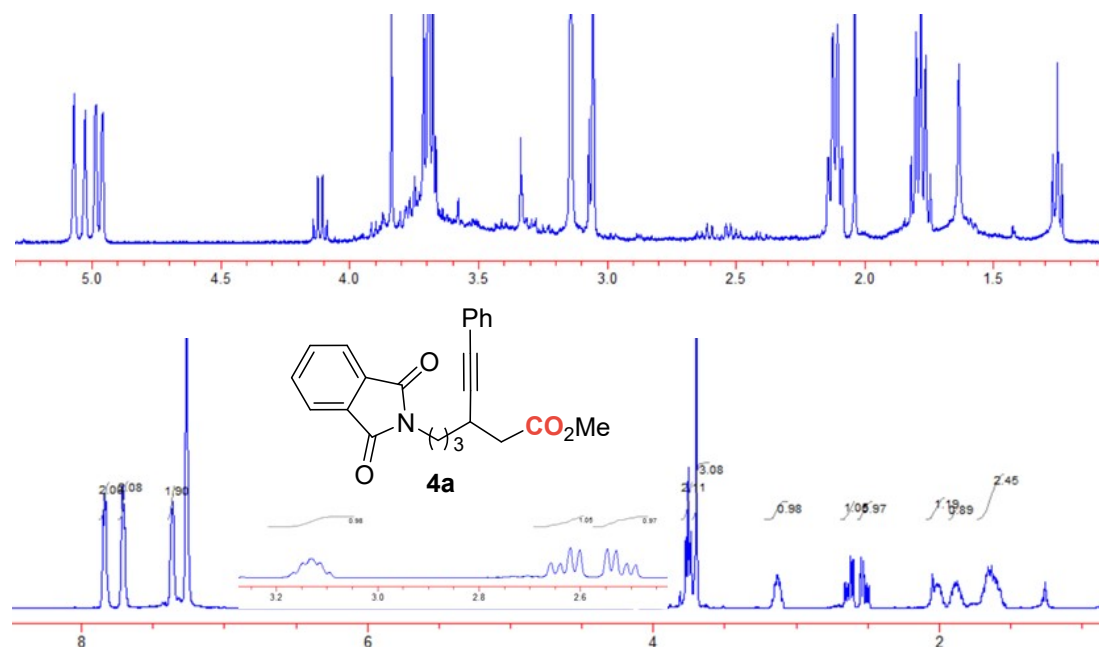

**Figure S1**  $^1\text{H}$  NMR of control experiment

## 2.6.2 Influence of CO pressure.

Alkene substrate **1a** (43.0 mg, 0.2 mmol, 2.0 equiv.), EBX reagent **2c** (52.4 mg, 0.1 mmol, 1.0 equiv.) and a stirring bar were added into a vial (4.0 mL). Then  $\text{CH}_3\text{CN}/\text{CH}_3\text{OH}$  (1.0 mL,  $v/v$  2:1) was injected by syringe. The vial was then transferred into an autoclave (20.0 mL). At room temperature, the autoclave was flushed with CO gas three times and pressurized with CO gas to 2.0 atm, 5.0 atm and 10.0 atm. 8 hours later, the solvent was removed under reduced pressure and  $\text{CDCl}_3$  was added to the residue and the product was detected by  $^1\text{H}$  NMR with  $\text{CF}_3\text{-DMA}$  as an internal standard.

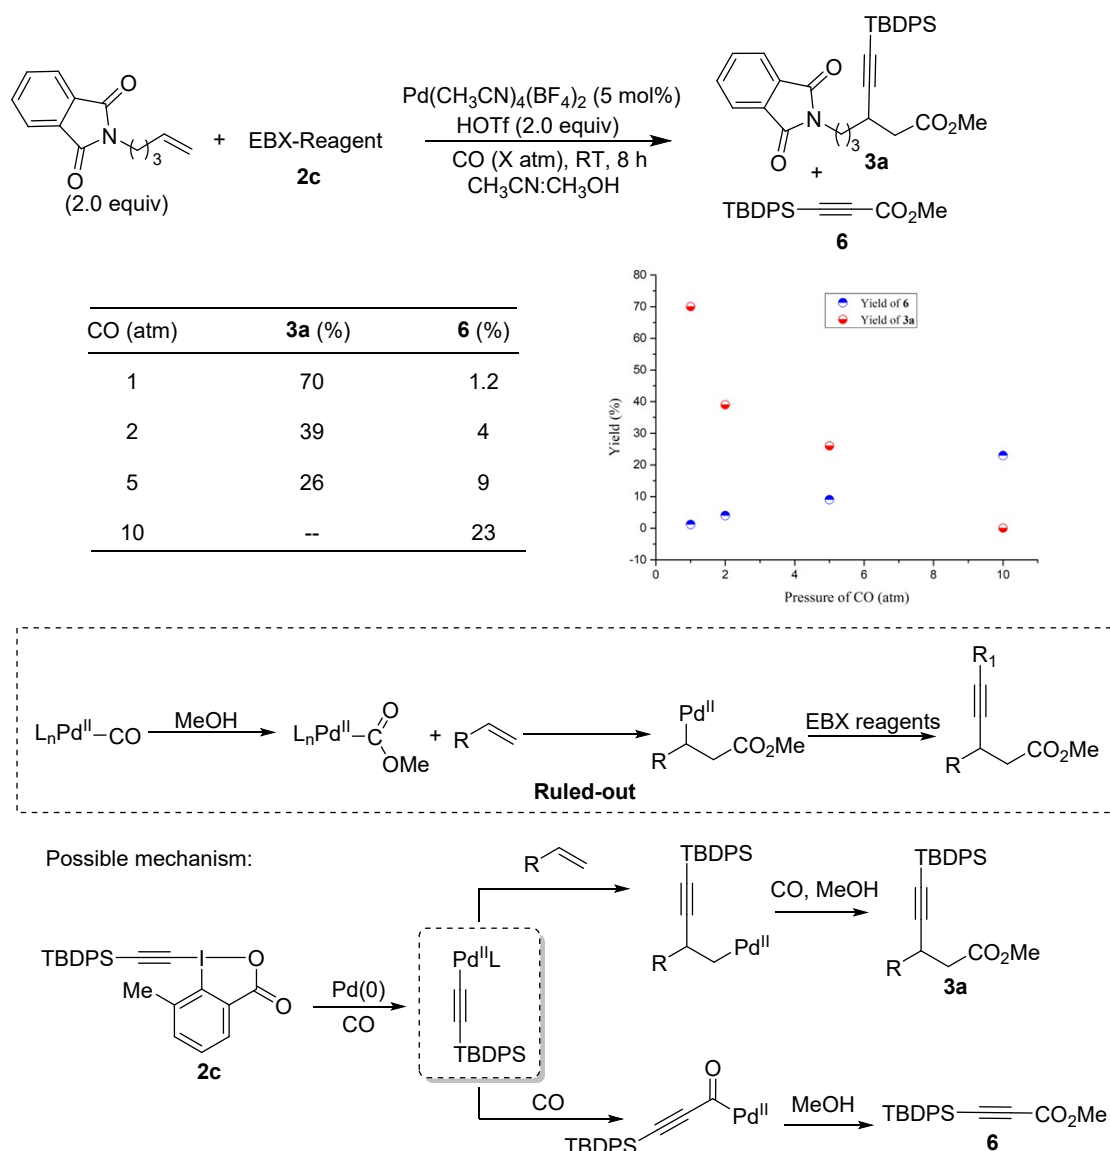

**Scheme S1** Influence of CO pressure

The yields of target product **3a** were decreased when increasing CO pressure. Those results ruled out the possibility that  $\text{CO}_2\text{Me}-\text{Pd}(\text{II})$  acted as a key intermediate for the target reaction, in which a high CO pressure could be benefited for alkynylcarbonylation products formation. On the other hand, an alkynyl- $\text{Pd}^{\text{II}}$  species might be involved in the reaction. Alkene insertion by alkynyl- $\text{Pd}^{\text{II}}$  occurred exclusively at 1 atm CO pressure, whereas the direct carbonylation of alkynyl- $\text{Pd}^{\text{II}}$  was promoted to a remarkable extent by increasing the CO pressure.

### 2.6.3 Stereochemistry of alkynylcarbonylation process.

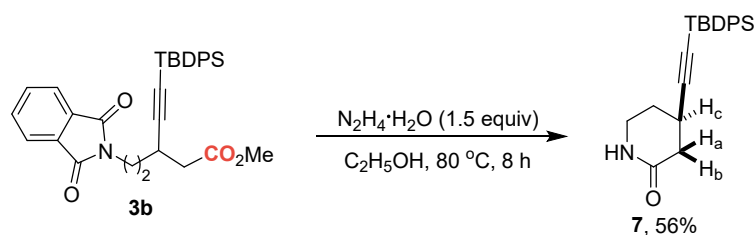

**7** was prepared via literature process.<sup>1</sup>  $^1\text{H}$  NMR (400 MHz,  $\text{CDCl}_3$ )  $\delta$  7.77 – 8.75 (m, 4H), 7.42 – 7.34 (m, 6H), 6.01 (br, 1H), 3.63 – 3.57 (m, 1H), 3.40 – 3.33 (m, 1H), 3.13 – 3.07 (m, 1H), 2.73 (dd,  $J = 17.6, 6.0$  Hz, 1H), 2.61 (dd,  $J = 17.6, 7.2$  Hz, 1H), 2.17 – 1.97 (m, 2H), 1.06 (s, 9H).  $^{13}\text{C}$  NMR (100 MHz,  $\text{CDCl}_3$ )  $\delta$  170.0, 135.5, 133.2, 129.5, 127.7, 111.0, 82.2, 40.2, 37.4, 27.9, 27.0, 25.8, 18.4. HRMS:  $m/z$  (ESI) calculated  $[\text{M}+\text{Na}]^+$ : 384.1754 measured: 384.1755. Then we turned our attention to confirm the relative configuration of **7**. The NOESY spectroscopy shows that there are stronger NOE between  $\text{H}_b$  and  $\text{H}_c$ , and weak NOE with  $\text{H}_c$  and  $\text{H}_a$ , which means  $\text{H}_c$  and  $\text{H}_b$  in one side of ring, and  $\text{H}_c$  and  $\text{H}_a$  in cross sides of ring.

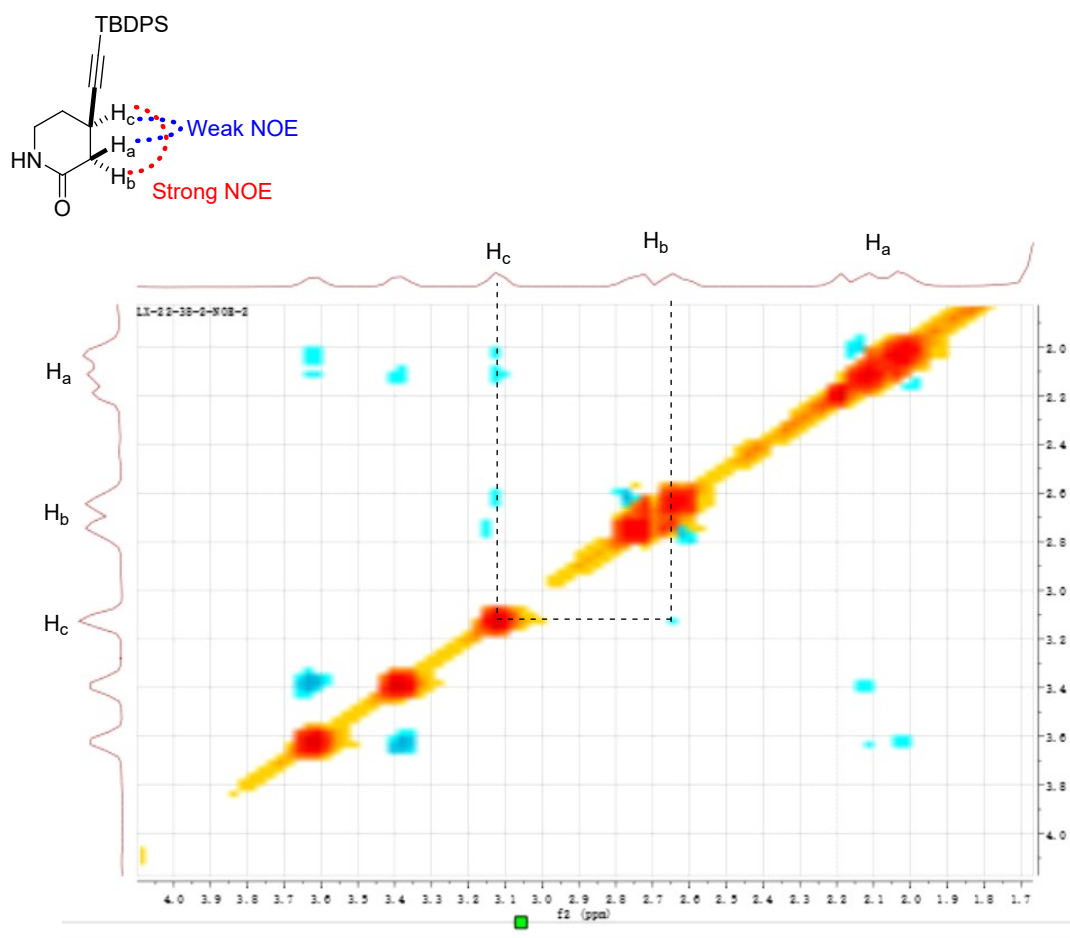

The deuterium-labelled substrate *trans*-**1b**-*d*<sub>1</sub> (90% D containing) was synthesized according to the literature<sup>3</sup> and then subjected to the reaction conditions. The configuration of the corresponding product *d*<sub>1</sub>-**3b** was determined by the further transformation to give six membered-lactam *d*<sub>1</sub>-**7** as a single isomer. This result indicated that the reaction could involve a *cis*-alkynylpalladation followed by CO insertion and nucleophilic attack of acyl Pd(II) intermediate by methanol in sequence to afford the arylcarbonylation products.

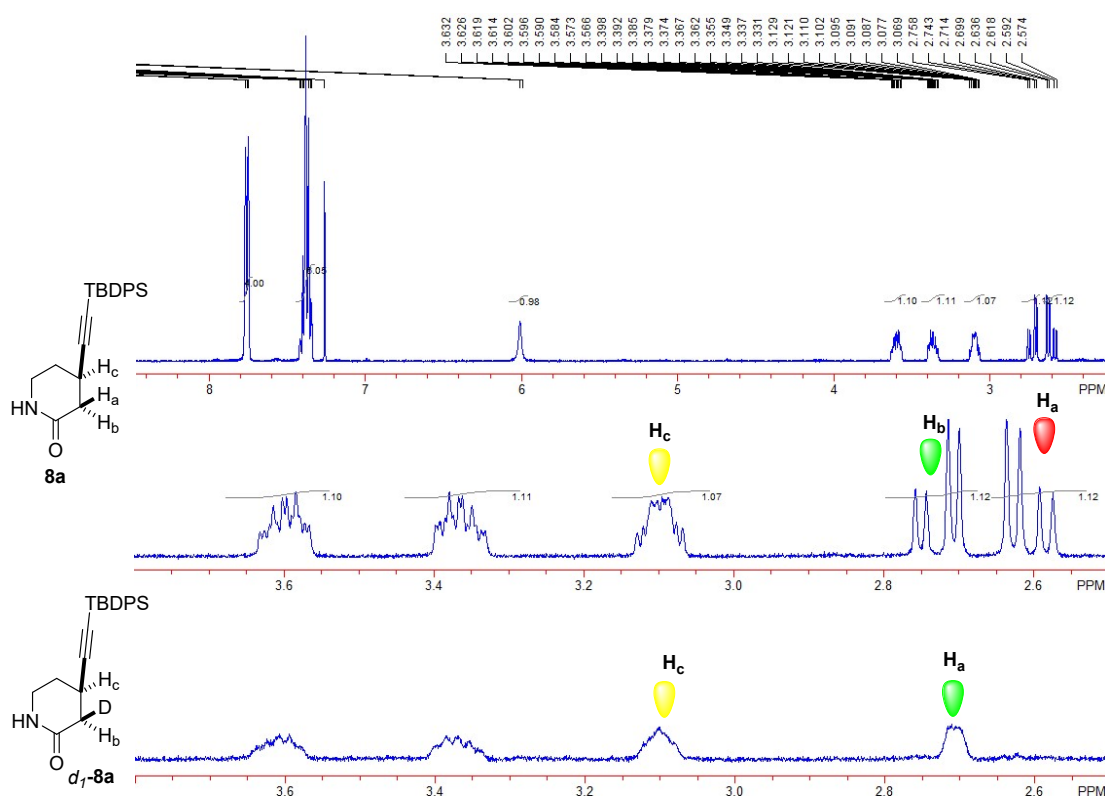

Figure S3 <sup>1</sup>H NMR of **8a** and *d*<sub>1</sub>-**8a**

### 3. X-Ray structure of target product.

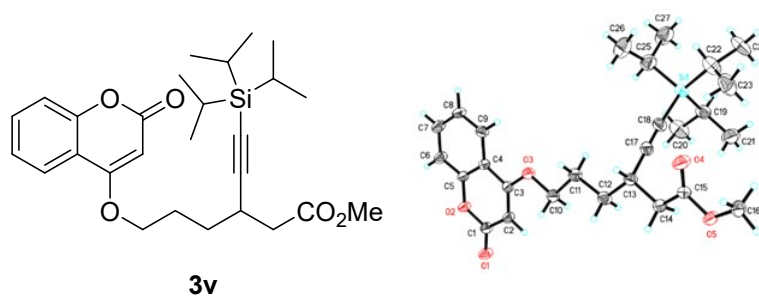

CCDC Number: 2129108

Figure S4 X-Ray structure of **3v**

|                                   |                                                   |                  |
|-----------------------------------|---------------------------------------------------|------------------|
| Identification code               | mo_d8v19162_0m                                    |                  |
| Empirical formula                 | C <sub>27</sub> H <sub>38</sub> O <sub>5</sub> Si |                  |
| Formula weight                    | 470.66                                            |                  |
| Temperature                       | 193(2) K                                          |                  |
| Wavelength                        | 0.71073 Å                                         |                  |
| Crystal system                    | Triclinic                                         |                  |
| Space group                       | P -1                                              |                  |
| Unit cell dimensions              | a = 13.9071(10) Å                                 | α = 109.976(2)°. |
|                                   | b = 14.9140(12) Å                                 | β = 113.932(2)°. |
|                                   | c = 16.1401(13) Å                                 | γ = 98.587(2)°.  |
| Volume                            | 2709.4(4) Å <sup>3</sup>                          |                  |
| Z                                 | 4                                                 |                  |
| Density (calculated)              | 1.154 Mg/m <sup>3</sup>                           |                  |
| Absorption coefficient            | 0.119 mm <sup>-1</sup>                            |                  |
| F(000)                            | 1016                                              |                  |
| Crystal size                      | 0.200 x 0.170 x 0.100 mm <sup>3</sup>             |                  |
| Theta range for data collection   | 1.700 to 25.500°.                                 |                  |
| Index ranges                      | -16 ≤ h ≤ 16, -18 ≤ k ≤ 18, -19 ≤ l ≤ 19          |                  |
| Reflections collected             | 37764                                             |                  |
| Independent reflections           | 10067 [R(int) = 0.0562]                           |                  |
| Completeness to theta = 25.242°   | 99.8 %                                            |                  |
| Absorption correction             | Semi-empirical from equivalents                   |                  |
| Max. and min. transmission        | 0.7456 and 0.6424                                 |                  |
| Refinement method                 | Full-matrix least-squares on F <sup>2</sup>       |                  |
| Data / restraints / parameters    | 10067 / 132 / 666                                 |                  |
| Goodness-of-fit on F <sup>2</sup> | 1.046                                             |                  |
| Final R indices [I > 2σ(I)]       | R1 = 0.0727, wR2 = 0.1705                         |                  |
| R indices (all data)              | R1 = 0.1098, wR2 = 0.1962                         |                  |
| Extinction coefficient            | 0.0076(11)                                        |                  |
| Largest diff. peak and hole       | 0.592 and -0.274 e.Å <sup>-3</sup>                |                  |

#### 4. New compounds characterization

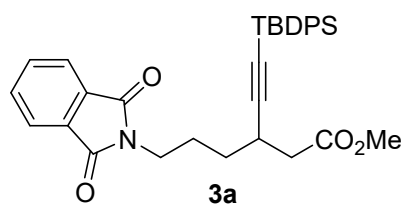

The crude material was purified by column chromatography on silica gel with a gradient eluent of petroleum ether and ethyl acetate (10:1 to 1:1) to get **3a** ( $R_f = 0.40$ , PE:EA = 3:1) (Pale yellow oil, 85.9 mg of 6:1 mixture, 69%, 6:1).  $^1\text{H}$  NMR (400 MHz,  $\text{CDCl}_3$ )  $\delta$  7.86 – 7.83 (m, 2H), 7.78 – 7.76 (m, 4H), 7.72 – 7.67 (m, 2H), 7.40 – 7.34 (m, 6H), 3.77 (t,  $J = 7.2$  Hz, 2H), 3.67 (s, 3H), 3.15 – 3.10 (m, 1H), 2.66 (dd,  $J = 15.2, 8.0$  Hz, 1H), 2.55 (dd,  $J = 15.2, 6.8$  Hz, 1H), 2.10 – 2.04 (m, 1H), 1.95 – 1.89 (m, 1H), 1.78 – 1.62 (m, 2H), 1.03 (s, 9H).  $^{13}\text{C}$  NMR (100 MHz,  $\text{CDCl}_3$ )  $\delta$  171.6, 168.3, 135.5, 133.8, 133.4, 132.0, 129.3, 127.6, 123.2, 111.8, 81.8, 51.7, 39.9, 37.5, 31.7, 29.2, 26.9, 26.6, 18.4. HRMS:  $m/z$  (ESI) calculated  $[\text{M}+\text{NH}_4]^+$ : 555.2674, measured: 555.2674. IR (neat): 2930, 2855, 2324, 2171, 1772, 1736, 1430, 1394, 1107, 699  $\text{cm}^{-1}$ .

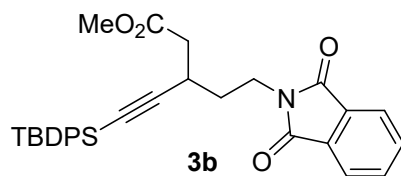

The crude material was purified by column chromatography on silica gel with a gradient eluent of petroleum ether and ethyl acetate (10:1 to 1:1) to get **3b** ( $R_f = 0.34$ , PE:EA = 3:1) (Pale yellow oil, 86.8 mg of 3:1 mixture, 62%, 3:1).  $^1\text{H}$  NMR (400 MHz,  $\text{CDCl}_3$ )  $\delta$  7.85 – 7.62 (m, 8H), 7.61 – 7.35 (m, 6H), 4.02 – 3.81 (m, 2H), 3.66 (s, 3H), 3.17 – 3.13 (m, 1H), 2.77 – 2.63 (m, 2H), 2.04 – 1.99 (m, 2H), 1.04 (s, 9H).  $^{13}\text{C}$  NMR (100 MHz,  $\text{CDCl}_3$ )  $\delta$  171.4, 168.2, 135.6, 133.8, 133.3, 132.0, 129.4, 127.6, 123.2, 111.0, 82.3, 51.9, 39.7, 36.1, 33.0, 27.6, 26.9, 18.4. HRMS:  $m/z$  (ESI) calculated  $[\text{M}+\text{Na}]^+$ : 546.2071, measured: 546.2067. IR (neat): 2933, 2934, 2174, 1767, 1743, 1430, 1267, 1107, 699  $\text{cm}^{-1}$ .

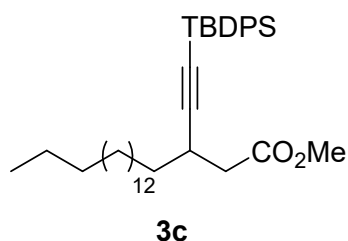

The crude material was purified by column chromatography on silica gel with a gradient eluent of petroleum ether and ethyl acetate (1:0 to 10:1) to get **3c** ( $R_f = 0.78$ , PE:EA = 10:1) (Yellow oil, 81.5 mg, 71%,

10:1).  $^1\text{H}$  NMR (400 MHz,  $\text{CDCl}_3$ )  $\delta$  7.81 – 7.78 (m, 4H), 7.41 – 7.34 (m, 6H), 3.70 (s, 3H), 3.08 – 3.04 (m, 1H), 2.66 (dd,  $J$  = 15.2, 7.6 Hz, 1H), 2.57 (dd,  $J$  = 15.2, 6.8 Hz, 1H), 1.60 – 1.52 (m, 4H), 1.37 – 1.26 (m, 26H), 1.06 (s, 9H), 0.88 (t,  $J$  = 6.8 Hz, 3H).  $^{13}\text{C}$  NMR (100 MHz,  $\text{CDCl}_3$ )  $\delta$  172.0, 135.5, 133.7, 129.3, 127.6, 112.8, 81.1, 51.7, 40.1, 34.5, 31.9, 29.68, 29.66, 29.62, 29.55, 29.35, 29.26, 27.2, 27.0, 22.7, 18.5, 14.1. HRMS:  $m/z$  (ESI) calculated  $[\text{M}+\text{Na}]^+$ : 597.4098, measured: 597.4090. IR (neat): 2922, 2853, 2324, 2169, 1744, 1463, 1227, 1163, 1107, 919, 720, 660  $\text{cm}^{-1}$

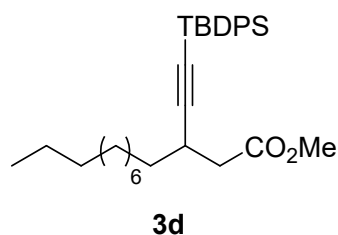

The crude material was purified by column chromatography on silica gel with a gradient eluent of petroleum ether and ethyl acetate (1:0 to 10:1) to get **3d** ( $R_f$  = 0.75, PE:EA = 10:1) (Yellow oil, 78.4 mg, 80%,

10:1).  $^1\text{H}$  NMR (400 MHz,  $\text{CDCl}_3$ )  $\delta$  7.80 – 7.78 (m, 4H), 7.41 – 7.34 (m, 6H), 3.69 (s, 3H), 3.08 – 3.04 (m, 1H), 2.65 (dd,  $J$  = 15.2, 7.6 Hz, 1H), 2.56 (dd,  $J$  = 15.2, 6.8 Hz, 1H), 1.60 – 1.52 (m, 4H), 1.37 – 1.26 (m, 14H), 1.06 (s, 9H), 0.88 (t,  $J$  = 6.8 Hz, 3H).  $^{13}\text{C}$  NMR (100 MHz,  $\text{CDCl}_3$ )  $\delta$  172.0, 135.5, 133.7, 129.3, 127.6, 112.8, 81.1, 51.7, 40.1, 34.5, 31.9, 29.62, 29.55, 29.31, 29.26, 27.2, 27.0, 26.9, 22.7, 28.5, 14.1. HRMS:  $m/z$  (ESI) calculated  $[\text{M}+\text{Na}]^+$ : 513.3159, measured: 513.3168. IR (neat): 2924, 2860, 2324, 2169, 1743, 1462, 1229, 1164, 1107, 918, 674, 660  $\text{cm}^{-1}$ .

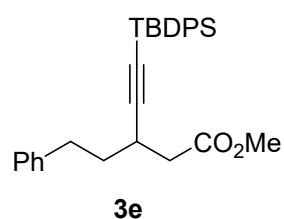

The crude material was purified by column chromatography on silica gel with a gradient eluent of petroleum ether and ethyl acetate (20:1 to 5:1) to get **3e** ( $R_f$  = 0.53, PE:EA = 10:1) (Yellow oil, 67.2 mg, 74%, 9:1).  $^1\text{H}$  NMR (400 MHz,  $\text{CDCl}_3$ )

$\delta$  7.85 – 7.83 (m, 4H), 7.44 – 7.37 (m, 6H), 7.33 – 7.29 (m, 2H), 7.26 – 7.20 (m, 3H), 3.70 (s, 3H), 3.11 – 2.99 (m, 2H), 2.89 – 2.84 (m, 1H), 2.71 (dd,  $J$  = 15.6, 8.0 Hz, 1H), 2.57 (dd,  $J$  = 15.6, 7.2 Hz, 1H), 1.96 – 1.88 (m, 2H), 1.06 (s, 9H).  $^{13}\text{C}$  NMR (100 MHz,  $\text{CDCl}_3$ )  $\delta$  171.7, 141.4, 135.5, 133.5, 129.4, 128.5, 127.6, 127.62, 126.0, 112.2, 81.9, 51.6, 39.9, 36.4, 33.6, 29.3, 27.0, 18.5. HRMS:  $m/z$  (ESI) calculated  $[\text{M}+\text{NH}_4]^+$ : 472.2666, measured: 472.2668. IR (neat): 2930, 2856, 2170, 1738, 1428, 1165, 1107,

819, 741, 698  $\text{cm}^{-1}$ . **3e'**  $^1\text{H}$  NMR (400 MHz,  $\text{CDCl}_3$ )  $\delta$  7.80 – 7.82 (m, 4H), 3.72 (s, 3H).

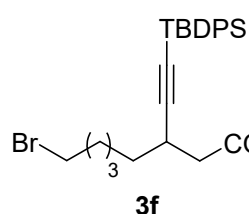

The crude material was purified by column chromatography on silica gel with a gradient eluent of petroleum ether and ethyl acetate (30:1 to 10:1) to get **3f** ( $R_f$  = 0.66, PE:EA = 10:1), (Yellow oil, 69.4 mg, 70%).  $^1\text{H}$  NMR (400 MHz,  $\text{CDCl}_3$ )  $\delta$  7.80 – 7.77 (m, 4H), 7.42 – 7.34 (m, 6H), 3.70 (s, 3H), 3.42 (t,  $J$  = 6.8 Hz, 2H), 3.09 – 3.06 (m, 1H), 2.67 (dd,  $J$  = 15.2, 8.0 Hz, 1H), 2.56 (dd,  $J$  = 15.2, 6.8 Hz, 1H), 1.92 – 1.85 (m, 2H), 1.67 – 1.48 (m, 6H), 1.06 (s, 9H).  $^{13}\text{C}$  NMR (100 MHz,  $\text{CDCl}_3$ )  $\delta$  171.8, 135.5, 133.5, 129.4, 127.6, 112.4, 81.4, 51.8, 40.0, 34.2, 33.7, 32.6, 29.5, 27.7, 27.0, 26.4, 18.4. HRMS:  $m/z$  (ESI) calculated  $[\text{M}+\text{NH}_4]^+$ : 516.1928, measured: 515.1930. IR (neat): 2930, 2856, 2170, 1738, 1428, 1165, 1107, 819, 741, 698  $\text{cm}^{-1}$

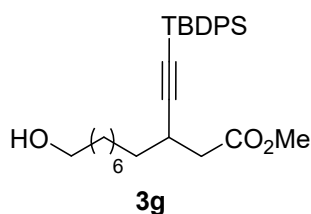

The crude material was purified by column chromatography on silica gel with a gradient eluent of petroleum ether and ethyl acetate (10:1 to 1:1) to get **3g** ( $R_f$  = 0.46, PE:EA = 3:1) (Pale yellow oil, 78.5 mg, 82%).  $^1\text{H}$  NMR (400 MHz,  $\text{CDCl}_3$ )  $\delta$  7.81 – 7.79 (m, 4H), 7.42 – 7.26 (m, 6H), 3.70 (s, 3H), 3.62 (t,  $J$  = 6.4 Hz, 2H), 3.09 – 3.06 (m, 1H), 2.66 (dd,  $J$  = 15.6, 8.4 Hz, 1H), 2.56 (dd,  $J$  = 14.8, 6.8 Hz, 1H), 1.76 (br, 1H), 1.64 – 1.51 (m, 6H), 1.41 – 1.27 (m, 9H), 1.07 (s, 9H).  $^{13}\text{C}$  NMR (100 MHz,  $\text{CDCl}_3$ )  $\delta$  172.0, 135.5, 133.6, 129.3, 127.6, 112.7, 81.1, 62.9, 51.7, 40.0, 34.4, 32.7, 29.5, 29.4, 29.2, 29.1, 27.1, 26.9, 25.6, 18.4. HRMS:  $m/z$  (ESI) calculated  $[\text{M}+\text{NH}_4]^+$ : 496.3241, measured: 496.3245. IR (neat): 2928, 2855, 2170, 1738, 1429, 1359, 1107, 741, 698, 630  $\text{cm}^{-1}$

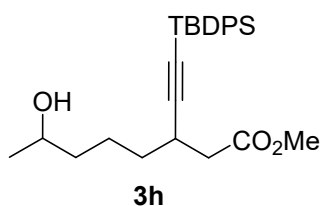

The crude material was purified by column chromatography on silica gel with a gradient eluent of petroleum ether and ethyl acetate (10:1 to 1:1) to get **3h** ( $R_f$  = 0.50, PE:EA = 3:1),

(Yellow oil, 65.4 mg, 75%, 7:1, dr 1:1).  $^1\text{H}$  NMR (400 MHz,  $\text{CDCl}_3$ )  $\delta$  7.79 – 7.77 (m, 4H), 7.41 – 7.34 (m, 6H), 3.84 – 3.79 (m, 1H), 3.69 (s, 3H), 3.09 – 3.06 (m, 1H), 2.67 (dd,  $J$  = 15.2, 7.6 Hz, 1H), 2.57 (dd,  $J$  = 15.2, 8.0 Hz, 1H), 1.75 – 1.45 (m, 7H), 1.19 (d,  $J$  = 6.4 Hz, 3H), 1.06 (s, 9H).  $^{13}\text{C}$  NMR (100 MHz,  $\text{CDCl}_3$ )  $\delta$  171.9, 135.5, 133.5, 129.4, 127.6, 112.4, 81.4, 67.9, 51.7, 40.0, 38.8, 34.4, 29.6, 26.9, 23.45, 23.40, 18.4. HRMS:  $m/z$  (ESI) calculated  $[\text{M}+\text{NH}_4]^+$ : 454.2722, measured: 454.2725. IR (neat): 2930, 2857, 2170, 1737, 1429, 1158, 1107, 819, 714, 699  $\text{cm}^{-1}$

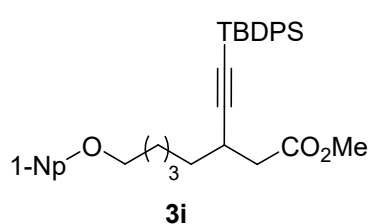

The crude material was purified by column chromatography on silica gel with a gradient eluent of petroleum ether and ethyl acetate (10:1 to 3:1) to afford **3i** ( $R_f$  = 0.61, PE:EA = 3:1), (Yellow oil, 75.3 mg, 67%, 12:1).  $^1\text{H}$  NMR (400 MHz,  $\text{CDCl}_3$ )  $\delta$  8.36 – 8.34 (m, 1H), 7.88 – 7.82 (m, 5H), 7.54 – 7.37 (m, 10H), 6.80 (d,  $J$  = 6.8 Hz, 1H), 4.17 (t,  $J$  = 6.4 Hz, 2H), 3.74 (s, 3H), 3.18 – 3.14 (m, 1H), 2.73 (dd,  $J$  = 15.2, 7.6 Hz, 1H), 2.62 (dd,  $J$  = 15.2, 6.8 Hz, 1H), 2.02 – 1.97 (m, 2H), 1.83 – 1.62 (m, 6H), 1.12 (s, 9H).  $^{13}\text{C}$  NMR (100 MHz,  $\text{CDCl}_3$ )  $\delta$  171.2, 154.7, 135.5, 134.4, 133.5, 129.4, 127.6, 127.4, 126.3, 125.9, 125.7, 125.0, 122.0, 119.9, 112.6, 104.5, 81.3, 67.8, 51.7, 40.0, 34.4, 29.6, 29.2, 27.1, 27.0, 25.9, 18.4. HRMS:  $m/z$  (ESI) calculated  $[\text{M}+\text{NH}_4]^+$ : 580.3241, measured: 580.3249. IR (neat): 2930, 2856, 2324, 2170, 1737, 1579, 1268, 1238, 1107, 819, 790, 740  $\text{cm}^{-1}$ .

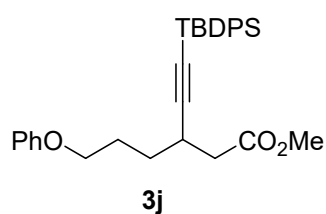

The crude material was purified by column chromatography on silica gel with a gradient eluent of petroleum ether and ethyl acetate (10:1 to 3:1) to get **3j** ( $R_f$  = 0.58, PE:EA = 3:1), (Pale yellow oil, 71.6 mg, 74%, 15:1).  $^1\text{H}$  NMR (400 MHz,  $\text{CDCl}_3$ )  $\delta$  7.80 – 7.77 (m, 4H), 7.40 – 7.24 (m, 6H), 7.26 (t,  $J$  = 8.0 Hz, 2H), 6.95 – 6.88 (m, 3H), 4.02 (t,  $J$  = 6.4 Hz, 2H), 3.68 (s, 3H), 3.16 – 3.12 (m, 1H), 2.69 (dd,  $J$  = 15.6, 8.4 Hz, 1H), 2.56 (dd,  $J$  = 15.2, 6.8 Hz, 1H), 2.14 – 2.10 (m, 1H), 2.04 – 1.98 (m, 1H), 1.87 – 1.61 (m, 2H), 1.06 (s, 9H).  $^{13}\text{C}$  NMR (100 MHz,  $\text{CDCl}_3$ )  $\delta$  171.8, 158.9, 135.5, 133.5, 129.4, 129.38, 127.6, 120.6, 114.4, 112.1, 81.7, 67.2, 51.8, 40.0, 31.2, 29.4, 27.1,

27.0, 18.4. HRMS:  $m/z$  (ESI) calculated  $[M+NH_4]^+$ : 502.2722, measured: 502.2779. IR (neat): 2929, 2856, 2338, 2169, 1738, 1428, 1242, 1079, 752, 693  $cm^{-1}$

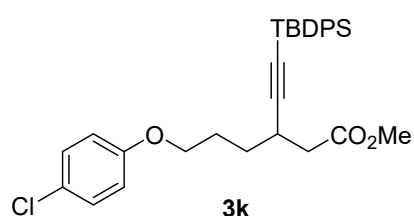

The crude material was purified by column chromatography on silica gel with a gradient eluent of petroleum ether and ethyl acetate (10:1 to 3:1) to get **3k** ( $R_f$  = 0.57, PE:EA = 3:1), (Pale yellow oil, 70.5 mg, 68%, 8:1).  $^1H$  NMR (400 MHz,  $CDCl_3$ )  $\delta$  7.82 – 7.78 (m, 4H), 7.43 – 7.36 (m, 6H), 7.21 (d,  $J$  = 8.8 Hz, 2H), 6.82 (d,  $J$  = 8.8 Hz, 2H), 4.00 (t,  $J$  = 6.0 Hz, 2H), 3.71 (s, 3H), 3.18 – 3.14 (m, 1H), 2.72 (dd,  $J$  = 15.2, 7.6 Hz, 1H), 2.61 (dd,  $J$  = 15.6, 6.8 Hz, 1H), 2.16 – 2.10 (m, 1H), 2.05 – 1.97 (m, 1H), 1.87 – 1.73 (m, 2H), 1.08 (s, 9H).  $^{13}C$  NMR (100 MHz,  $CDCl_3$ )  $\delta$  171.7, 157.5, 135.5, 133.4, 129.4, 129.2, 127.6, 125.4, 115.7, 112.0, 81.9, 67.6, 57.7, 51.2, 40.0, 31.1, 29.4, 27.0, 18.4. HRMS:  $m/z$  (ESI) calculated  $[M+NH_4]^+$ : 536.2382, measured: 536.2379. IR (neat): 2973, 2902, 2348, 1741, 1394, 1252, 1054, 892, 643  $cm^{-1}$

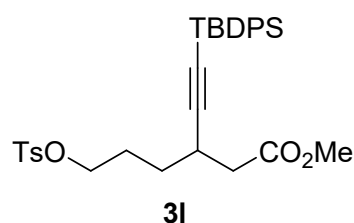

The crude material was purified by column chromatography on silica gel with a gradient eluent of petroleum ether and ethyl acetate (10:1 to 1:1) to **3l** ( $R_f$  = 0.42, PE:EA = 3:1), (Yellow oil, 67.4 mg of 7:1 mixture, 53%, 7:1).  $^1H$  NMR (400 MHz,  $CDCl_3$ )  $\delta$  7.80 – 7.75 (m, 6H), 7.42 – 7.34 (m, 6H), 7.30 (d,  $J$  = 8.4 Hz, 2H), 4.10 (t,  $J$  = 6.0 Hz, 2H), 3.69 (s, 3H), 3.05 – 2.99 (m, 1H), 2.65 (dd,  $J$  = 15.6, 7.6 Hz, 1H), 2.52 (dd,  $J$  = 15.2, 6.8 Hz, 1H), 2.42 (s, 3H), 2.05 – 1.98 (m, 1H), 1.89 – 1.83 (m, 1H), 1.75 – 1.56 (m, 2H), 1.06 (s, 9H).  $^{13}C$  NMR (100 MHz,  $CDCl_3$ )  $\delta$  171.4, 144.7, 135.4, 133.2, 132.9, 129.8, 129.4, 128.0, 127.6, 111.4, 82.1, 60.9, 51.8, 39.8, 30.3, 29.0, 26.9, 26.7, 21.5, 18.4. HRMS:  $m/z$  (ESI) calculated  $[M+NH_4]^+$ : 580.2547, measured: 580.2549. IR (neat): 2929, 2856, 2171, 1737, 1597, 1429, 1173, 1107, 919, 741  $cm^{-1}$ . **3l'**  $^1H$  NMR (400 MHz,  $CDCl_3$ )  $\delta$  7.80 – 7.75 (m, 6H), 7.42 – 7.34 (m, 6H), 7.30 (d,  $J$  = 8.4 Hz, 2H), 4.07 (t,  $J$  = 6.0 Hz, 2H), 3.71 (s, 3H).

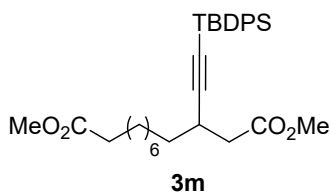

The crude material was purified by column chromatography on silica gel with a gradient eluent of petroleum ether and ethyl acetate (20:1 to 10:1) to get **3m** ( $R_f$  = 0.63, PE:EA = 10:1), (Yellow oil, 65.5 mg, 63%, 14:1).  $^1\text{H}$  NMR (400 MHz,  $\text{CDCl}_3$ )  $\delta$  7.81 – 7.78 (m, 4H), 7.42 – 7.34 (m, 6H), 3.69 (s, 3H), 3.67 (s, 3H), 3.08 – 3.06 (m, 1H), 2.66 (dd,  $J$  = 15.2, 7.2 Hz, 1H), 2.55 (dd,  $J$  = 15.2, 8.4 Hz, 1H), 2.30 (t,  $J$  = 7.6 Hz, 2H), 1.66 – 1.56 (m, 6H), 1.33 – 1.30 (m, 8H), 1.06 (s, 9H).  $^{13}\text{C}$  NMR (100 MHz,  $\text{CDCl}_3$ )  $\delta$  174.3, 171.9, 135.5, 133.6, 129.3, 127.6, 112.8, 81.1, 51.7, 51.4, 40.0, 34.5, 34.0, 29.6, 29.3, 29.1, 29.08, 27.2, 26.9, 24.9, 18.4. HRMS:  $m/z$  (ESI) calculated  $[\text{M}+\text{NH}_4]^+$ : 538.3347, measured: 538.3342. IR (neat): 2930, 2856, 2170, 1738, 1428, 1165, 1107, 819, 741, 698  $\text{cm}^{-1}$

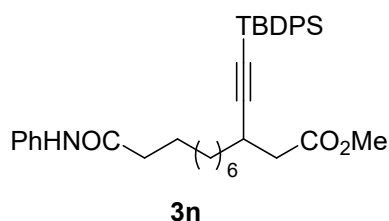

The crude material was purified by column chromatography on silica gel with a gradient eluent of petroleum ether and ethyl acetate (10:1 to 1:1) to get **3n** ( $R_f$  = 0.35, PE:EA = 2:1), (Yellow solid, 79.1 mg, 68%, 12:1).  $^1\text{H}$  NMR (400 MHz,  $\text{CDCl}_3$ )  $\delta$  7.81 – 7.78 (m, 4H), 7.51 (d,  $J$  = 8.0 Hz, 2H), 7.41 – 7.26 (m, 9H), 7.09 (t,  $J$  = 7.2 Hz, 1H), 3.69 (s, 3H), 3.07 – 3.04 (m, 1H), 2.65 (dd,  $J$  = 15.2, 8.0 Hz, 1H), 2.55 (dd,  $J$  = 15.2, 6.8 Hz, 1H), 2.31 (t,  $J$  = 7.2 Hz, 2H), 1.72 – 1.66 (m, 3H), 1.62 – 1.53 (m, 4H), 1.33 – 1.26 (m, 7H), 1.06 (s, 9H).  $^{13}\text{C}$  NMR (100 MHz,  $\text{CDCl}_3$ )  $\delta$  172.0, 171.4, 135.5, 133.6, 129.3, 128.9, 127.6, 127.5, 124.1, 119.7, 112.8, 81.1, 51.7, 40.1, 37.7, 34.4, 29.5, 29.2, 29.1, 29.0, 27.1, 26.9, 25.5, 18.4. HRMS:  $m/z$  (ESI) calculated  $[\text{M}+\text{NH}_4]^+$ : 599.3663, measured: 599.3670. IR (neat): 3373, 2927, 2853, 2338, 2172, 1720.3, 1682, 1598, 1534, 1077, 740  $\text{cm}^{-1}$ .

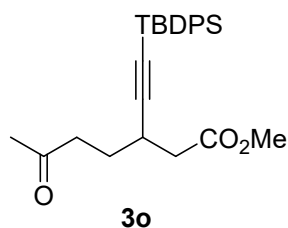

The crude material was purified by column chromatography on silica gel with a gradient eluent of petroleum ether and ethyl acetate (10:1 to 3:1) to get **3o** ( $R_f$  = 0.54, PE:EA = 3:1), (Yellow oil, 56.3 mg, 67%, 10:1).  $^1\text{H}$  NMR (400 MHz,

CDCl<sub>3</sub>)  $\delta$  7.78 – 7.76 (m, 4H), 7.43 – 7.35 (m, 6H), 3.70 (s, 3H), 3.14 – 3.07 (m, 1H), 2.80 – 2.67 (m, 3H), 2.58 (dd,  $J$  = 15.2, 6.8 Hz, 1H), 2.14 (s, 3H), 2.04 – 1.91 (m, 1H), 1.82 – 1.71 (m, 1H), 1.06 (s, 9H). <sup>13</sup>C NMR (100 MHz, CDCl<sub>3</sub>)  $\delta$  207.8, 171.5, 135.4, 133.3, 129.4, 127.6, 111.6, 82.3, 51.8, 41.1, 39.9, 30.0, 28.9, 28.1, 26.9, 18.4. HRMS:  $m/z$  (ESI) calculated [M+NH<sub>4</sub>]<sup>+</sup>: 438.2459, measured: 438.2466. IR (neat): 2930, 2856, 2323, 2170, 1737, 1715, 1428, 1166, 1107, 819, 714, 699 cm<sup>-1</sup>

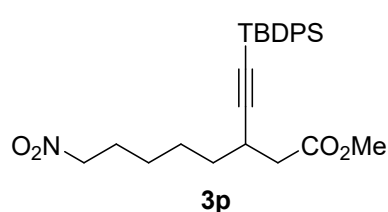

The crude material was purified by column chromatography on silica gel with a gradient eluent of petroleum ether and ethyl acetate (10:1 to 3:1) to get **3p** ( $R_f$  = 0.43, PE:EA = 5:1), (Yellow oil, 67.1 mg, 72%). <sup>1</sup>H NMR (400 MHz, CDCl<sub>3</sub>)  $\delta$  7.79 – 7.77 (m, 4H), 7.43 – 7.35 (m, 6H), 4.35 (t,  $J$  = 7.2 Hz, 2H), 3.70 (s, 3H), 3.08 – 3.06 (m, 1H), 2.68 (dd,  $J$  = 15.2, 7.6 Hz, 1H), 2.56 (dd,  $J$  = 15.6, 7.2 Hz, 1H), 2.06 – 1.98 (m, 2H), 1.71 – 1.57 (m, 4H), 1.51 – 1.40 (m, 2H), 1.07 (s, 9H). <sup>13</sup>C NMR (100 MHz, CDCl<sub>3</sub>)  $\delta$  171.7, 135.5, 133.4, 129.4, 127.6, 112.1, 81.6, 75.4, 51.8, 39.9, 34.0, 29.4, 27.2, 26.9, 26.5, 25.8, 18.4. HRMS:  $m/z$  (ESI) calculated [M+NH<sub>4</sub>]<sup>+</sup>: 483.2674, measured: 483.2670. IR (neat): 2930, 2857, 2338, 2172, 1739, 1374, 1234, 1143, 1107, 699 cm<sup>-1</sup>.

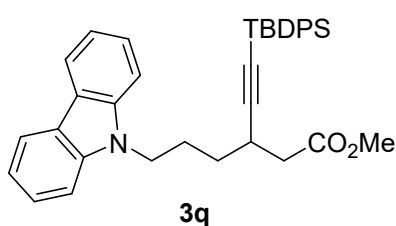

The crude material was purified by column chromatography on silica gel with a gradient eluent of petroleum ether and ethyl acetate (10:1 to 1:1) to get **3q** ( $R_f$  = 0.52, PE:EA = 2:1), (Yellow oil, 63.5 mg, 57%, 9:1). <sup>1</sup>H NMR (400 MHz, CDCl<sub>3</sub>)  $\delta$  8.08 (d,  $J$  = 8.0 Hz, 2H), 7.73 (d,  $J$  = 6.8 Hz, 4H), 7.40 – 7.28 (m, 10H), 7.22 – 7.18 (m, 2H), 4.36 – 4.32 (m, 2H), 3.62 (s, 3H), 3.10 – 3.07 (m, 1H), 2.61 (dd,  $J$  = 15.2, 8.0 Hz, 1H), 2.47 (dd,  $J$  = 15.2, 6.4 Hz, 1H), 2.26 – 2.21 (m, 1H), 2.13 – 2.06 (m, 1H), 1.69 – 1.63 (m, 2H), 1.02 (s, 9H). <sup>13</sup>C NMR (100 MHz, CDCl<sub>3</sub>)  $\delta$  171.6, 140.3, 135.4, 133.3, 129.4, 127.6, 125.7, 122.8, 120.3, 118.8, 111.7, 108.5, 82.1, 51.7, 42.6, 39.9, 32.0, 29.4, 26.9, 26.8, 18.4. HRMS:  $m/z$

(ESI) calculated  $[M+H]^+$ : 558.2823, measured: 558.2832. IR (neat): 2928, 2855, 2169, 1735, 1484, 1452, 1326, 1152, 1107, 819, 747, 740  $\text{cm}^{-1}$ .

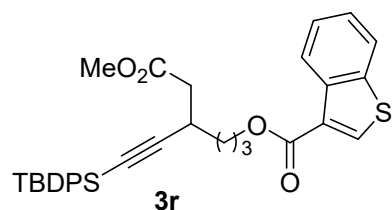

The crude material was purified by column chromatography on silica gel with a gradient eluent of petroleum ether and ethyl acetate (10:1 to 1:1) to get **3r** ( $R_f$  = 0.51, PE:EA = 2:1), (Yellow oil, 85.2 mg, 75%, 7:1).

$^1\text{H}$  NMR (400 MHz,  $\text{CDCl}_3$ )  $\delta$  8.50 (d,  $J$  = 8.0 Hz, 1H), 8.38 (s, 1H), 7.87 (d,  $J$  = 8.0 Hz, 1H), 7.81 – 7.79 (m, 4H), 7.48 (t,  $J$  = 6.8 Hz, 1H), 7.43 – 7.35 (m, 7H), 4.45 (t,  $J$  = 6.4 Hz, 2H), 3.69 (s, 3H), 3.22 – 3.18 (m, 1H), 2.73 (dd,  $J$  = 15.2, 7.6 Hz, 1H), 2.61 (dd,  $J$  = 15.6, 7.2 Hz, 1H), 2.20 – 2.16 (m, 1H), 2.08 – 2.04 (m, 1H), 1.86 – 1.76 (m, 2H), 1.08 (s, 9H).  $^{13}\text{C}$  NMR (100 MHz,  $\text{CDCl}_3$ )  $\delta$  171.6, 162.7, 140.0, 136.7, 136.6, 135.5, 133.4, 129.4, 127.7, 127.1, 125.4, 125.0, 124.7, 122.5, 111.9, 82.1, 64.2, 51.8, 40.0, 31.2, 29.4, 27.0, 26.7, 18.4. HRMS:  $m/z$  (ESI) calculated  $[M+\text{Na}]^+$ : 591.1996, measured: 591.1996. IR (neat): 2940, 2870, 2338, 2170, 1751, 1737, 1550, 1429, 1170, 700  $\text{cm}^{-1}$ .

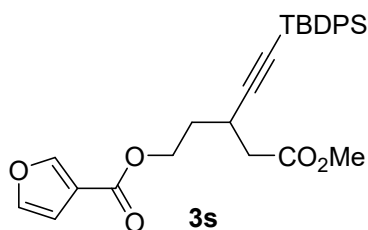

The crude material was purified by column chromatography on silica gel with a gradient eluent of petroleum ether and ethyl acetate (10:1 to 1:1) to get **3s** ( $R_f$  = 0.39, PE:EA = 3:1) (Yellow oil, 75.2 mg, 77%, 9:1).

$^1\text{H}$  NMR (400 MHz,  $\text{CDCl}_3$ )  $\delta$  7.77 – 7.75 (m, 4H), 7.57 (s, 1H), 7.39 – 7.34 (m, 6H), 7.19 (d,  $J$  = 3.2 Hz, 1H), 6.49 (d,  $J$  = 2.0 Hz, 1H), 4.61 – 4.52 (m, 2H), 3.69 (s, 3H), 3.32 – 3.28 (m, 1H), 2.73 (dd,  $J$  = 15.6, 8.0 Hz, 1H), 2.65 (dd,  $J$  = 15.6, 6.8 Hz, 1H), 2.12 – 2.01 (m, 2H), 1.05 (s, 9H).  $^{13}\text{C}$  NMR (100 MHz,  $\text{CDCl}_3$ )  $\delta$  171.5, 146.4, 135.5, 134.4, 133.3, 129.5, 127.7, 119.5, 118.1, 111.9, 110.8, 82.6, 62.6, 51.9, 39.8, 33.4, 27.0, 26.7, 18.5. HRMS:  $m/z$  (ESI) calculated  $[M+\text{Na}]^+$ : 511.1911, measured: 511.1913. IR (neat): 2928, 2855, 2169, 1735, 1484, 1452, 1326, 1152, 1107, 819, 747, 740  $\text{cm}^{-1}$ .

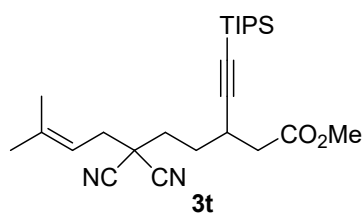

The crude material was purified by column chromatography on silica gel with a gradient eluent of petroleum ether and ethyl acetate (10:1 to 3:1) to get **3t** ( $R_f = 0.46$ , PE:EA = 3:1) (Yellow oil, 51.4 mg of 5:1 mixture, 50%, 5:1).  $^1\text{H}$  NMR (400 MHz,  $\text{CDCl}_3$ )  $\delta$  5.26 (t,  $J = 7.6$  Hz, 1H), 3.68 (s, 3H), 3.00 – 2.97 (m, 1H), 2.68 – 2.58 (m, 4H), 2.49 (dd,  $J = 15.2, 7.2$  Hz, 1H), 2.26 (td,  $J = 8.8, 4.0$  Hz, 1H), 2.04 – 1.89 (m, 2H), 1.80 – 1.68 (m, 7H), 1.12 – 0.95 (m, 21H).  $^{13}\text{C}$  NMR (100 MHz,  $\text{CDCl}_3$ )  $\delta$  171.2, 140.7, 115.4, 114.3, 107.7, 83.9, 51.8, 39.9, 37.5, 36.4, 34.8, 30.4, 28.8, 25.9, 18.5, 11.0. HRMS:  $m/z$  (ESI) calculated  $[\text{M}+\text{NH}_4]^+$ : 446.3197, measured: 446.3200. IR (neat): 2943, 2865, 2324, 1737, 1458, 1165, 910, 882, 731, 675  $\text{cm}^{-1}$ .

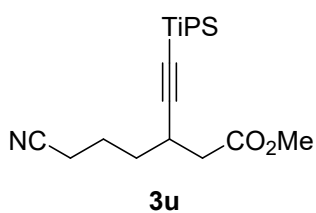

The crude material was purified by column chromatography on silica gel with a gradient eluent of petroleum ether and ethyl acetate (10:1 to 3:1) to get **3u**, ( $R_f = 0.50$ , PE:EA = 3:1) (Yellow oil, 46.2 mg of 6:1 mixture, 60%, 7:1).  $^1\text{H}$  NMR (400 MHz,  $\text{CDCl}_3$ )  $\delta$  3.67 (s, 3H), 2.95 – 2.89 (m, 1H), 2.56 (dd,  $J = 15.6, 8.0$  Hz, 1H), 2.45 (dd,  $J = 15.6, 8.0$  Hz, 1H), 2.40 (t,  $J = 7.2$  Hz, 2H), 1.95 – 1.90 (m, 1H), 1.84 – 1.76 (m, 1H), 1.72 – 1.64 (m, 1H), 1.61 – 1.54 (m, 1H), 1.07 – 0.94 (m, 21H).  $^{13}\text{C}$  NMR (100 MHz,  $\text{CDCl}_3$ )  $\delta$  171.5, 119.3, 108.5, 83.1, 51.7, 40.1, 33.2, 28.7, 23.2, 18.5, 16.8, 11.0. HRMS:  $m/z$  (ESI) calculated  $[\text{M}+\text{NH}_4]^+$ : 353.2619, measured: 353.2628. IR (neat): 2943, 2865, 2324, 1737, 1458, 1165, 910, 882, 731, 675  $\text{cm}^{-1}$ .

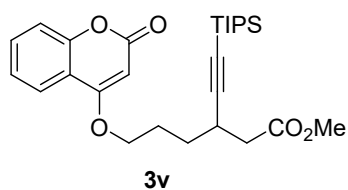

The crude material was purified by column chromatography on silica gel with a gradient eluent of petroleum ether and ethyl acetate (10:1 to 1:1) to get **3v** ( $R_f = 0.52$ , PE:EA = 1:1) (Pale yellow solid, 65.8 mg of 6:1 mixture, 60%, 6:1).  $^1\text{H}$  NMR (400 MHz,  $\text{CDCl}_3$ )  $\delta$  7.82 (d,  $J = 8.4$  Hz, 1H), 7.55 (t,  $J = 8.4$  Hz, 1H), 7.32 (d,  $J = 8.0$  Hz, 1H), 7.27 (t,  $J = 8.0$  Hz, 1H), 5.68 (s, 1H), 4.19

(t,  $J = 6.0$  Hz, 2H), 3.69 (s, 3H), 3.05 – 3.01 (m, 1H), 2.63 (dd,  $J = 15.6, 7.6$  Hz, 1H), 2.52 (dd,  $J = 15.6, 7.6$  Hz, 1H), 2.22 – 2.18 (m, 1H), 2.11 – 2.06 (m, 1H), 1.83 – 1.77 (m, 1H), 1.72 – 1.65 (m, 1H), 1.12 – 0.95 (m, 21H).  $^{13}\text{C}$  NMR (100 MHz,  $\text{CDCl}_3$ )  $\delta$  171.6, 165.5, 162.9, 153.3, 132.3, 123.8, 122.9, 116.7, 115.7, 109.0, 90.4, 82.8, 68.8, 51.7, 40.2, 31.1, 29.1, 26.3, 18.5, 11.0. HRMS:  $m/z$  (ESI) calculated  $[\text{M}+\text{H}]^+$ : 471.2561, measured: 471.2565. IR (neat): 2924, 2860, 2324, 2169, 1743, 1462, 1229, 1164, 1107, 918, 674, 660  $\text{cm}^{-1}$ .

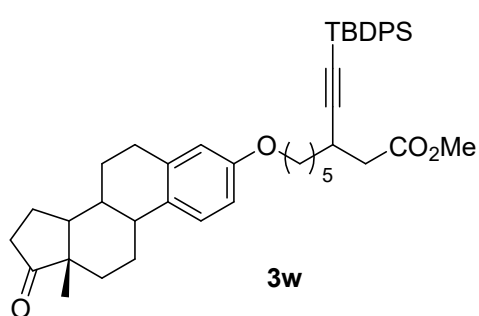

The crude material was purified by column chromatography on silica gel with a gradient eluent of petroleum ether and ethyl acetate (10:1 to 1:1) to get **3w** ( $R_f = 0.56$ , PE:EA = 2:1), (Yellow oil, 111.5 mg, 81%).  $^1\text{H}$  NMR (400 MHz,  $\text{CDCl}_3$ )  $\delta$  7.83 – 7.81 (m, 4H), 7.43 – 7.36 (m, 6H), 7.20 (d,  $J = 8.8$  Hz, 1H), 6.72 (d,  $J = 8.4$  Hz, 1H), 6.66 (s, 1H), 3.96 (t,  $J = 6.8$  Hz, 2H), 3.72 (s, 3H), 3.13 – 3.10 (m, 1H), 2.92 – 2.88 (m, 2H), 2.69 (dd,  $J = 15.6, 7.2$  Hz, 1H), 2.61 – 2.48 (m, 2H), 2.44 – 2.40 (m, 1H), 2.29 – 1.96 (m, 5H), 1.86 – 1.42 (m, 14H), 1.06 (s, 9H), 0.93 (s, 3H).  $^{13}\text{C}$  NMR (100 MHz,  $\text{CDCl}_3$ )  $\delta$  220.8, 171.8, 157.0, 137.6, 135.4, 133.5, 131.7, 129.3, 127.5, 126.2, 114.4, 112.6, 112.0, 81.2, 67.6, 51.7, 50.3, 47.9, 43.9, 39.9, 38.3, 35.8, 34.3, 31.5, 29.55, 29.5, 29.2, 27.0, 26.9, 26.5, 25.8, 25.7, 21.5, 18.4, 13.8. HRMS:  $m/z$  (ESI) calculated  $[\text{M}+\text{NH}_4]^+$ : 706.4286, measured: 706.4303. IR (neat): 2929, 2856, 2338, 2170, 1736, 1499, 1429, 1158, 1107, 818, 700  $\text{cm}^{-1}$ .

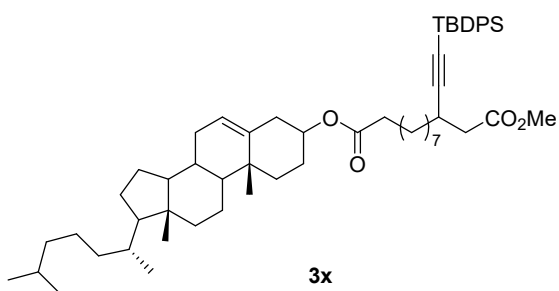

The crude material was purified by column chromatography on silica gel with a gradient eluent of petroleum ether and ethyl acetate (10:1 to 3:1) to get **3x** ( $R_f = 0.64$ , PE:EA = 3:1) (Yellow oil, 110.1 mg, 63%).  $^1\text{H}$  NMR (400 MHz,  $\text{CDCl}_3$ )  $\delta$  7.80

– 7.78 (m, 4H), 7.41 – 7.34 (m, 6H), 5.38 – 5.37 (m, 1H), 4.63 – 4.61 (m, 1H), 3.69 (s, 3H), 3.09 – 3.04 (m, 1H), 2.65 (dd,  $J = 14.8, 7.6$  Hz, 1H), 2.55 (dd,  $J = 15.6, 6.8$  Hz, 1H), 2.32 – 2.24 (m, 4H), 2.03 – 1.96 (m, 2H), 1.87 – 1.84 (m, 3H), 1.60 – 0.86 (m, 56H), 0.68 (s, 3H).  $^{13}\text{C}$  NMR (100 MHz,  $\text{CDCl}_3$ )  $\delta$  173.2, 171.9, 139.7, 135.5, 133.6, 129.3, 127.6, 120.6, 112.8, 81.1, 73.6, 56.6, 56.1, 51.7, 50.0, 42.3, 40.0, 39.7, 39.5, 38.1, 37.0, 36.6, 36.2, 35.8, 34.7, 34.5, 31.9, 31.8, 29.6, 29.3, 29.2, 29.1, 28.2, 28.0, 27.8, 27.2, 27.0, 25.0, 24.3, 23.8, 22.8, 22.6, 21.0, 19.3, 18.7, 18.4, 11.8. HRMS:  $m/z$  (ESI) calculated  $[\text{M}+\text{NH}_4]^+$ : 892.6634, measured: 892.6656. IR (neat): 2930, 2854, 2171, 1734, 1464, 1430, 1166, 1108, 740, 699  $\text{cm}^{-1}$ .

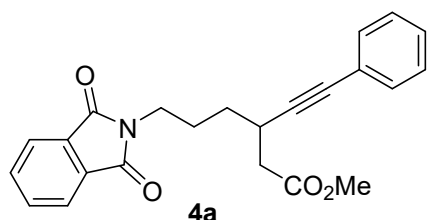

The crude material was purified by column chromatography on silica gel with a gradient eluent of petroleum ether and ethyl acetate (10:1 to 3:1) to get **4a** ( $R_f = 0.37$ , PE:EA = 3:1) (Yellow oil, 42.1 mg, 56%).  $^1\text{H}$  NMR (400 MHz,  $\text{CDCl}_3$ )  $\delta$  7.85 – 7.83 (m, 2H), 7.72 – 7.70 (m, 2H), 7.37 – 7.36 (m, 2H), 7.26 (br, 3H), 3.75 (t,  $J = 7.2$  Hz, 2H), 3.70 (s, 3H), 3.15 – 3.11 (m, 1H), 2.63 (dd,  $J = 15.6, 7.6$  Hz, 1H), 2.53 (dd,  $J = 15.2, 6.8$  Hz, 1H), 2.02 – 1.98 (m, 1H), 1.91 – 1.84 (m, 1H), 1.70 – 1.57 (m, 2H).  $^{13}\text{C}$  NMR (100 MHz,  $\text{CDCl}_3$ )  $\delta$  171.8, 168.4, 133.9, 132.1, 131.6, 128.1, 127.9, 123.3, 123.2, 90.4, 82.6, 51.8, 39.9, 37.6, 31.7, 28.6, 26.4. HRMS:  $m/z$  (ESI) calculated  $[\text{M}+\text{NH}_4]^+$ : 393.1809, measured: 393.1820. IR (neat): 2948, 2321, 1771, 1736, 1707, 1490, 1395, 1361, 882, 719  $\text{cm}^{-1}$ .

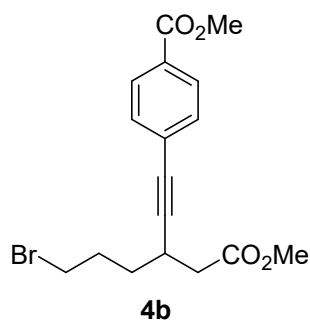

The crude material was purified by column chromatography on silica gel with a gradient eluent of petroleum ether and ethyl acetate (20:1 to 5:1) to get **4b** ( $R_f = 0.58$ , PE:EA = 5:1), (Yellow oil, 51.3 mg, 70%).  $^1\text{H}$  NMR (400 MHz,  $\text{CDCl}_3$ )  $\delta$  7.95 (d,  $J = 6.4$  Hz, 2H), 7.43 (d,  $J = 8.4$  Hz, 2H), 3.90 (s, 3H), 3.72 (s, 3H), 3.47 (td,  $J = 6.8, 2.0$  Hz, 2H), 3.15 – 3.11 (m, 1H), 2.66 (dd,  $J = 15.6, 7.2$  Hz, 1H), 2.55 (dd,  $J = 15.6, 7.2$  Hz, 1H), 2.18 – 2.02 (m, 1H).

(m, 2H), 1.82 – 1.75 (m, 1H), 1.72 – 1.64 (m, 1H).  $^{13}\text{C}$  NMR (100 MHz,  $\text{CDCl}_3$ )  $\delta$  171.6, 166.5, 131.6, 129.4, 129.2, 127.9, 93.7, 52.2, 51.9, 39.7, 33.2, 32.3, 30.4, 28.3. HRMS:  $m/z$  (ESI) calculated  $[\text{M}+\text{H}]^+$ : 367.0539, measured: 367.0545. IR (neat): 2950, 1718, 1604, 1434, 1271, 1171, 1107, 857, 768, 695  $\text{cm}^{-1}$ .

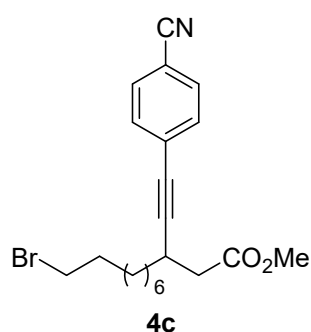

The crude material was purified by column chromatography on silica gel with a gradient eluent of petroleum ether and ethyl acetate (20:1 to 5:1) to get **4c** ( $R_f$  = 0.64, PE:EA = 5:1) (Yellow oil, 64.4 mg, 80%).  $^1\text{H}$  NMR (400 MHz,  $\text{CDCl}_3$ )  $\delta$  7.56 (d,  $J$  = 8.0 Hz, 2H), 7.44 (d,  $J$  = 7.6 Hz, 2H), 3.70 (s, 3H), 3.39 (t,  $J$  = 6.8 Hz, 2H), 3.09 – 3.06 (m, 1H), 2.60 (dd,  $J$  = 15.2, 7.6 Hz, 1H), 2.52 (dd,  $J$  = 15.6, 6.8 Hz, 1H), 1.87 – 1.80 (m, 2H), 1.56 – 1.31 (m, 12H).  $^{13}\text{C}$  NMR (100 MHz,  $\text{CDCl}_3$ )  $\delta$  171.8, 132.1, 131.8, 128.5, 118.5, 111.0, 96.4, 80.8, 51.8, 39.6, 34.8, 34.0, 32.7, 29.2, 29.0, 28.9, 28.6, 28.0, 27.1. HRMS:  $m/z$  (ESI) calculated  $[\text{M}+\text{H}]^+$ : 404.1220, measured: 404.1208. IR (neat): 2928, 2855, 2227, 1734, 1711, 1603, 1435, 1203, 1168, 1017, 839, 641  $\text{cm}^{-1}$ .

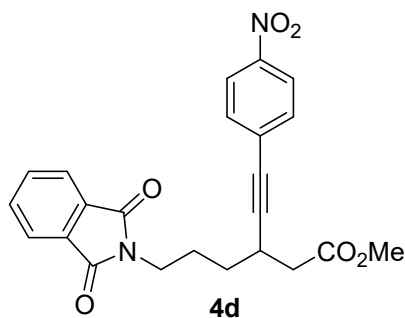

The crude material was purified by column chromatography on silica gel with a gradient eluent of petroleum ether and ethyl acetate (10:1 to 1:1) to get **4d** ( $R_f$  = 0.44, PE:EA = 2:1) (Yellow oil, 63.8 mg, 76%).  $^1\text{H}$  NMR (400 MHz,  $\text{CDCl}_3$ )  $\delta$  8.14 (d,  $J$  = 8.8 Hz, 2H), 7.85 – 7.82 (m, 2H), 7.74 – 7.70 (m, 2H), 7.50 (d,  $J$  = 9.2 Hz, 2H), 3.75 (t,  $J$  = 7.2 Hz, 2H), 3.71 (s, 3H), 3.18 – 3.14 (m, 1H), 2.63 (dd,  $J$  = 16.0, 8.0 Hz, 1H), 2.54 (dd,  $J$  = 16.0, 8.0 Hz, 1H), 2.02 – 1.95 (m, 2H), 1.69 – 1.57 (m, 2H).  $^{13}\text{C}$  NMR (100 MHz,  $\text{CDCl}_3$ )  $\delta$  171.4, 168.3, 146.7, 133.9, 132.4, 132.0, 130.2, 123.4, 123.2, 96.4, 81.1, 51.8, 39.7, 37.5, 31.4, 28.6, 26.3. HRMS:  $m/z$  (ESI) calculated  $[\text{M}+\text{NH}_4]^+$ : 438.1660, measured: 438.1662. IR (neat): 2948, 1771, 1706, 1593, 1515, 1395, 1339, 1168, 853, 718  $\text{cm}^{-1}$ .

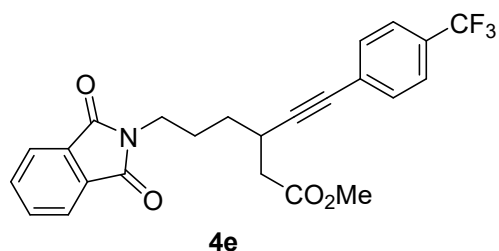

The crude material was purified by column chromatography on silica gel with a gradient eluent of petroleum ether and ethyl acetate (10:1 to 3:1) to get **4e** ( $R_f$  = 0.53, PE:EA = 3:1) (Pale yellow oil, 65.6 mg, 74%).  $^1\text{H}$  NMR

(400 MHz,  $\text{CDCl}_3$ )  $\delta$  7.84 – 7.83 (m, 2H), 7.72 – 7.71 (m, 2H), 7.52 (d,  $J$  = 8.4 Hz, 2H), 7.46 (d,  $J$  = 8.0 Hz, 2H), 3.75 (t,  $J$  = 7.2 Hz, 2H), 3.70 (s, 3H), 3.16 – 3.13 (m, 1H), 2.63 (dd,  $J$  = 15.2, 7.6 Hz, 1H), 2.53 (dd,  $J$  = 15.6, 7.6 Hz, 1H), 2.02 – 1.97 (m, 1H), 1.91 – 1.84 (m, 1H), 1.70 – 1.56 (m, 2H).  $^{19}\text{F}$  NMR (376 MHz)  $\delta$  -62.8 (s).  $^{13}\text{C}$  NMR (100 MHz,  $\text{CDCl}_3$ )  $\delta$  171.5, 168.3, 133.9, 132.0, 131.8, 129.3, 127.1, 125.0 (q,  $J$  = 3.8 Hz), 123.9 (q,  $J$  = 271.0 Hz), 123.1, 93.2, 81.4, 51.9, 51.7, 39.5, 37.5, 31.5, 28.5, 26.3. HRMS:  $m/z$  (ESI) calculated  $[\text{M}+\text{NH}_4]^+$ : 461.1683, measured: 461.1688. IR (neat): 2944, 1712, 1438, 1398, 1324, 1167, 1067, 845, 721  $\text{cm}^{-1}$ .

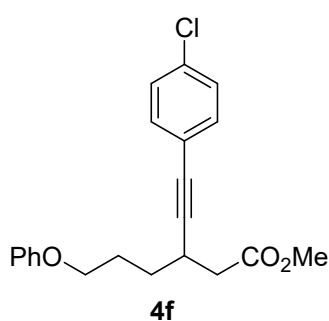

The crude material was purified by column chromatography on silica gel with a gradient eluent of petroleum ether and ethyl acetate (10:1 to 3:1) to get **4f** ( $R_f$  = 0.49, PE:EA = 3:1) (Yellow oil, 34.9 mg, 49%).  $^1\text{H}$  NMR (400 MHz,  $\text{CDCl}_3$ )  $\delta$  7.32 – 7.23 (m, 6H), 6.96 – 6.85 (m, 3H), 4.02 (t,  $J$  = 6.4 Hz, 2H), 3.71 (s, 3H), 3.18 –

3.11 (m, 1H), 2.65 (dd,  $J$  = 15.6, 7.6 Hz, 1H), 2.56 (dd,  $J$  = 15.6, 6.8 Hz, 1H), 2.12 – 2.03 (m, 1H), 1.99 – 1.92 (m, 1H), 1.85 – 1.77 (m, 1H), 1.74 – 1.65 (m, 1H).  $^{13}\text{C}$  NMR (100 MHz,  $\text{CDCl}_3$ )  $\delta$  171.8, 158.9, 133.8, 132.9, 129.4, 128.5, 121.9, 120.6, 114.4, 91.9, 81.5, 67.2, 51.8, 39.9, 31.1, 28.7, 27.1. HRMS:  $m/z$  (ESI) calculated  $[\text{M}+\text{NH}_4]^+$ : 374.1517, measured: 374.1522. IR (neat): 2949, 1735, 1599, 1489, 1395, 1241, 1166, 1088, 827, 752, 690  $\text{cm}^{-1}$ .

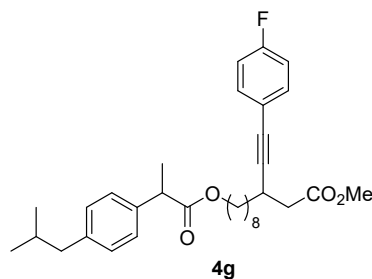

The crude material was purified by column chromatography on silica gel with a gradient eluent of petroleum ether and ethyl acetate (10:1 to 5:1) to

S26

get **4g** ( $R_f = 0.58$ , PE:EA = 5:1) (Yellow oil, 50.1 mg, 48%).  $^1\text{H}$  NMR (400 MHz,  $\text{CDCl}_3$ )  $\delta$  7.37 – 7.33 (m, 2H), 7.20 (d,  $J = 8.4$  Hz, 2H), 7.08 (d,  $J = 8.0$  Hz, 2H), 6.96 (dd,  $J = 8.8, 8.4$  Hz, 2H), 4.04 (t,  $J = 6.8$  Hz, 2H), 3.71 (s, 3H), 3.67 (q,  $J = 7.2$  Hz, 1H), 3.07 – 3.06 (m, 1H), 2.66 (dd,  $J = 15.2, 8.0$  Hz, 1H), 2.55 (dd,  $J = 15.2, 6.8$  Hz, 1H), 2.43 (d,  $J = 7.2$  Hz, 2H), 1.85 – 1.82 (m, 1H), 1.60 – 1.49 (m, 9H), 1.34 – 1.25 (m, 8H), 0.89 (d,  $J = 6.4$  Hz, 6H).  $^{19}\text{F}$  NMR (376 MHz,  $\text{CDCl}_3$ )  $\delta$  -112.1.  $^{13}\text{C}$  NMR (100 MHz,  $\text{CDCl}_3$ )  $\delta$  174.8, 172.0, 161.8 (d,  $J = 247.5$  Hz), 140.4, 137.9, 133.4 (d,  $J = 7.6$  Hz), 129.2, 127.1, 119.6 (d,  $J = 3.8$  Hz), 115.3 (d, 22.0 Hz), 91.0, 81.0, 64.7, 51.7, 45.2, 45.0, 40.0, 34.6, 30.1, 29.3, 29.2, 29.1, 28.8, 28.5, 27.2, 25.7, 22.3, 18.4. HRMS:  $m/z$  (ESI) calculated  $[\text{M}+\text{NH}_4]^+$ : 540.3484, measured: 540.3473. IR (neat): 2929, 2856, 1730, 1506, 1461, 1222, 1157, 1116, 837, 732  $\text{cm}^{-1}$ .

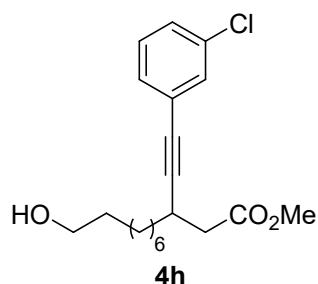

The crude material was purified by column chromatography on silica gel with a gradient eluent of petroleum ether and ethyl acetate (10:1 to 1:1) to get **4h** ( $R_f = 0.35$ , PE:EA = 2:1) (Yellow oil, 38.5 mg, 55%).  $^1\text{H}$  NMR (400 MHz,  $\text{CDCl}_3$ )  $\delta$  7.37 – 7.36 (m, 1H), 7.27 – 7.18 (m, 3H), 3.72 (s, 3H), 3.63 (t,  $J = 6.8$  Hz, 2H), 3.07 – 3.04 (m, 1H), 2.61 (dd,  $J = 15.6, 8.0$  Hz, 1H), 2.52 (dd,  $J = 15.6, 7.2$  Hz, 1H), 1.57 – 1.51 (m, 5H), 1.33 (m, 10H).  $^{13}\text{C}$  NMR (100 MHz,  $\text{CDCl}_3$ )  $\delta$  172.0, 133.9, 131.5, 129.7, 129.3, 128.0, 125.3, 92.8, 80.8, 62.9, 51.7, 39.8, 34.5, 32.7, 29.4, 29.3, 29.1, 28.8, 27.1, 25.6. HRMS:  $m/z$  (ESI) calculated  $[\text{M}+\text{NH}_4]^+$ : 368.1987, measured: 368.1993. IR (neat): 3349, 2926, 2854, 1736, 1592, 1436, 1165, 1054, 879, 682  $\text{cm}^{-1}$ .

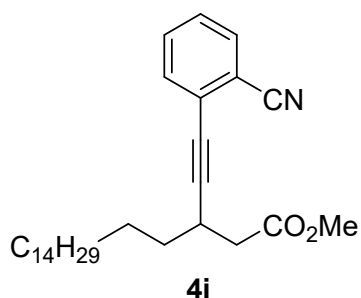

The crude material was purified by column chromatography on silica gel with a gradient eluent of petroleum ether and ethyl acetate (10:1 to 1:1) to get **4i** ( $R_f = 0.64$ , PE:EA = 10:1) (Yellow oil, 64.5 mg, 74%).  $^1\text{H}$  NMR (400 MHz,  $\text{CDCl}_3$ )  $\delta$  7.60 (d,  $J = 7.6$  Hz, 1H), 7.52 – 7.46 (m, 2H), 7.35 (td,  $J = 8.0, 2.4$  Hz, 1H), 3.72

(s, 3H), 3.16 – 3.12 (m, 1H), 2.68 (dd,  $J = 15.6, 8.0$  Hz, 1H), 2.55 (dd,  $J = 16.0, 6.8$  Hz, 1H), 1.68 – 1.48 (m, 4H), 1.29 – 1.24 (m, 26H), 0.87 (t,  $J = 6.4$  Hz, 1H).  $^{13}\text{C}$  NMR (100 MHz,  $\text{CDCl}_3$ )  $\delta$  171.8, 132.4, 132.3, 132.1, 127.8, 127.5, 117.5, 115.4, 98.9, 78.5, 51.8, 39.5, 34.3, 31.9, 29.7, 29.6, 29.57, 29.4, 29.3, 29.2, 29.0, 27.1, 22.6, 14.1. HRMS:  $m/z$  (ESI) calculated  $[\text{M}+\text{NH}_4]^+$ : 455.3632, measured: 455.3644. IR (neat): 2914, 2849, 1733, 1594, 1469, 1247, 1168, 1021, 766, 736  $\text{cm}^{-1}$ .

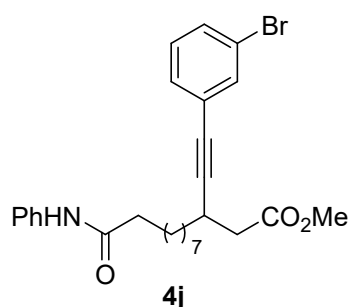

The crude material was purified by column chromatography on silica gel with a gradient eluent of petroleum ether and ethyl acetate (10:1 to 1:1) to get **4j** ( $R_f = 0.43$ , PE:EA = 3:1), (Yellow oil, 46.8 mg, 47%).  $^1\text{H}$  NMR (400 MHz,  $\text{CDCl}_3$ ) 7.52 – 7.51 (m, 3H), 7.44 (br, 1H), 7.39 (d,  $J = 8.0$  Hz, 1H), 7.31 – 7.27 (m, 3H), 7.13 (t,  $J = 8.0$  Hz, 1H), 7.08 (t,  $J = 7.6$  Hz, 1H), 3.72 (s, 3H), 3.06 – 3.03 (m, 1H), 2.60 (dd,  $J = 15.2, 7.6$  Hz, 1H), 2.51 (dd,  $J = 15.6, 7.2$  Hz, 1H), 2.33 (t,  $J = 7.6$  Hz, 2H), 1.73 – 1.67 (m, 2H), 1.56 – 1.24 (m, 14H).  $^{13}\text{C}$  NMR (100 MHz,  $\text{CDCl}_3$ ) 172.0, 171.5, 138.0, 134.3, 130.8, 130.2, 129.6, 128.9, 125.5, 124.0, 121.9, 119.7, 92.9, 80.6, 51.7, 39.8, 34.4, 29.2, 29.18, 29.1, 29.09, 28.8, 27.1, 25.5. HRMS:  $m/z$  (ESI) calculated  $[\text{M}+\text{H}]^+$ :

498.1638, measured: 498.1647. IR (neat): 2949, 1735, 1599, 1489, 1395, 1241, 1166, 1088, 827, 752, 690  $\text{cm}^{-1}$ .

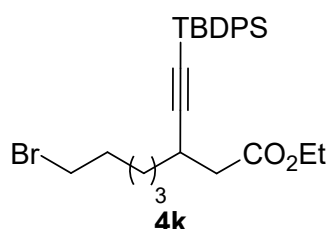

The crude material was purified by column chromatography on silica gel with a gradient eluent of petroleum ether and ethyl acetate (30:1 to 10:1) to get **4k** ( $R_f = 0.68$ , PE:EA = 10:1) (Yellow oil, 71.7 mg, 70%).  $^1\text{H}$  NMR (400 MHz,  $\text{CDCl}_3$ )  $\delta$  7.82 – 7.79 (m, 4H), 7.43 – 7.36 (m, 6H), 4.17 (q,  $J = 6.8$  Hz, 2H), 3.41 (t,  $J = 6.8$  Hz, 2H), 3.11 – 3.07 (m, 1H), 2.68 (dd,  $J = 15.6, 8.0$  Hz, 1H), 2.55 (dd,  $J = 15.6, 7.2$  Hz, 1H), 1.93 – 1.86 (m, 2H), 1.70 – 1.49 (m, 6H), 1.25 (t,  $J = 7.2$  Hz, 3H), 1.06 (s, 9H).  $^{13}\text{C}$  NMR (100 MHz,  $\text{CDCl}_3$ )  $\delta$

171.3, 135.5, 133.5, 129.4, 127.6, 112.6, 81.3, 60.6, 40.2, 34.2, 33.6, 32.6, 29.4, 27.7,

27.0, 26.4, 18.4, 14.2. HRMS:  $m/z$  (ESI) calculated  $[M+NH_4]^+$ : 530.2084, measured: 530.2079. IR (neat): 2928, 2855, 2324, 2169, 1737, 1430, 1166, 1107.

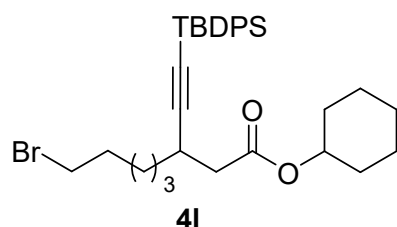

The crude material was purified by column chromatography on silica gel with a gradient eluent of petroleum ether and ethyl acetate (30:1 to 10:1) to get **4l** ( $R_f$  = 0.71, PE:EA = 10:1), (Yellow oil, 60.1 mg, 53%).  $^1H$  NMR (400 MHz,  $CDCl_3$ )  $\delta$  7.78 – 7.76 (m, 4H), 7.41 – 7.34 (m, 6H), 4.79 – 4.76 (m, 1H), 3.40 (t,  $J$  = 6.4 Hz, 2H), 3.08 – 3.06 (m, 1H), 2.65 (dd,  $J$  = 15.2, 7.2 Hz, 1H), 2.51 (dd,  $J$  = 14.8, 7.2 Hz, 1H), 1.92 – 1.81 (m, 2H), 1.68 – 1.11 (m, 16H), 1.07 (s, 9H).  $^{13}C$  NMR (100 MHz,  $CDCl_3$ )  $\delta$  170.8, 135.6, 133.6, 129.4, 127.6, 112.7, 81.3, 73.0, 40.5, 34.3, 33.7, 32.7, 29.5, 27.8, 27.0, 26.4, 21.8, 18.5. HRMS:  $m/z$  (ESI) calculated  $[M+NH_4]^+$ : 584.2554, measured: 584.2552. IR (neat): 2931, 2856, 2170, 1729, 1451, 1172, 1112, 740, 699  $cm^{-1}$ .

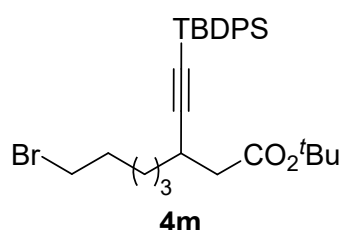

The crude material was purified by column chromatography on silica gel with a gradient eluent of petroleum ether and ethyl acetate (30:1 to 10:1) to get **4m** ( $R_f$  = 0.69, PE:EA = 10:1) (Yellow oil, 65.9 mg, 61%).  $^1H$  NMR (400 MHz,  $CDCl_3$ )  $\delta$  7.81 – 7.75 (m, 4H), 7.44 – 7.36 (m, 6H), 3.41 (t,  $J$  = 6.8 Hz, 2H), 3.05 – 3.01 (m, 1H), 2.60 (dd,  $J$  = 15.6, 7.6 Hz, 1H), 2.45 (dd,  $J$  = 15.2, 7.2 Hz, 1H), 1.92 – 1.85 (m, 2H), 1.67 – 1.45 (m, 15H), 1.07 (s, 9H).  $^{13}C$  NMR (100 MHz,  $CDCl_3$ )  $\delta$  170.6, 135.5, 133.6, 129.3, 127.6, 113.0, 81.0, 80.8, 41.3, 34.2, 33.7, 32.7, 29.4, 28.1, 27.8, 27.0, 26.4, 18.5. HRMS:  $m/z$  (ESI) calculated  $[M+NH_4]^+$ : 558.2397, measured: 558.2395. IR (neat): 2930, 2856, 2170, 1728, 1427, 1391, 1149, 1107, 741, 699  $cm^{-1}$ .

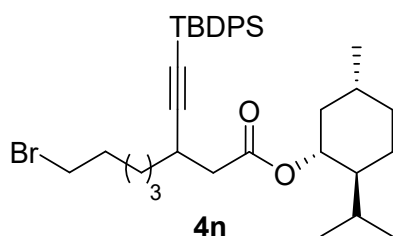

The crude material was purified by column chromatography on silica gel with a gradient eluent of petroleum ether and ethyl acetate (30:1 to 10:1) to get

**4n** ( $R_f = 0.72$ , PE:EA = 10:1) (Yellow oil, 87.2 mg, 70%, dr 1:1).  $^1\text{H}$  NMR (400 MHz,  $\text{CDCl}_3$ )  $\delta$  7.81 – 7.78 (m, 4H), 7.44 – 7.36 (m, 6H), 4.76 – 4.69 (m, 1H), 3.40 (t,  $J = 6.8$  Hz, 2H), 3.10 – 3.06 (m, 1H), 2.73 – 2.66 (m, 1H), 2.56 – 2.49 (m, 1H), 2.01 – 1.85 (m, 4H), 1.71 – 1.34 (m, 10H), 1.17 – 0.99 (m, 12H), 0.92 – 0.72 (m, 9H).  $^{13}\text{C}$  NMR (100 MHz,  $\text{CDCl}_3$ )  $\delta$  170.9, 135.5, 133.6, 129.3, 127.6, 112.7, 81.2, 74.6, 46.9, 40.9, 40.4, 34.3, 34.2, 33.6, 32.6, 31.3, 29.4, 27.8, 27.0, 26.4, 26.2, 23.3, 21.9, 20.7, 18.5, 16.2. HRMS:  $m/z$  (ESI) calculated  $[\text{M}+\text{NH}_4]^+$ : 640.3180, measured: 640.3177. IR (neat): 2929, 2857, 2322, 2172, 1729, 1428, 1175, 1108, 741, 699  $\text{cm}^{-1}$ .

## 5. $^1\text{H}$ NMR, $^{13}\text{C}$ NMR and $^{19}\text{F}$ NMR spectra

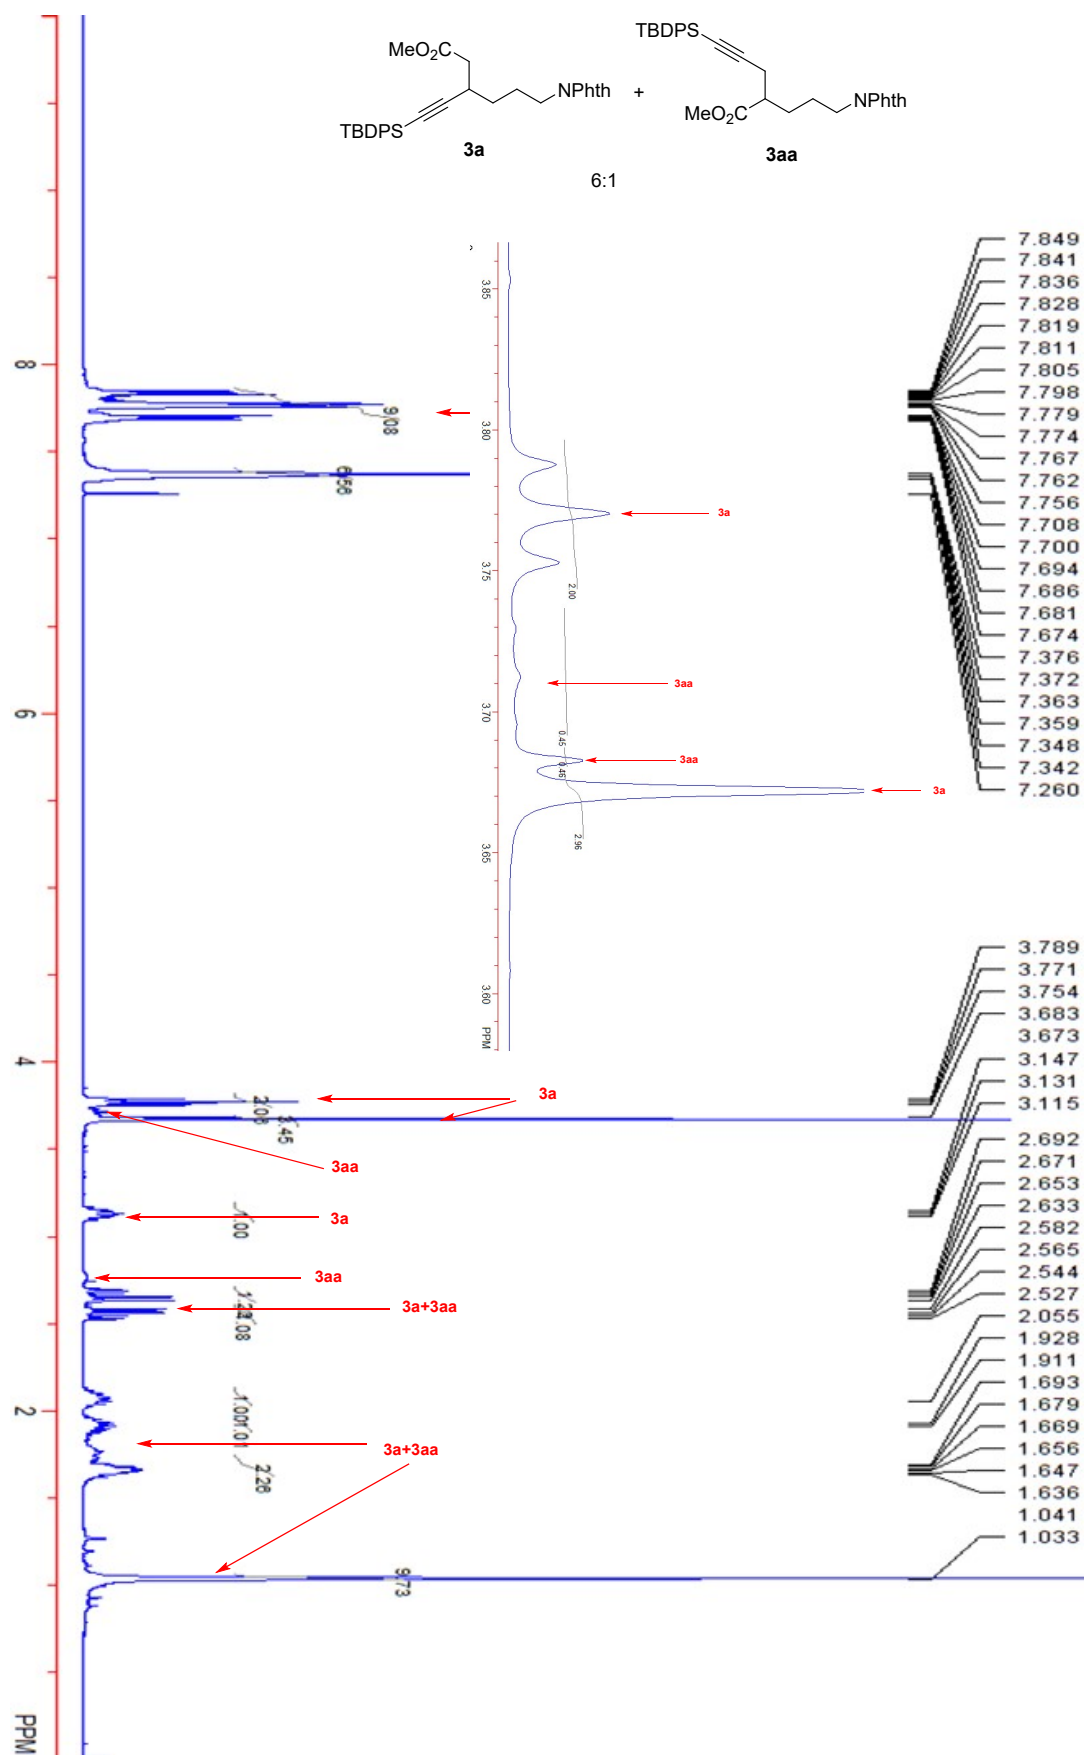

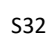

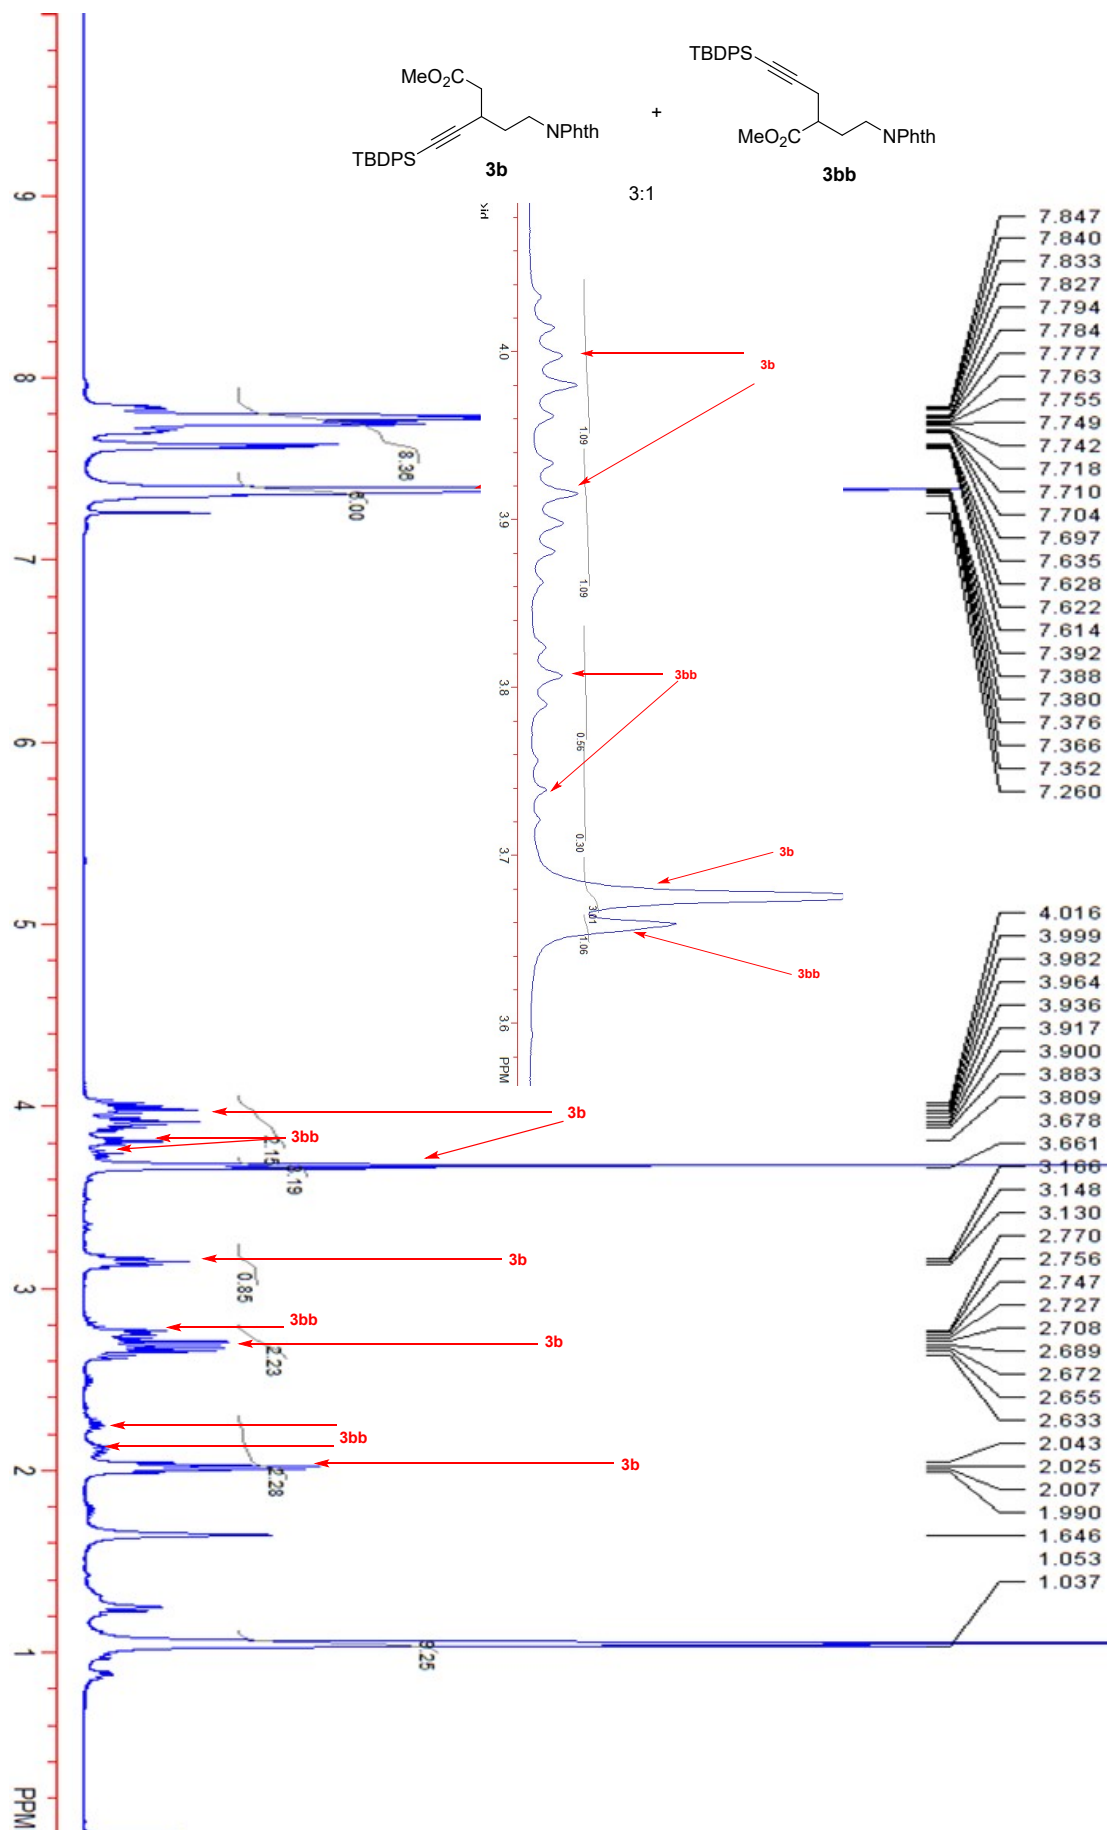

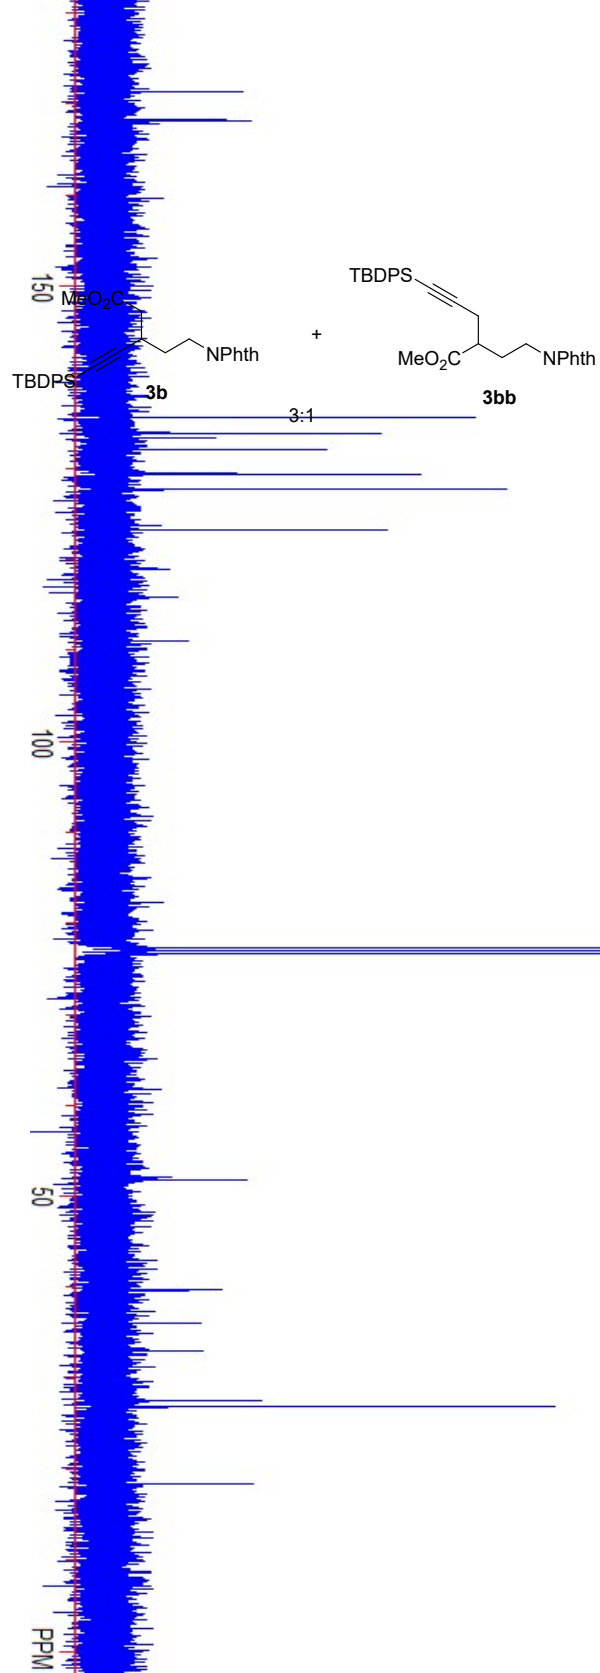

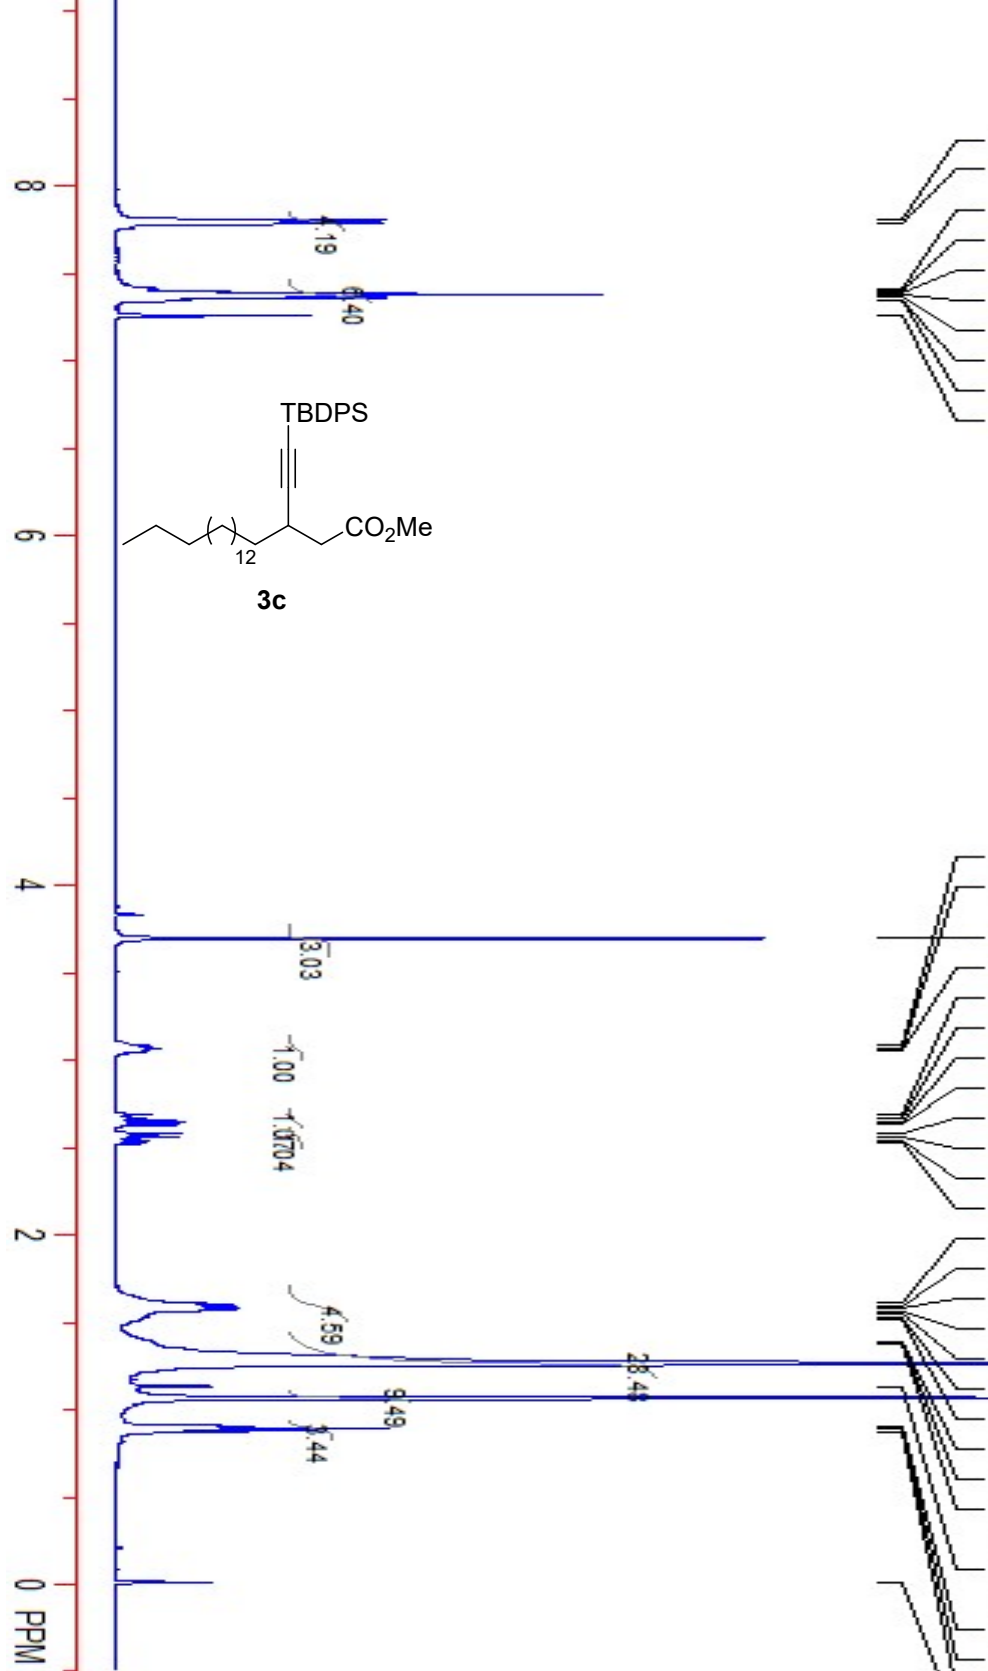

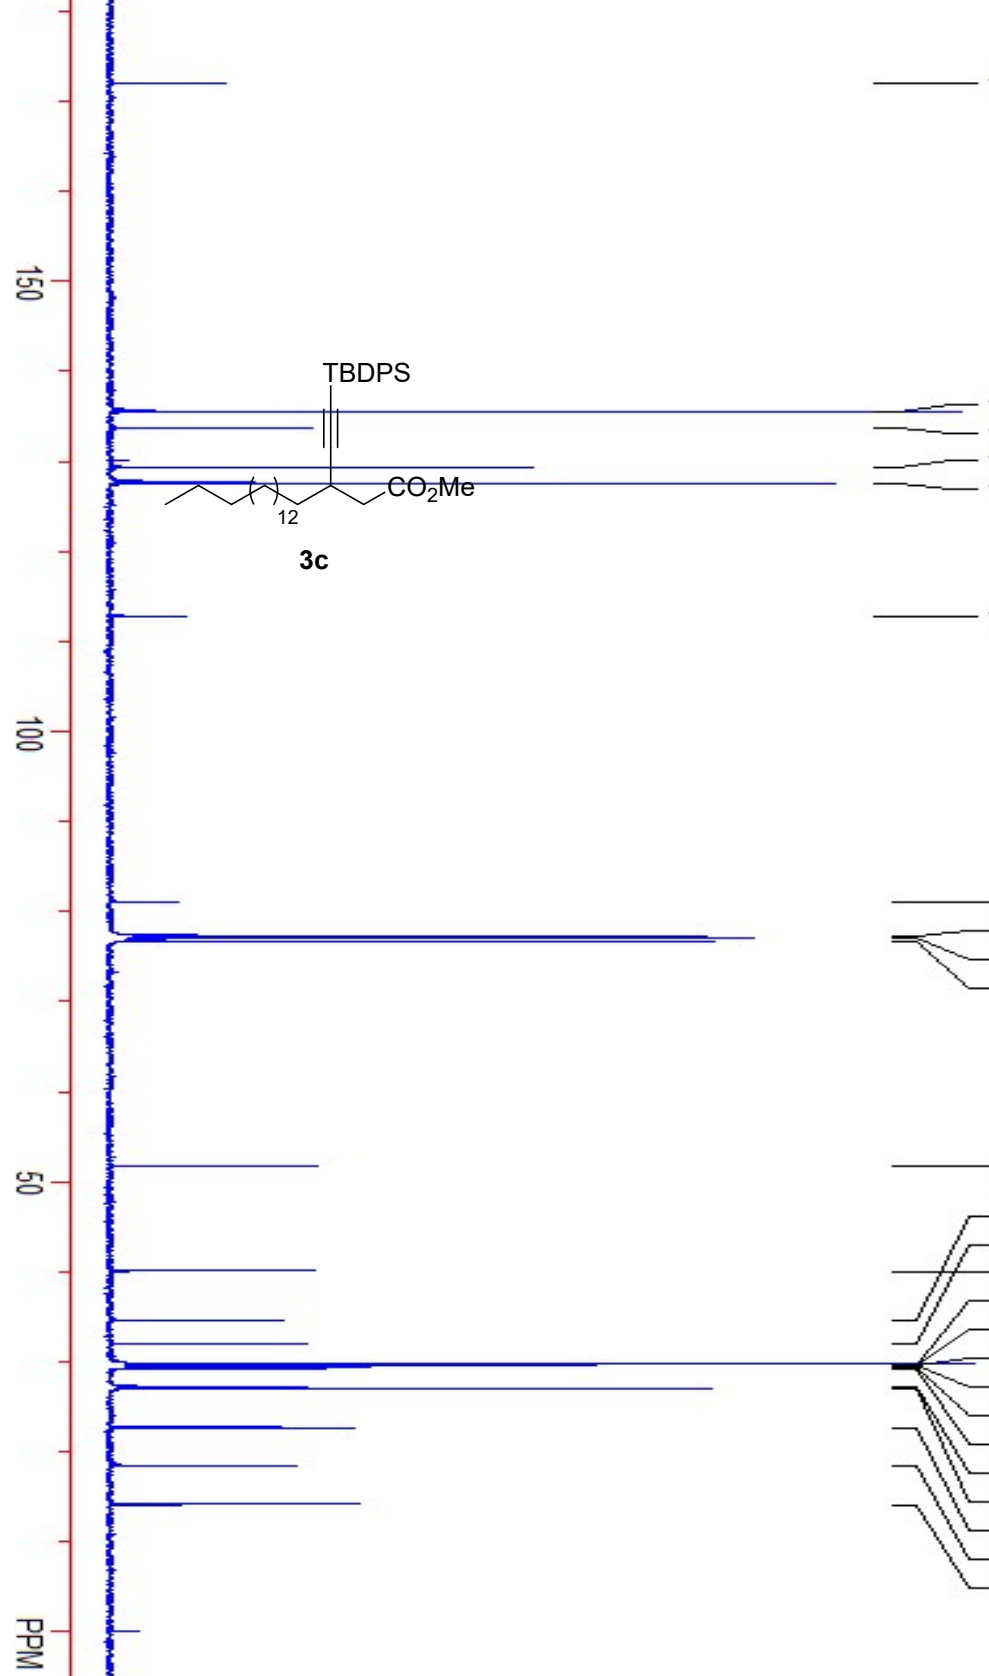

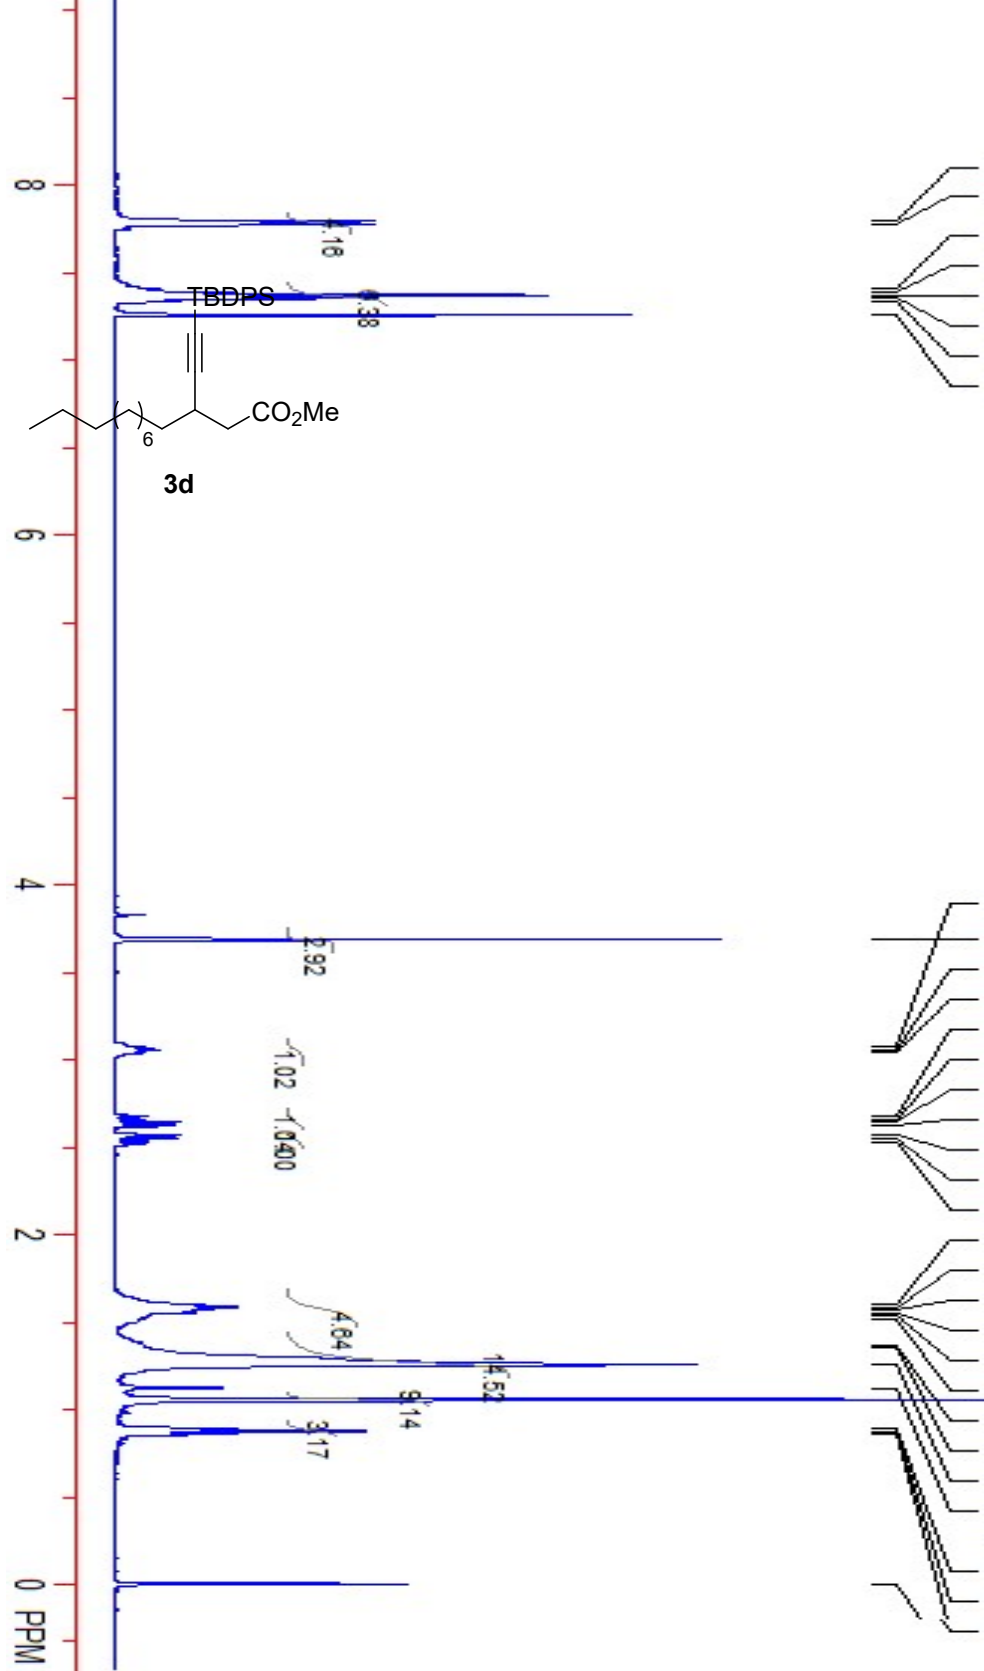

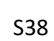

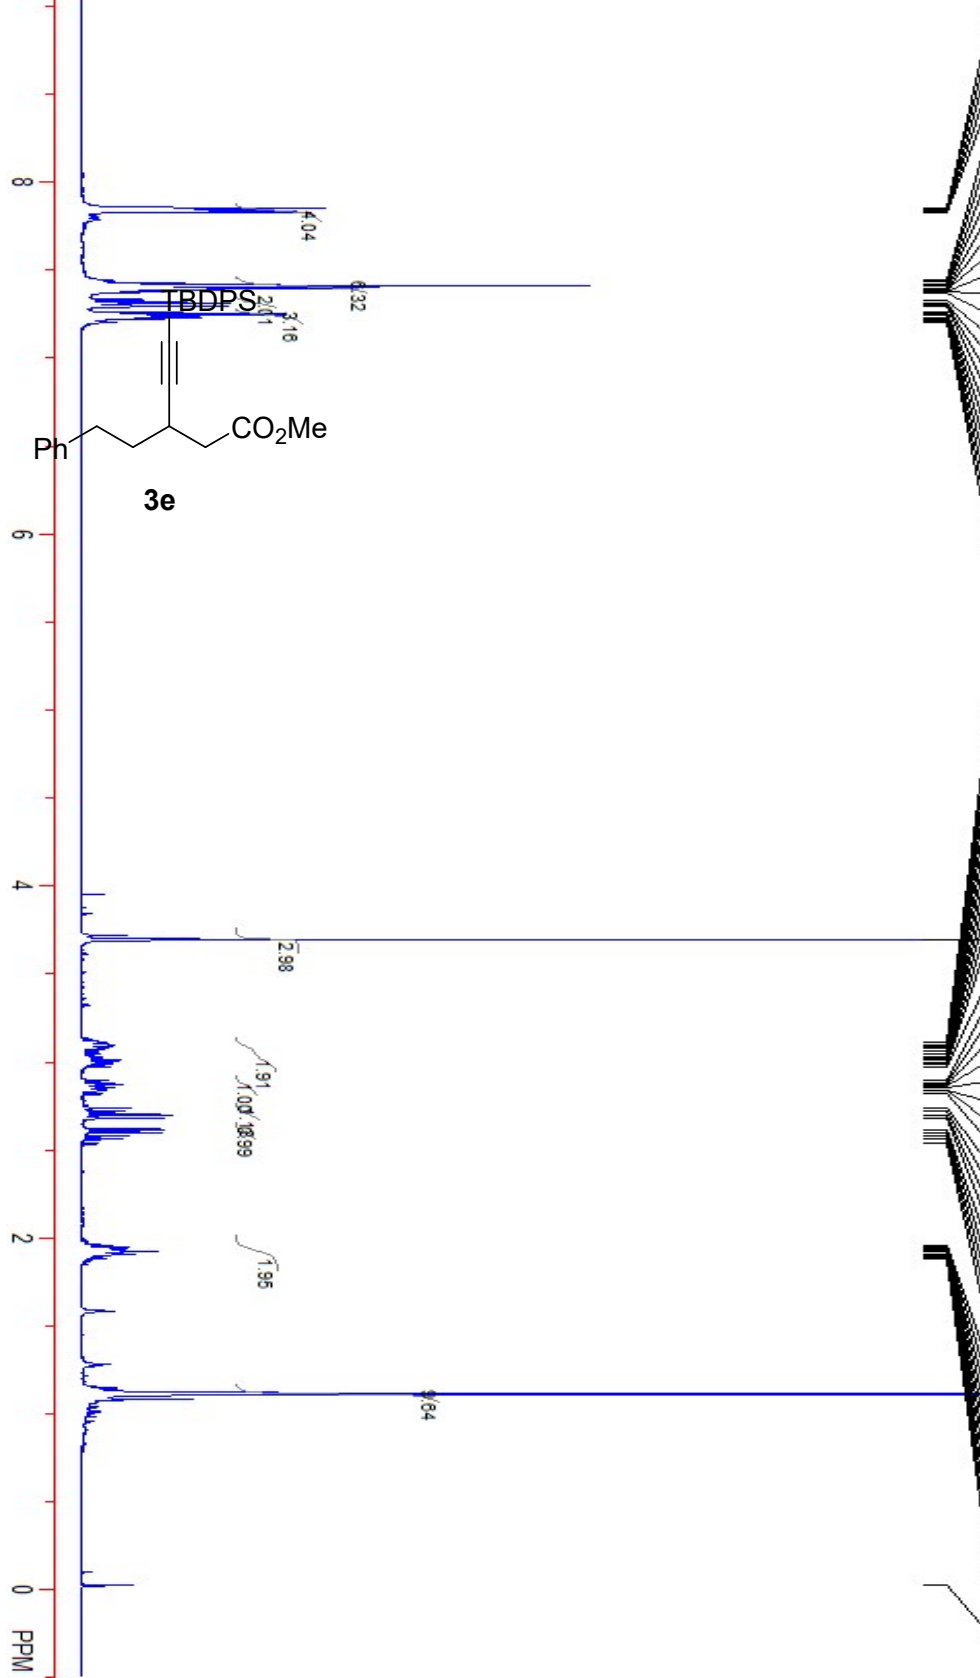

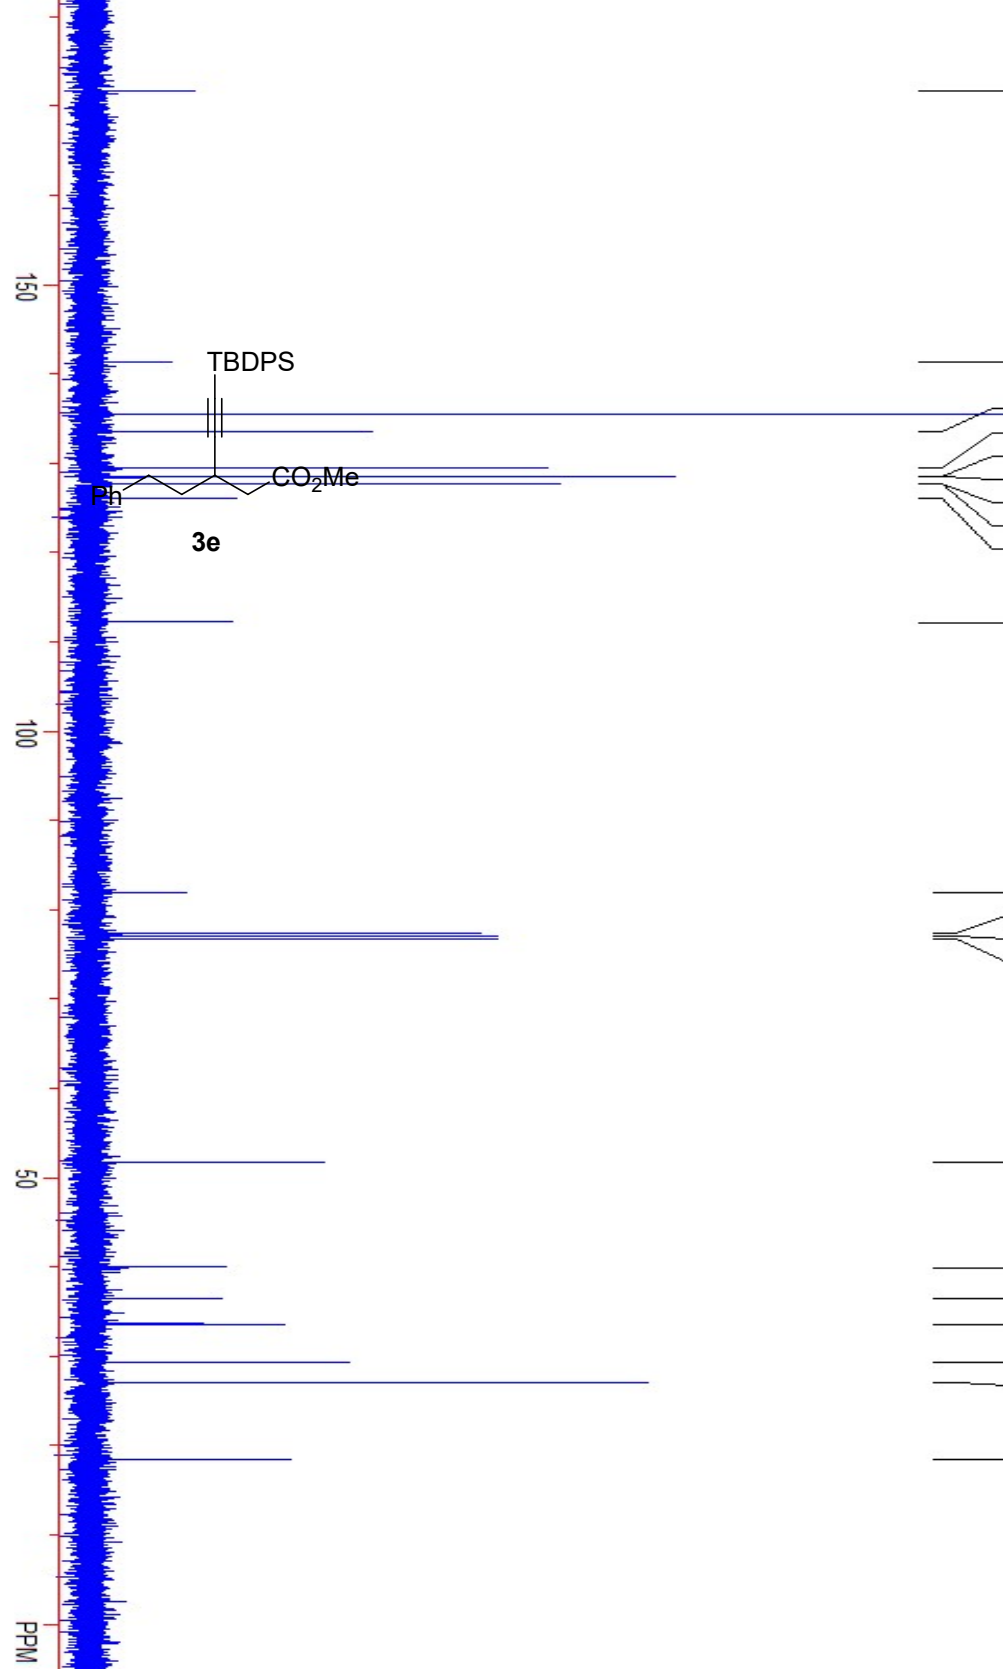

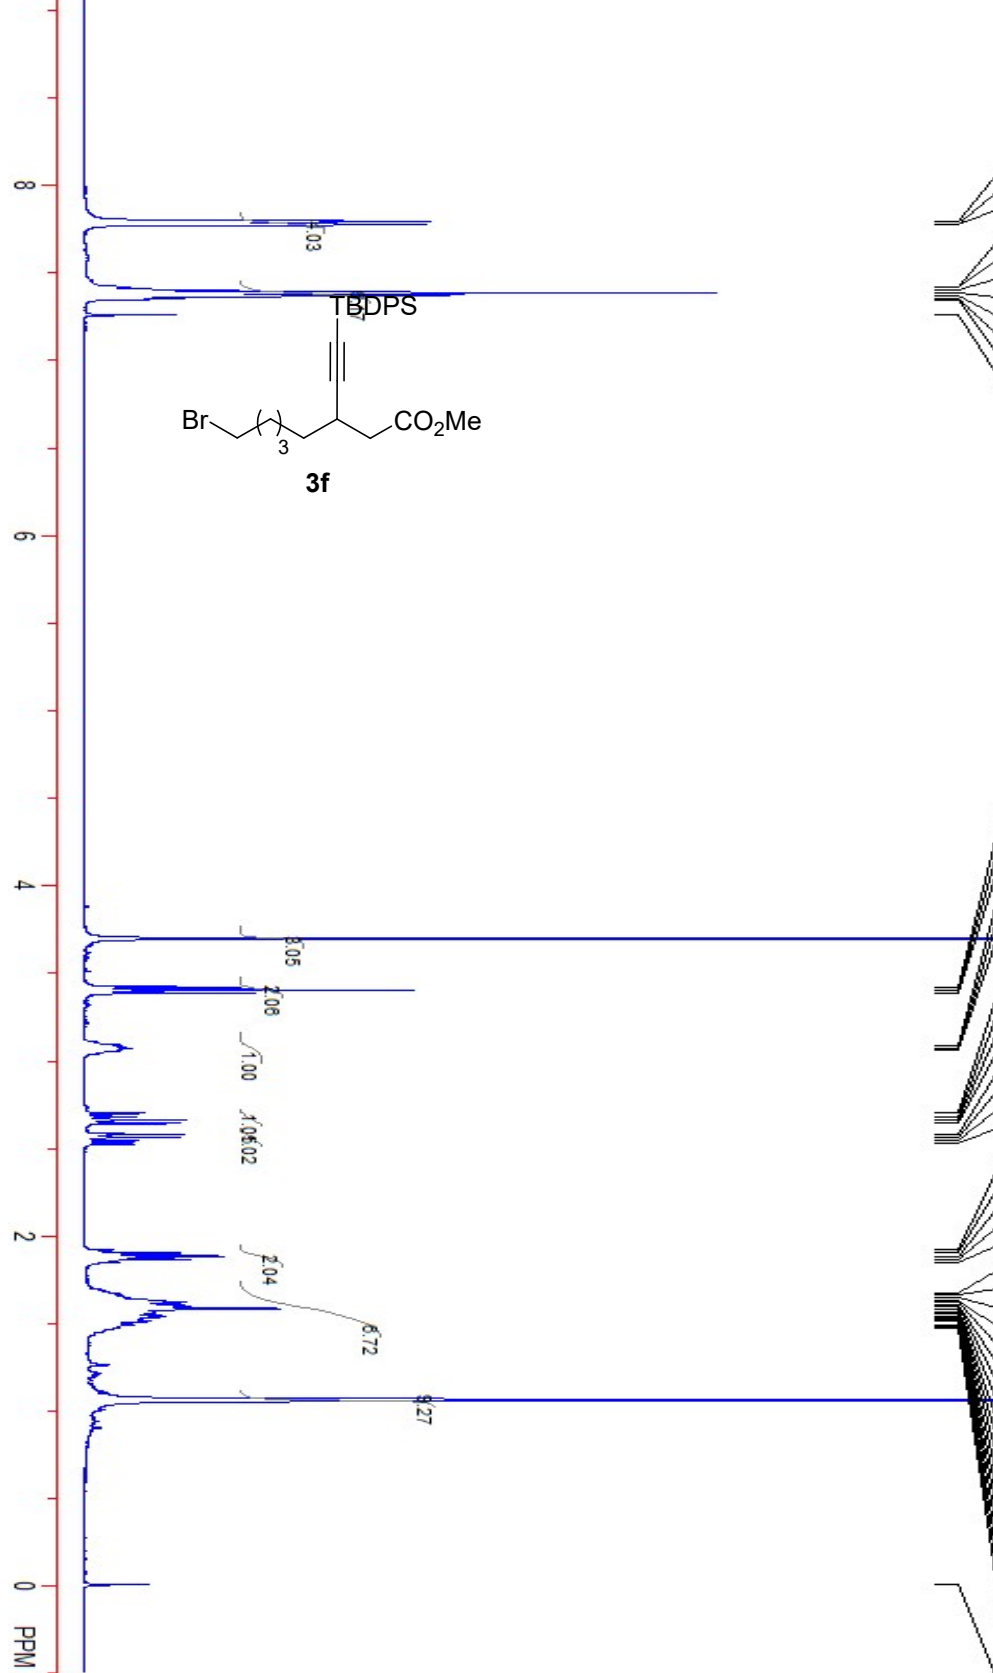

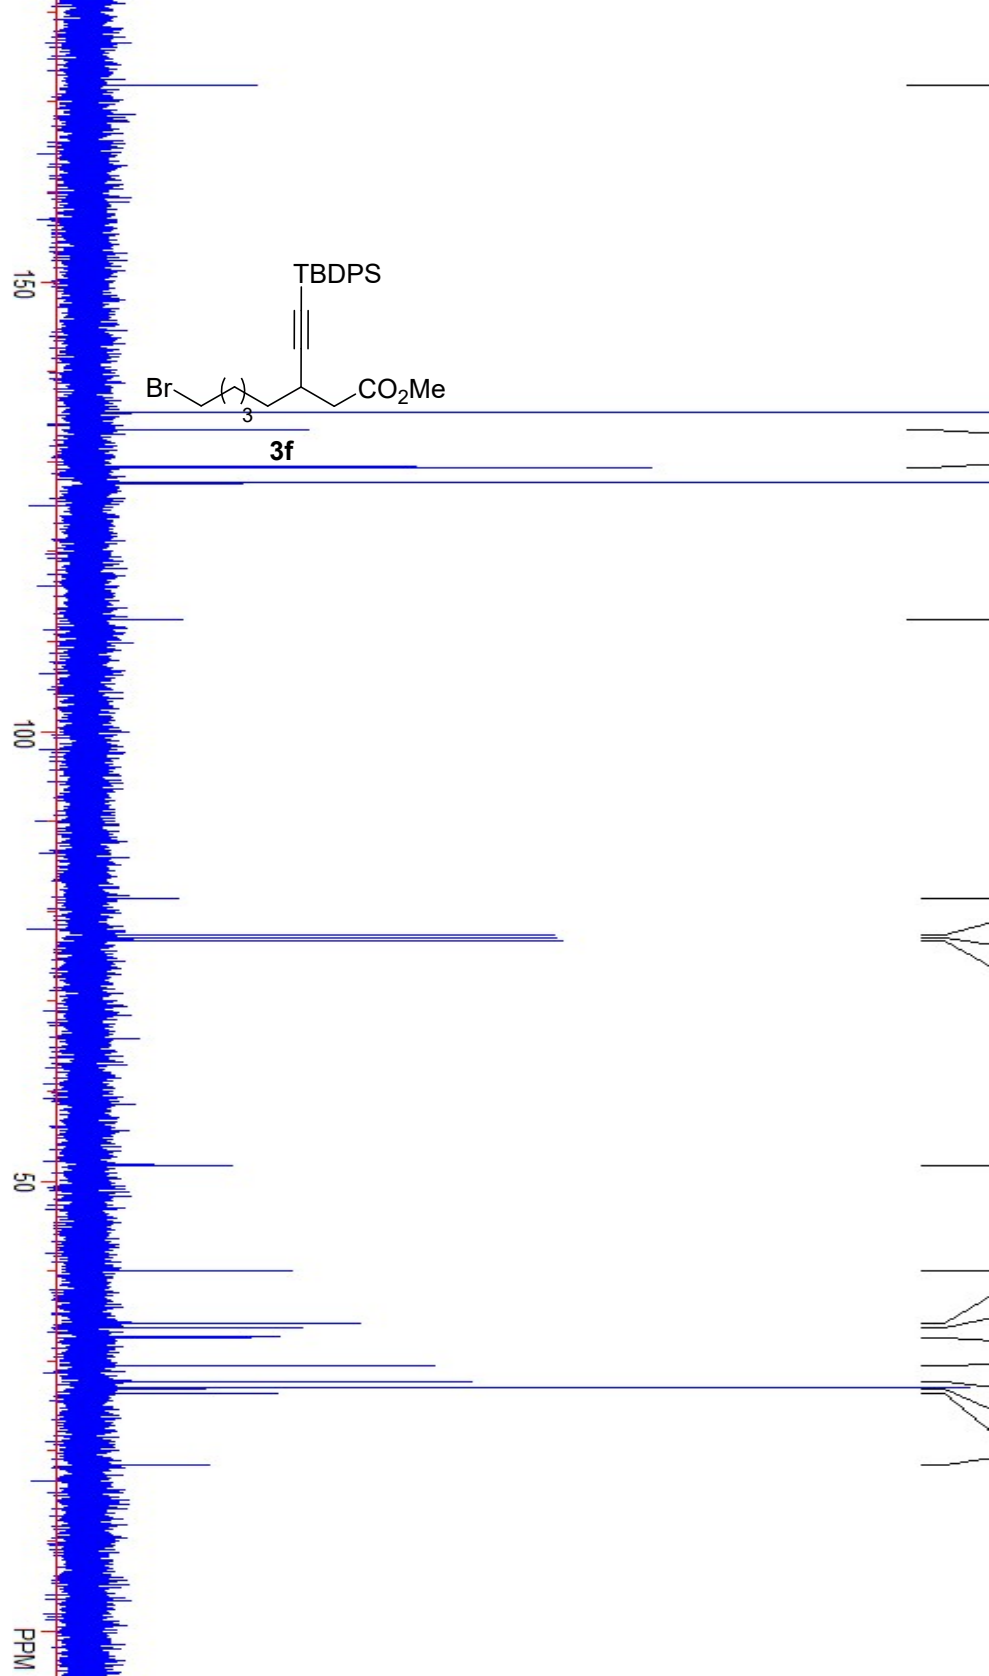

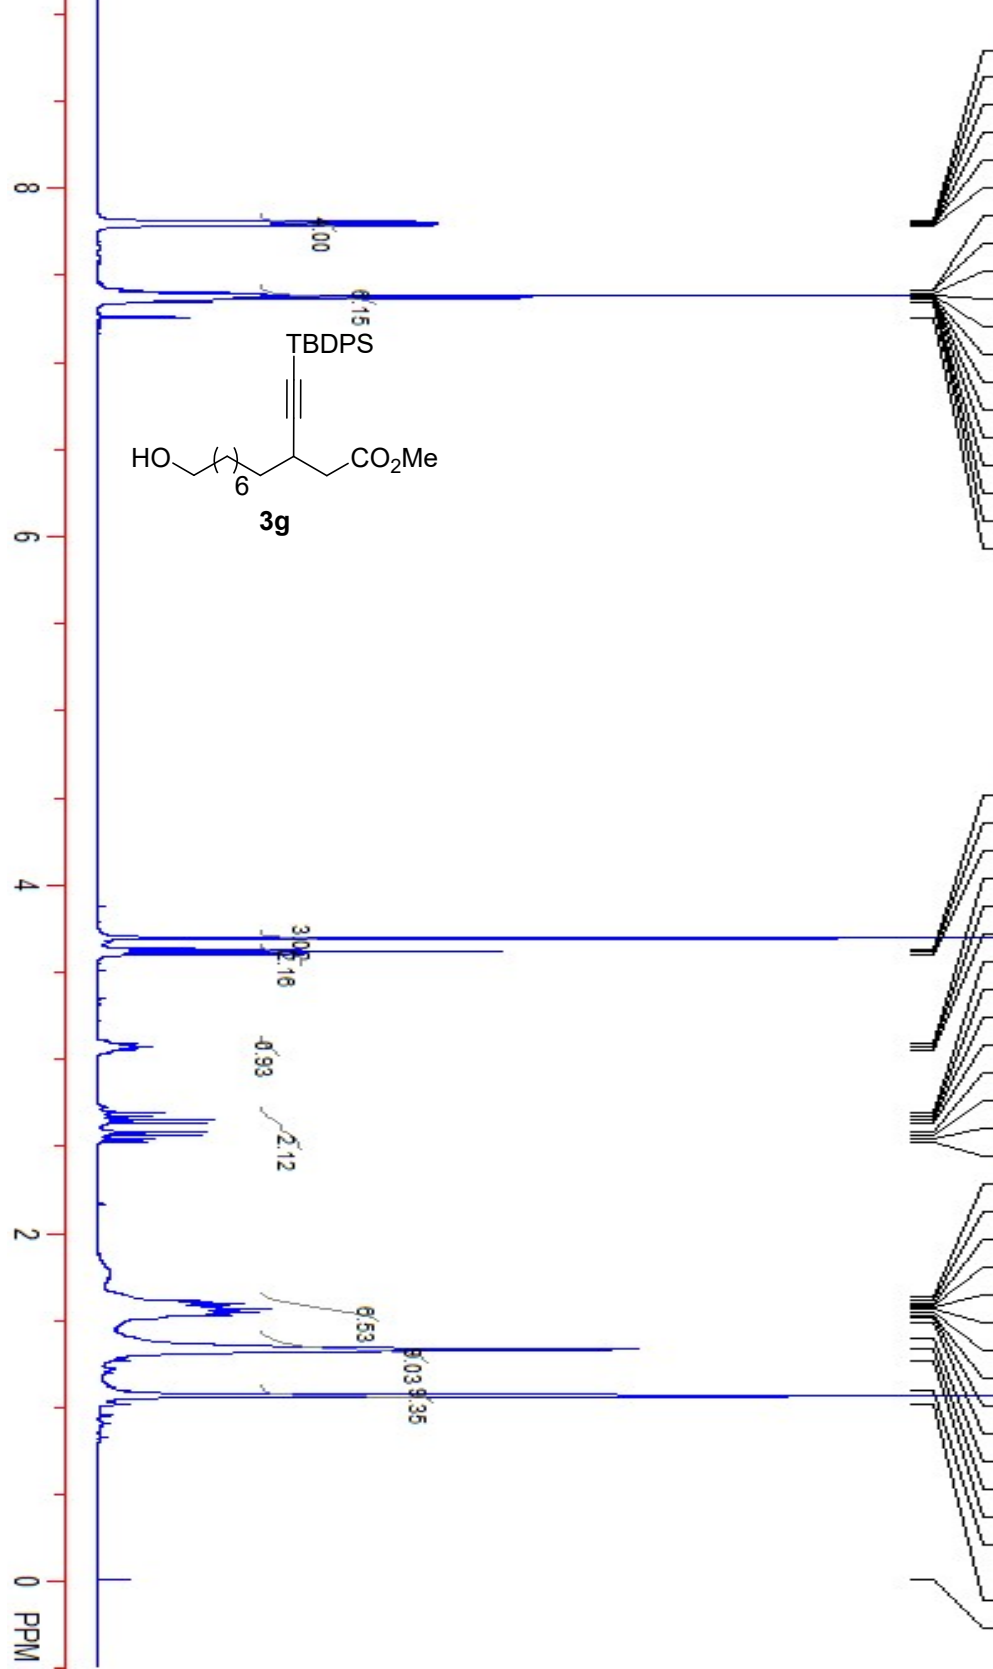

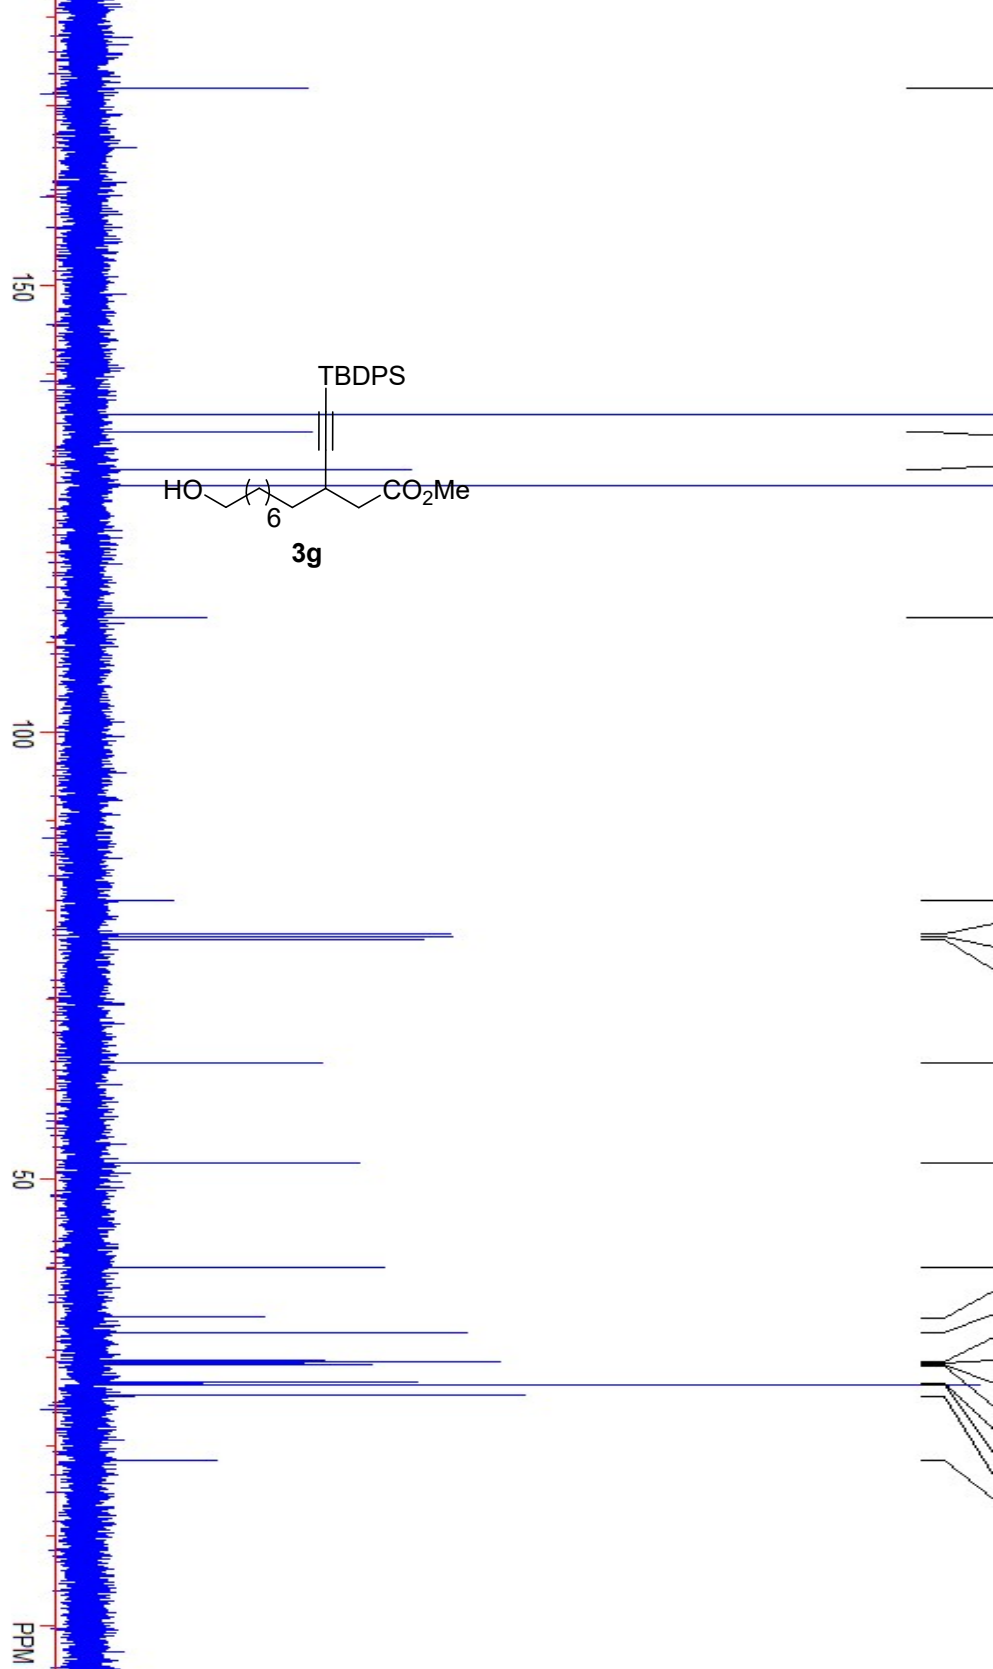

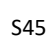

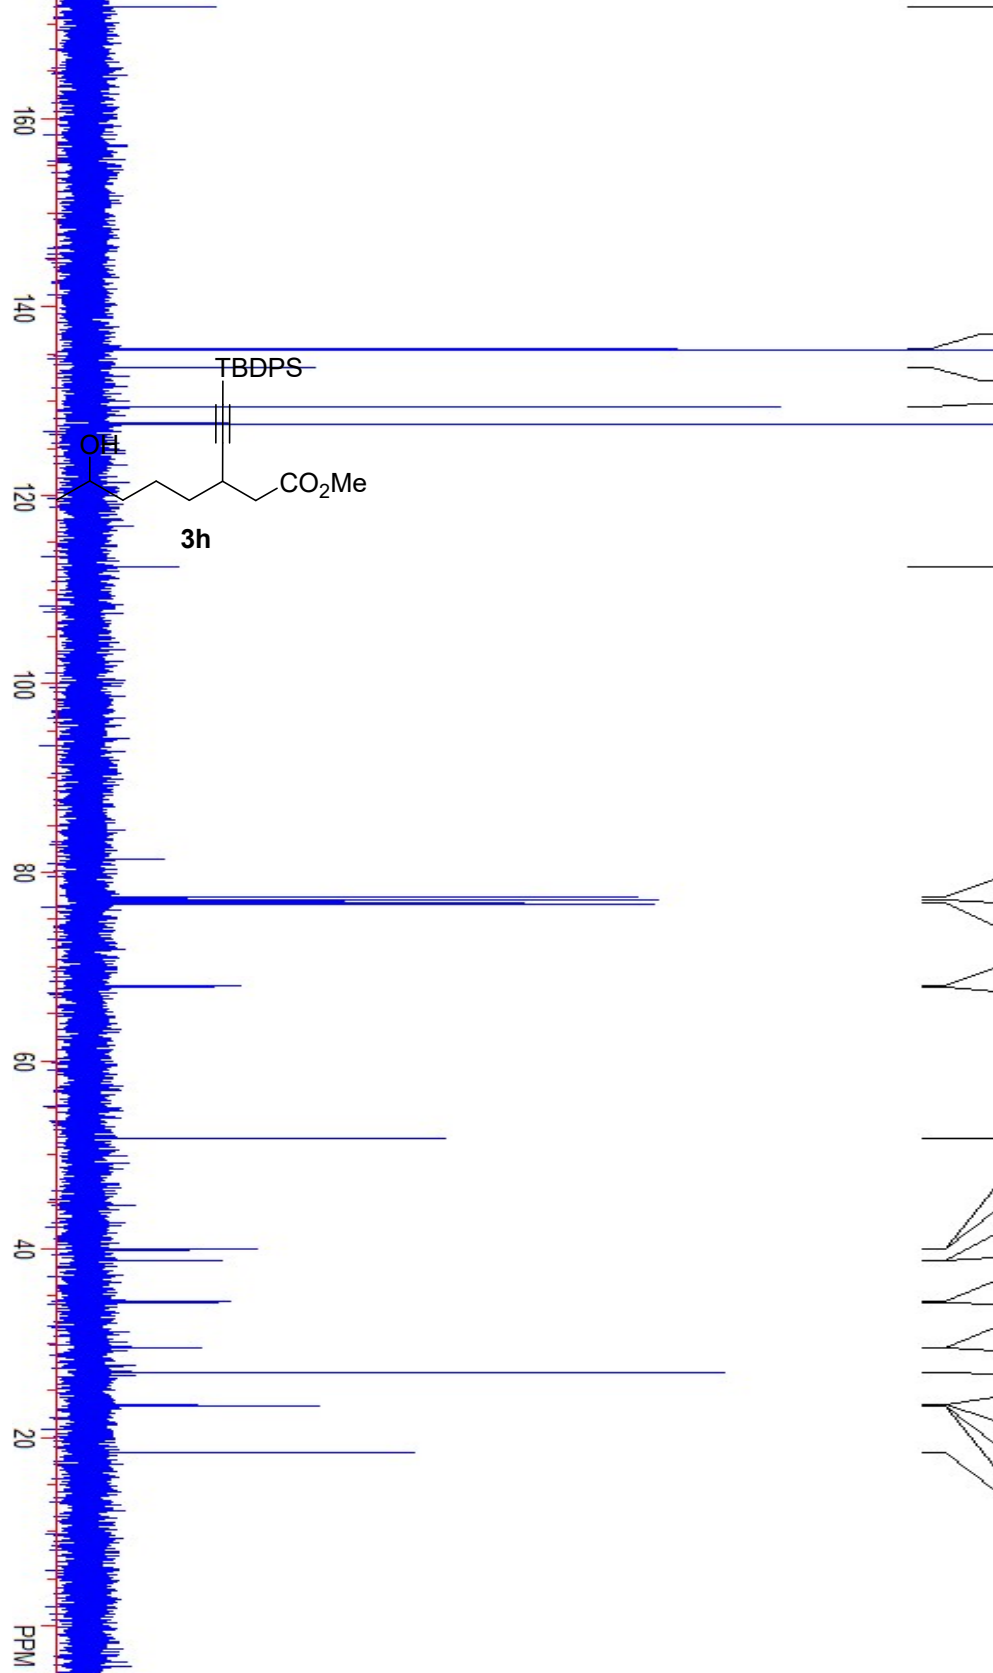

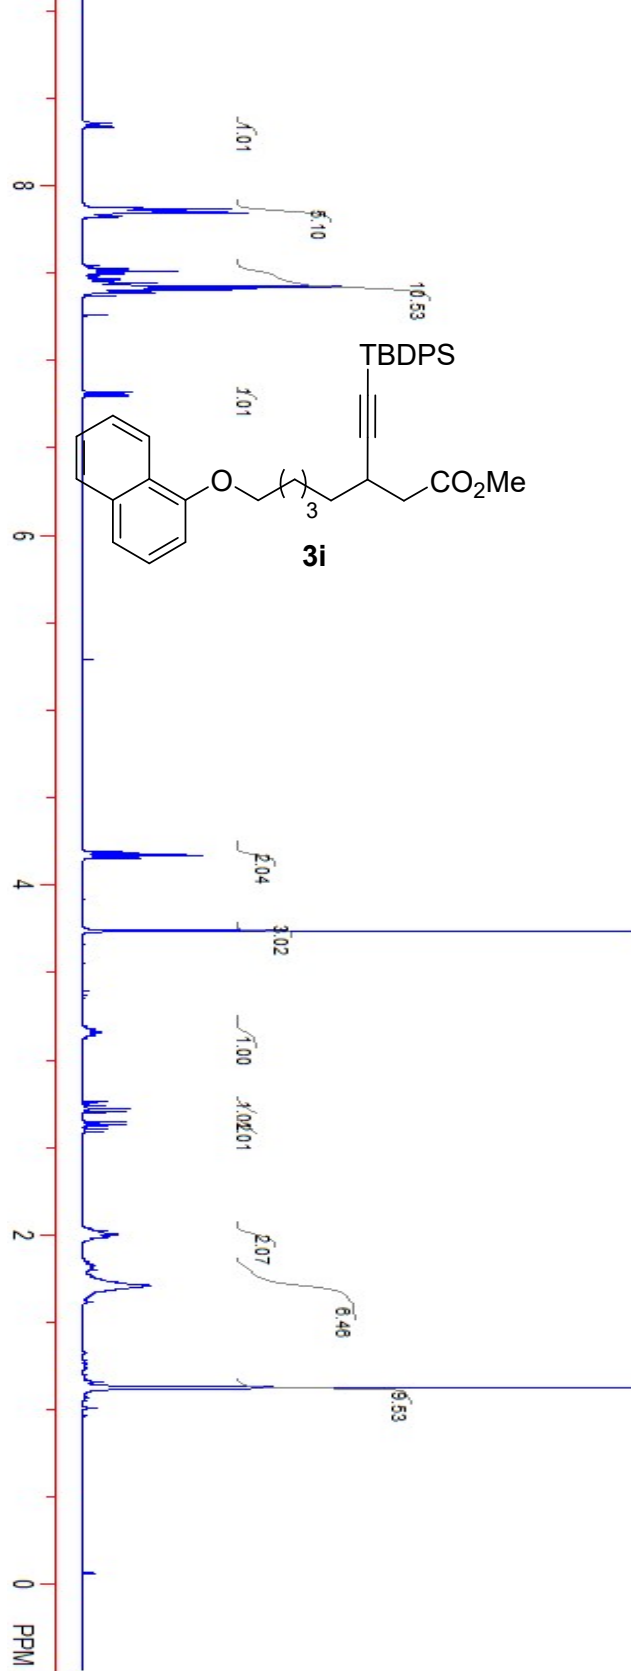

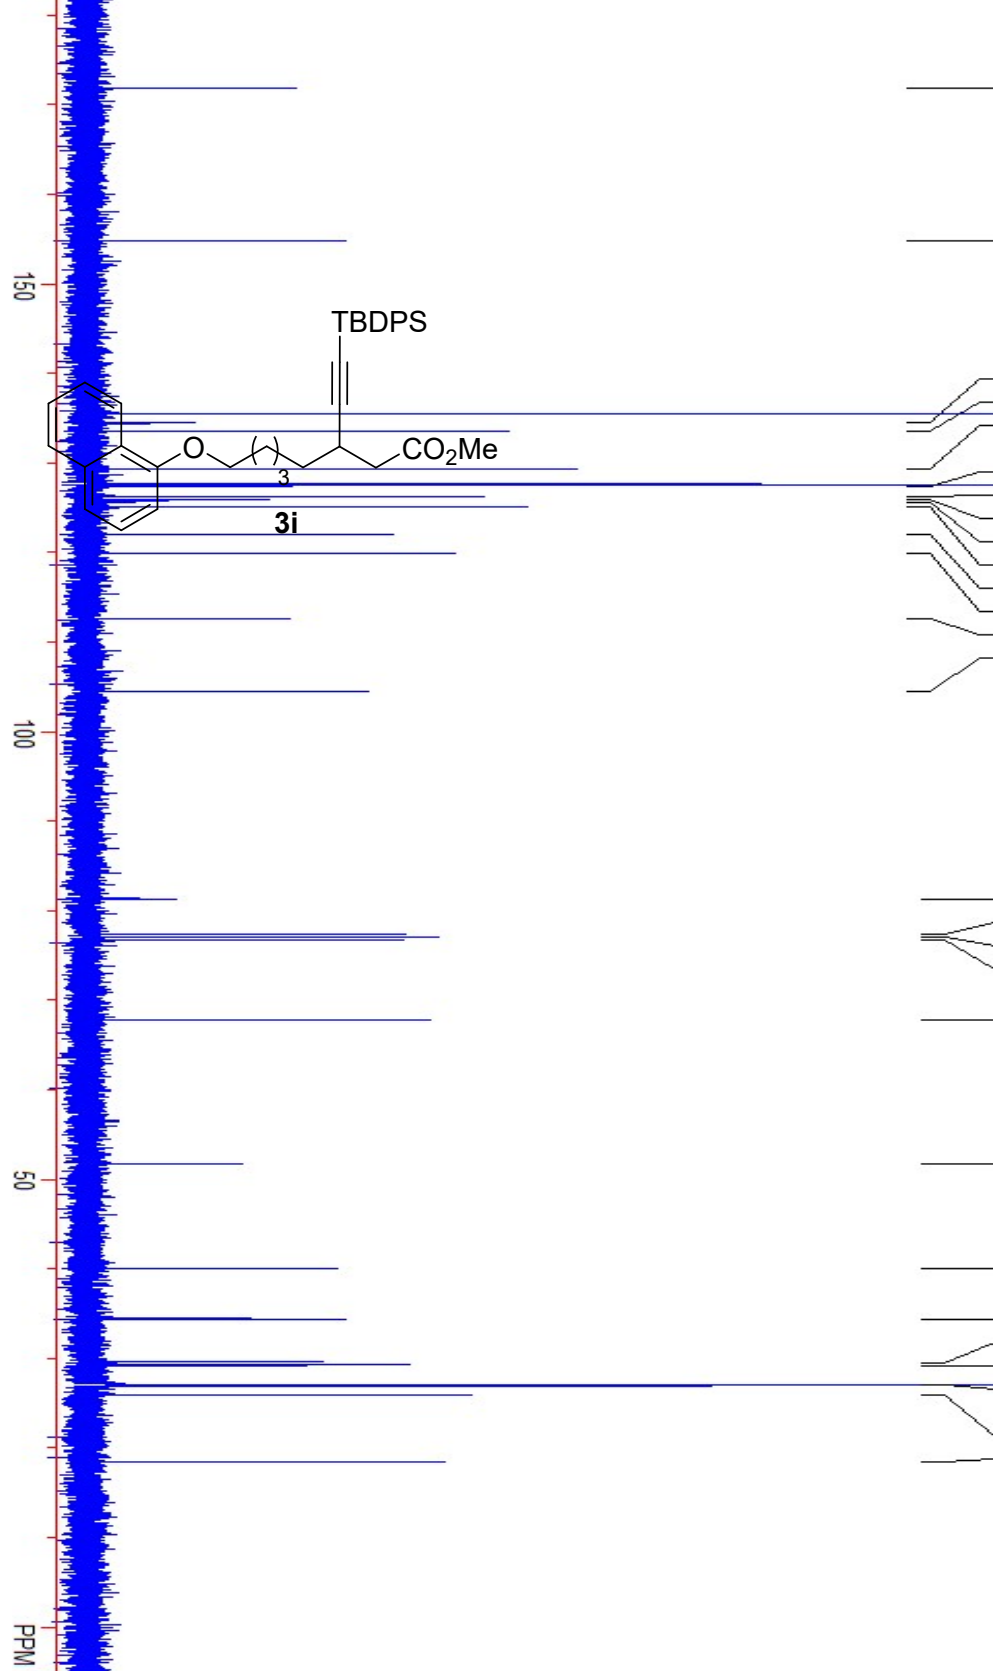

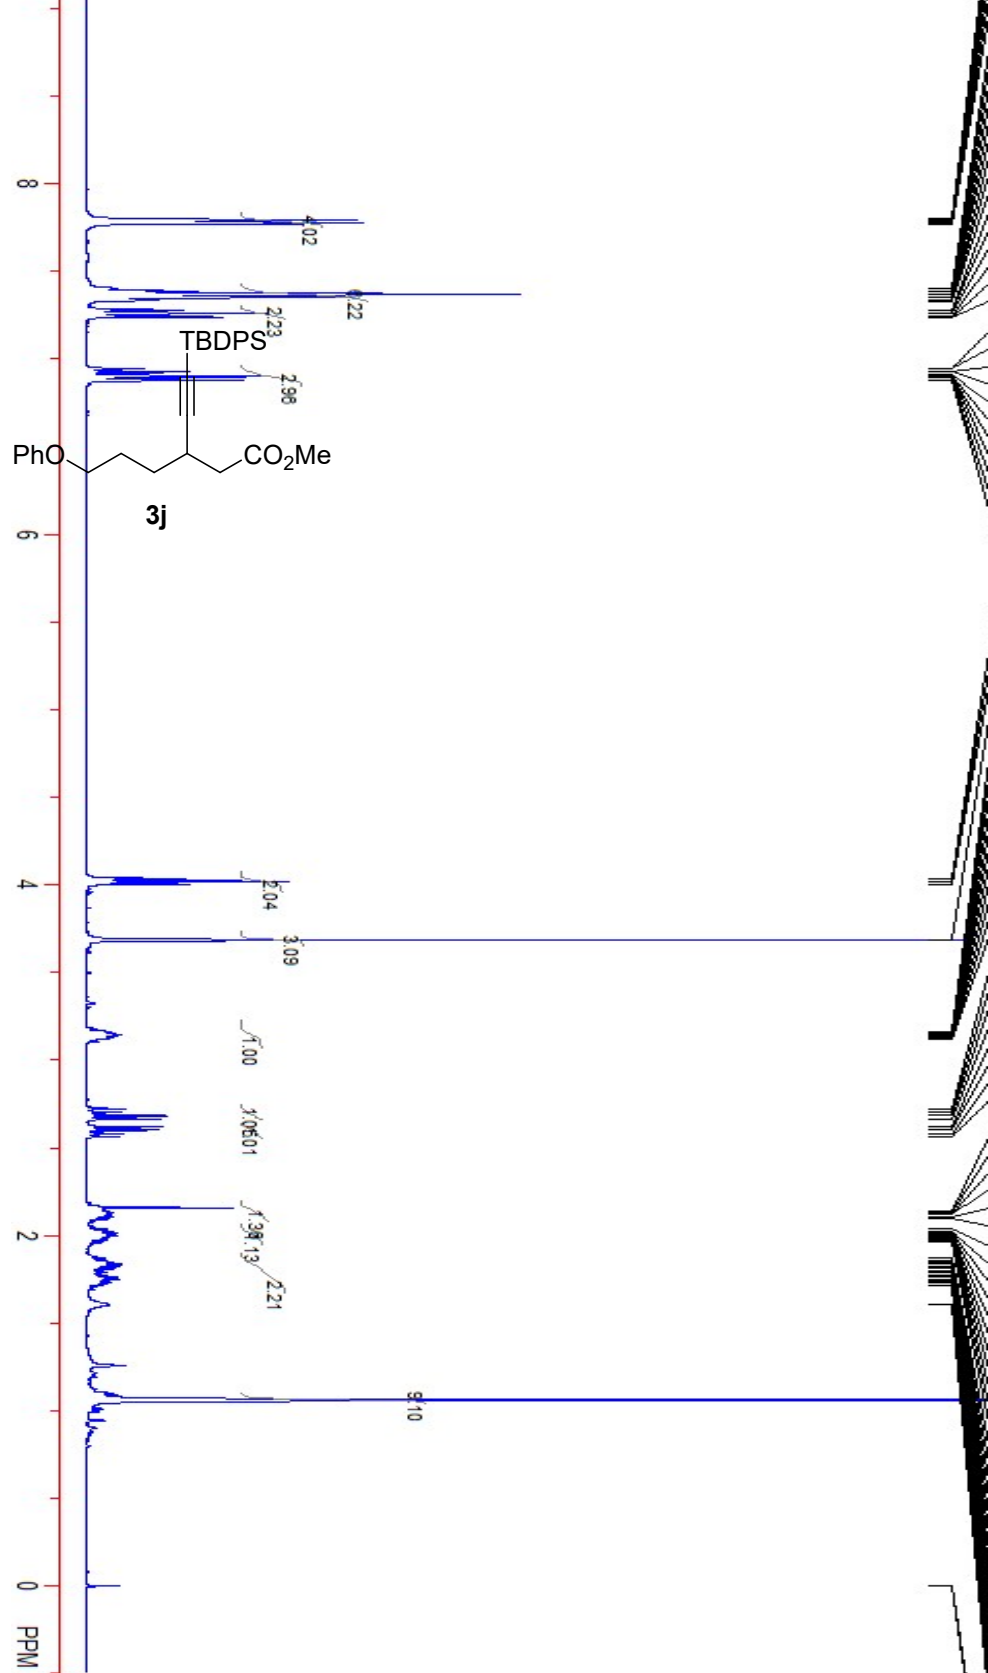

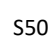

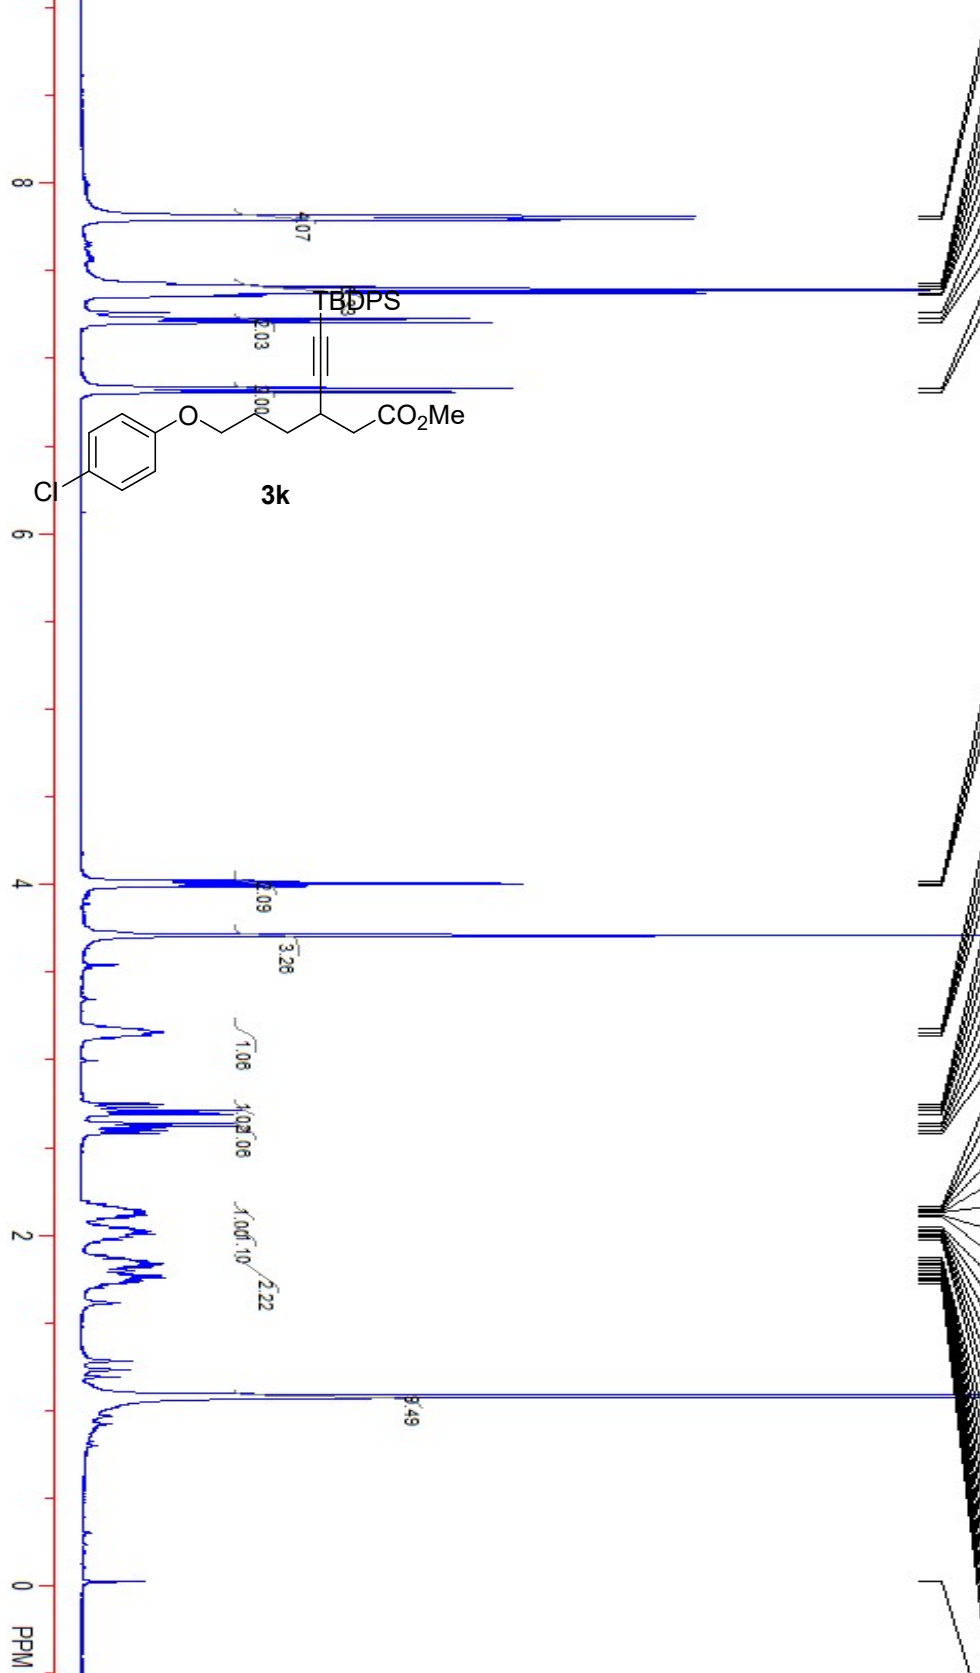

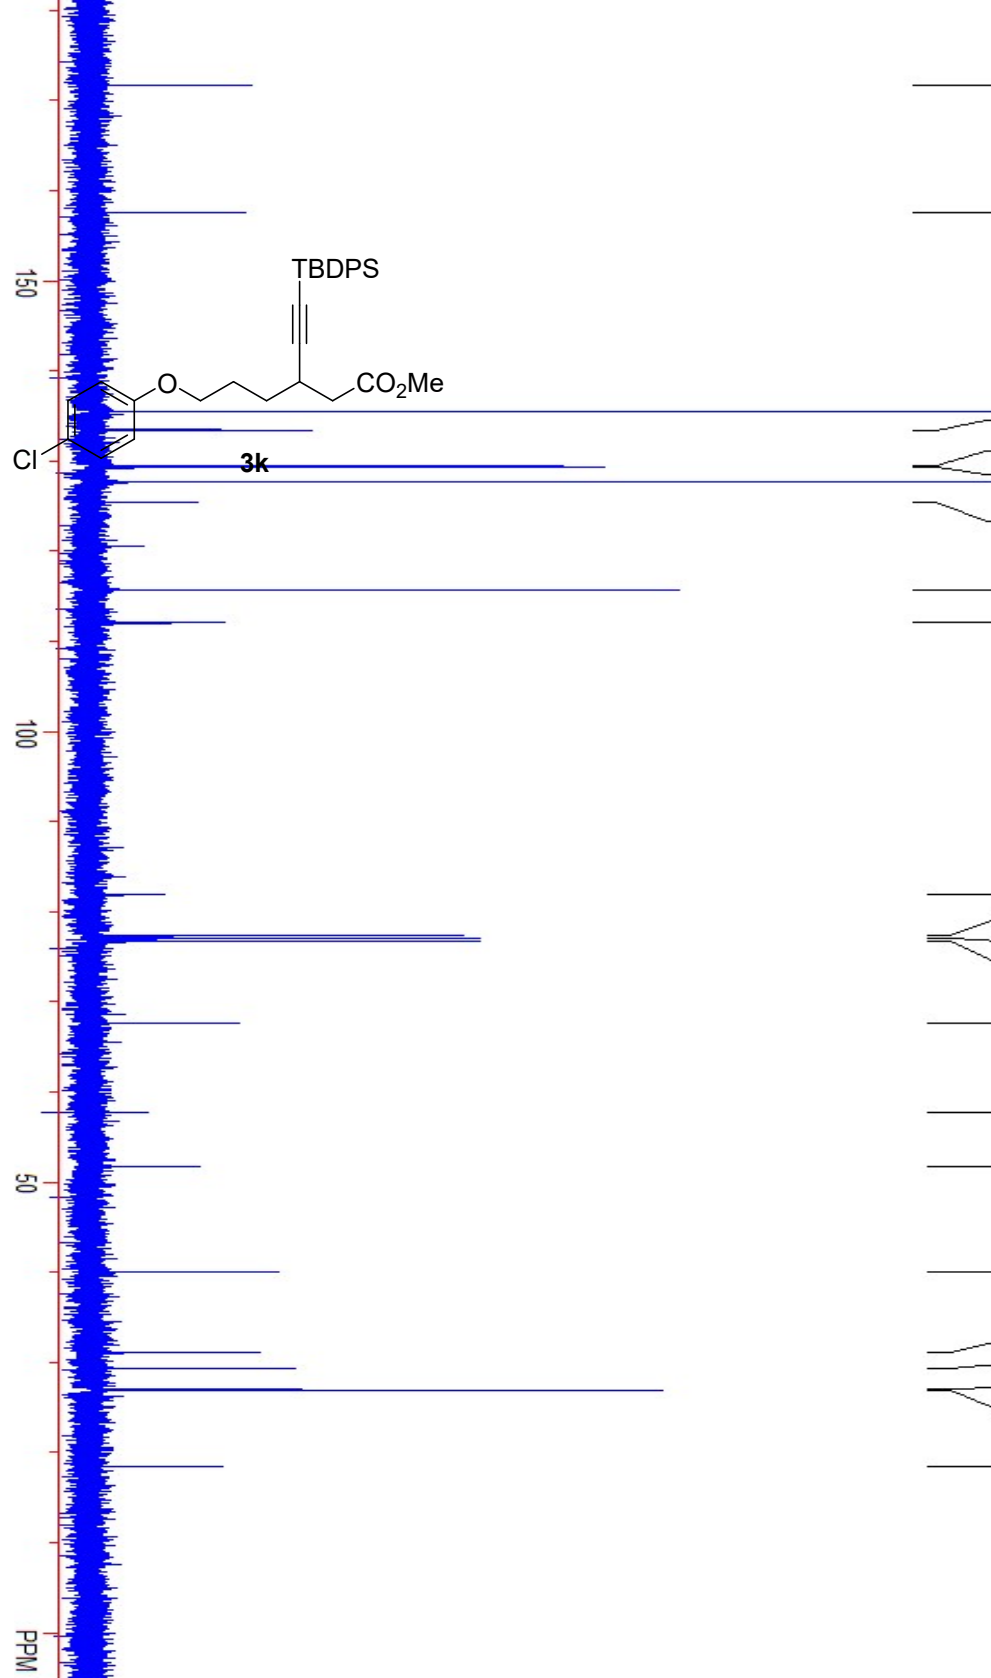

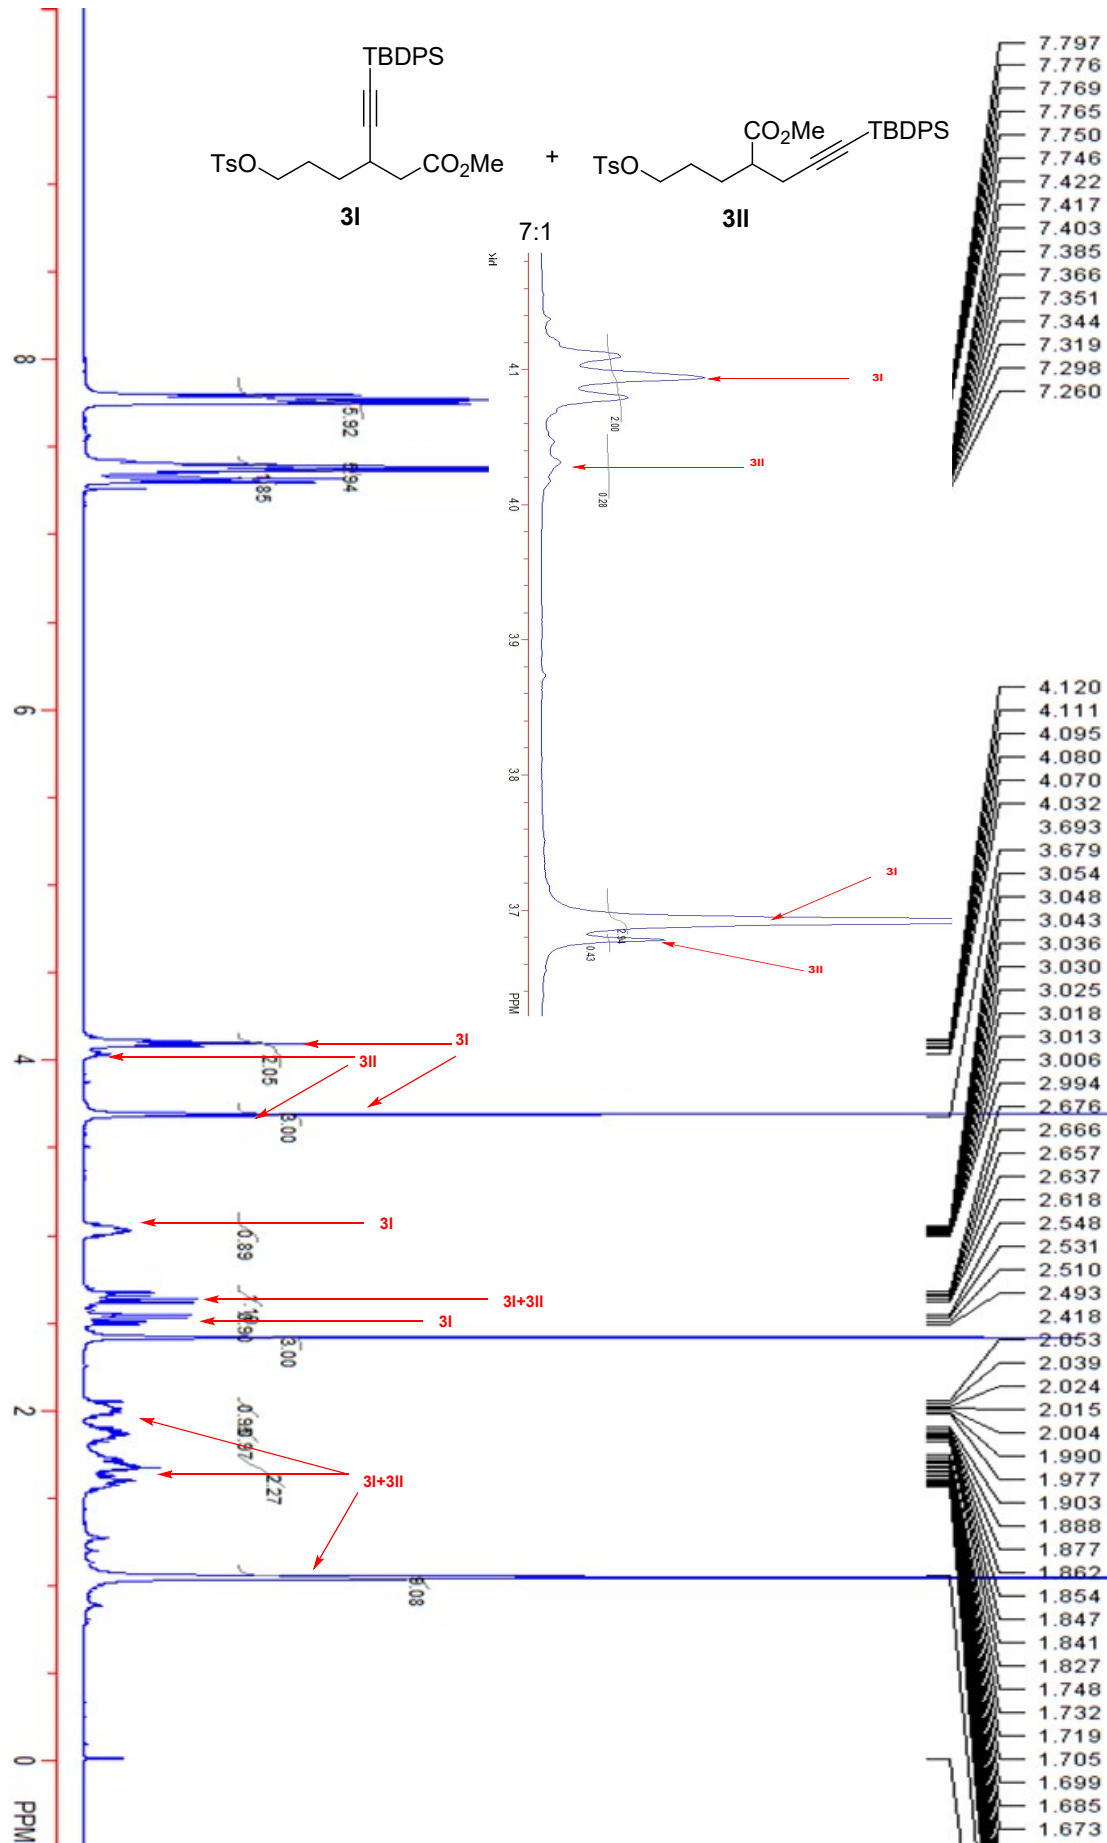

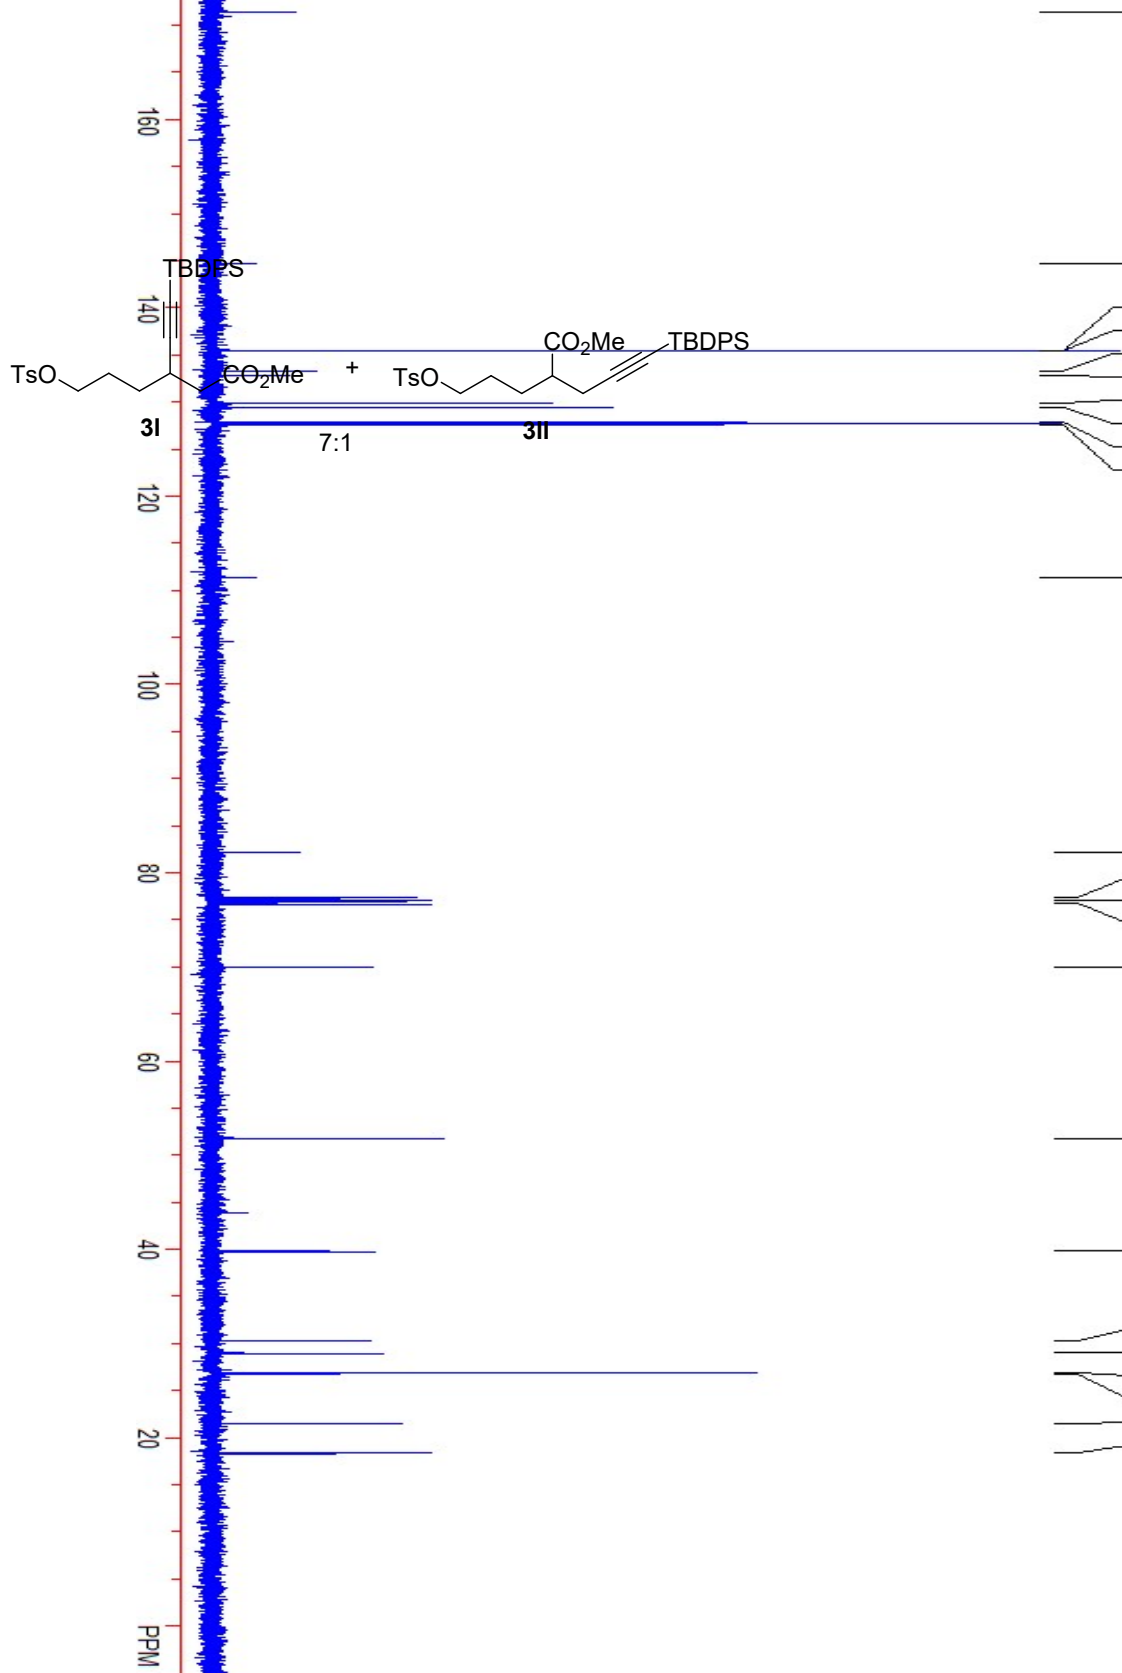

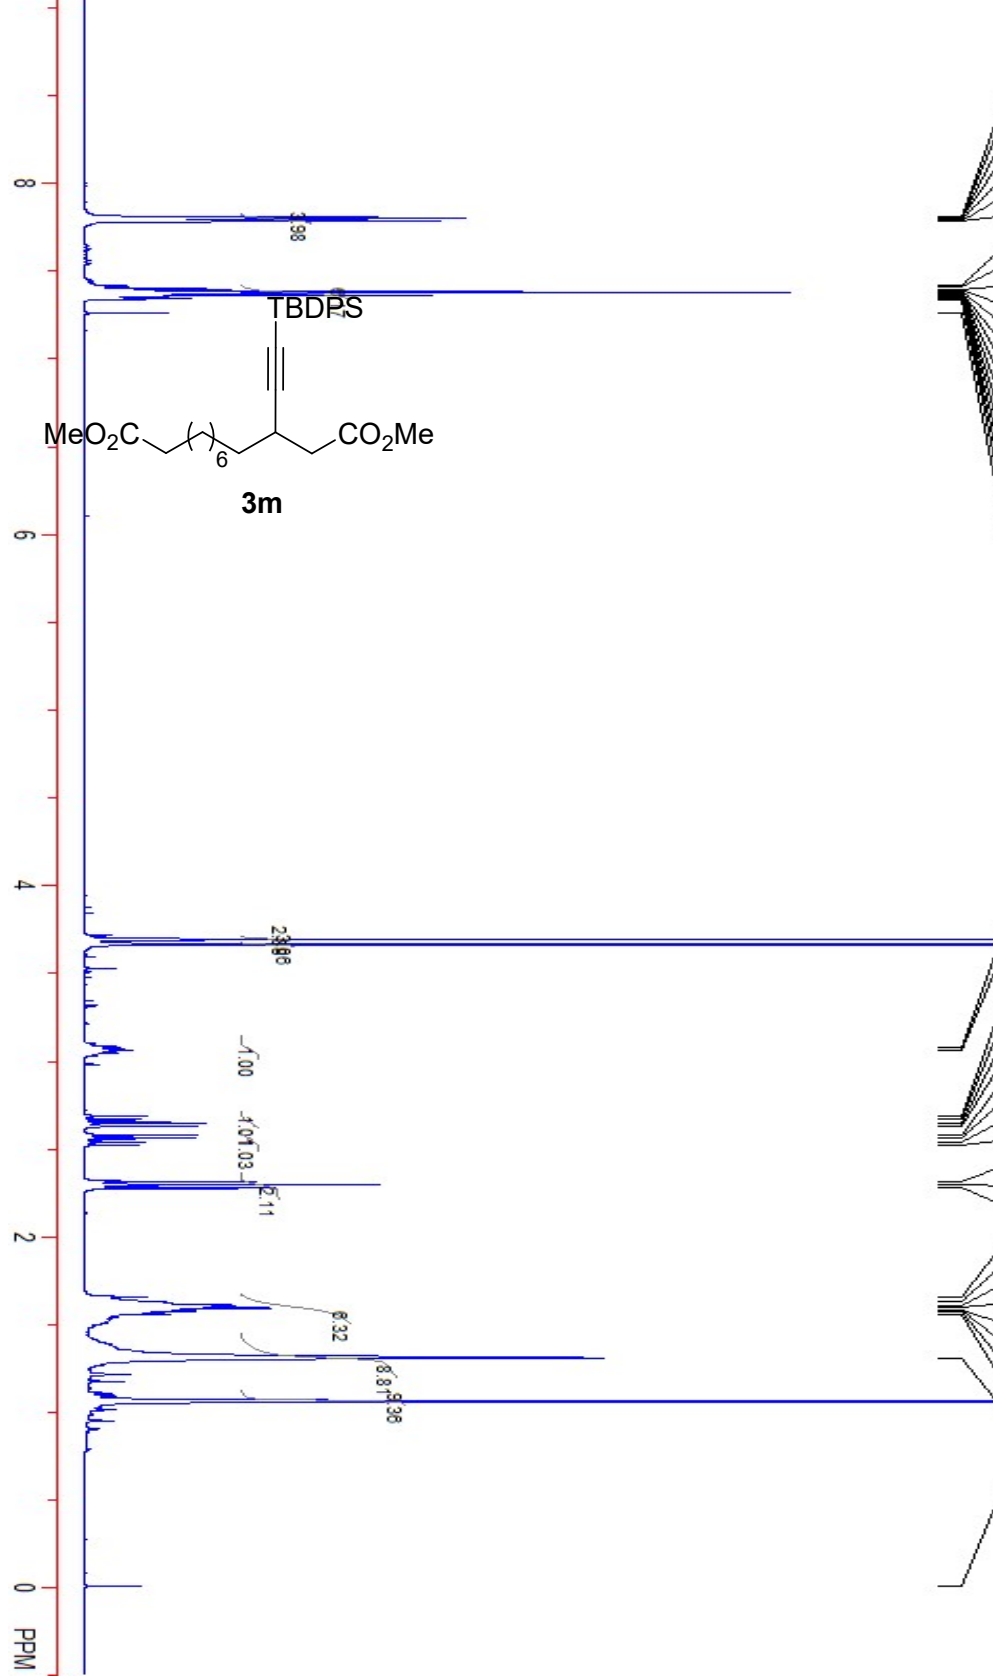

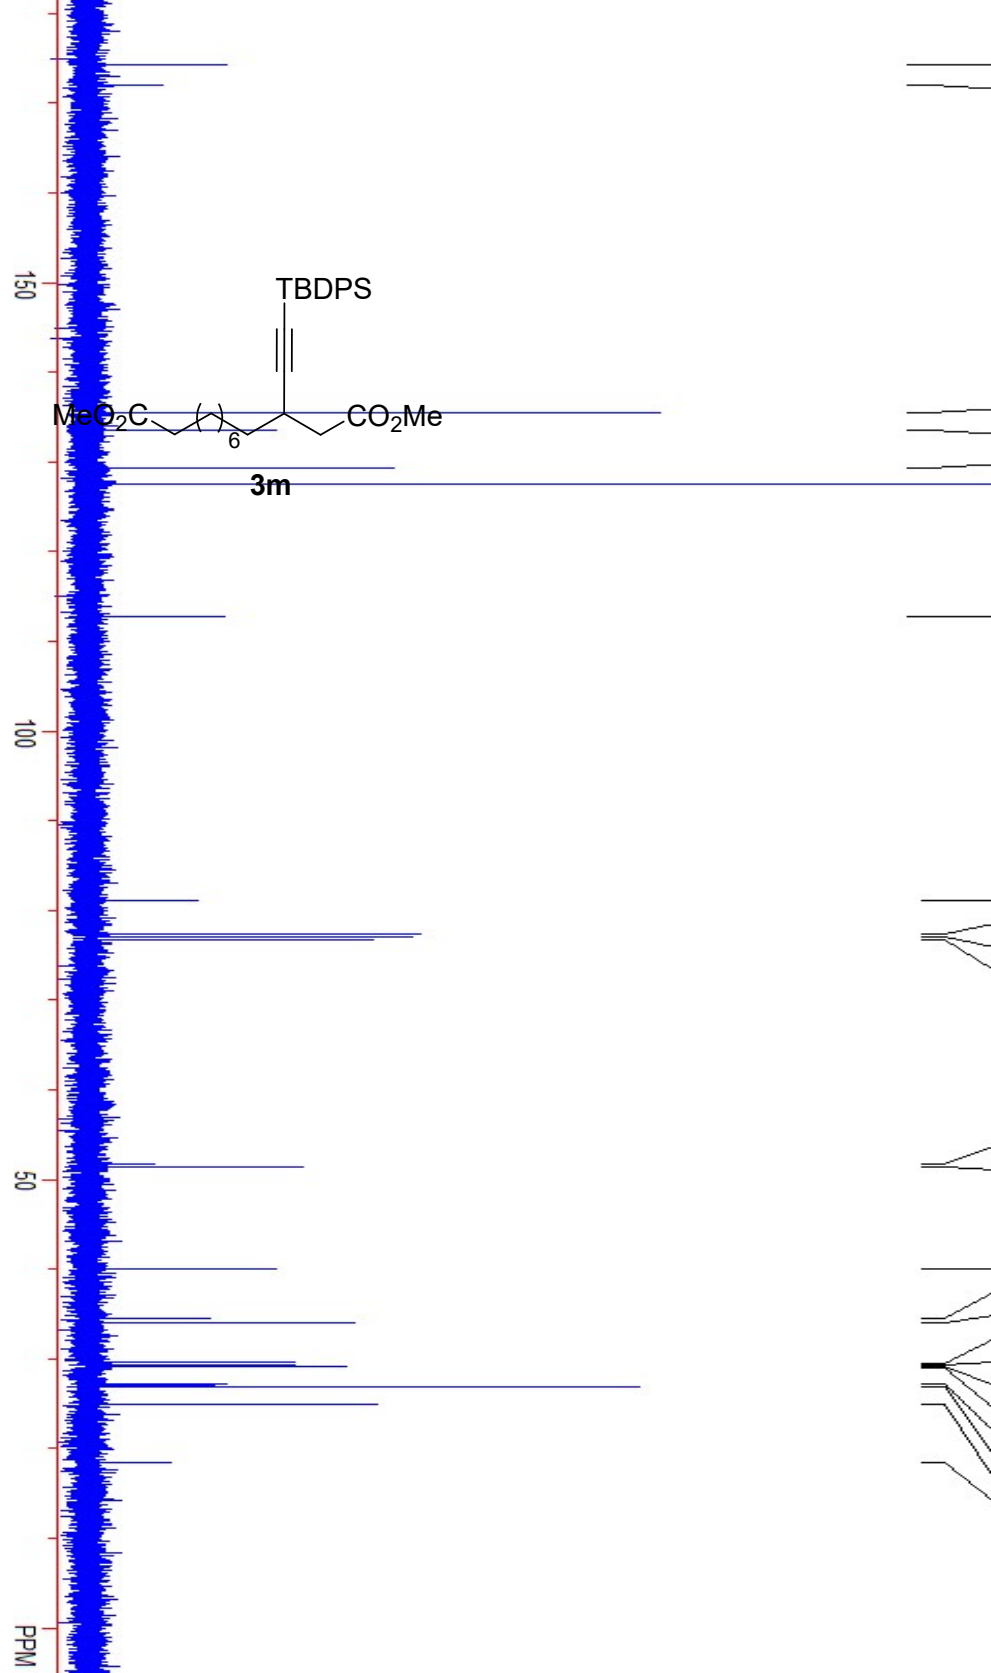

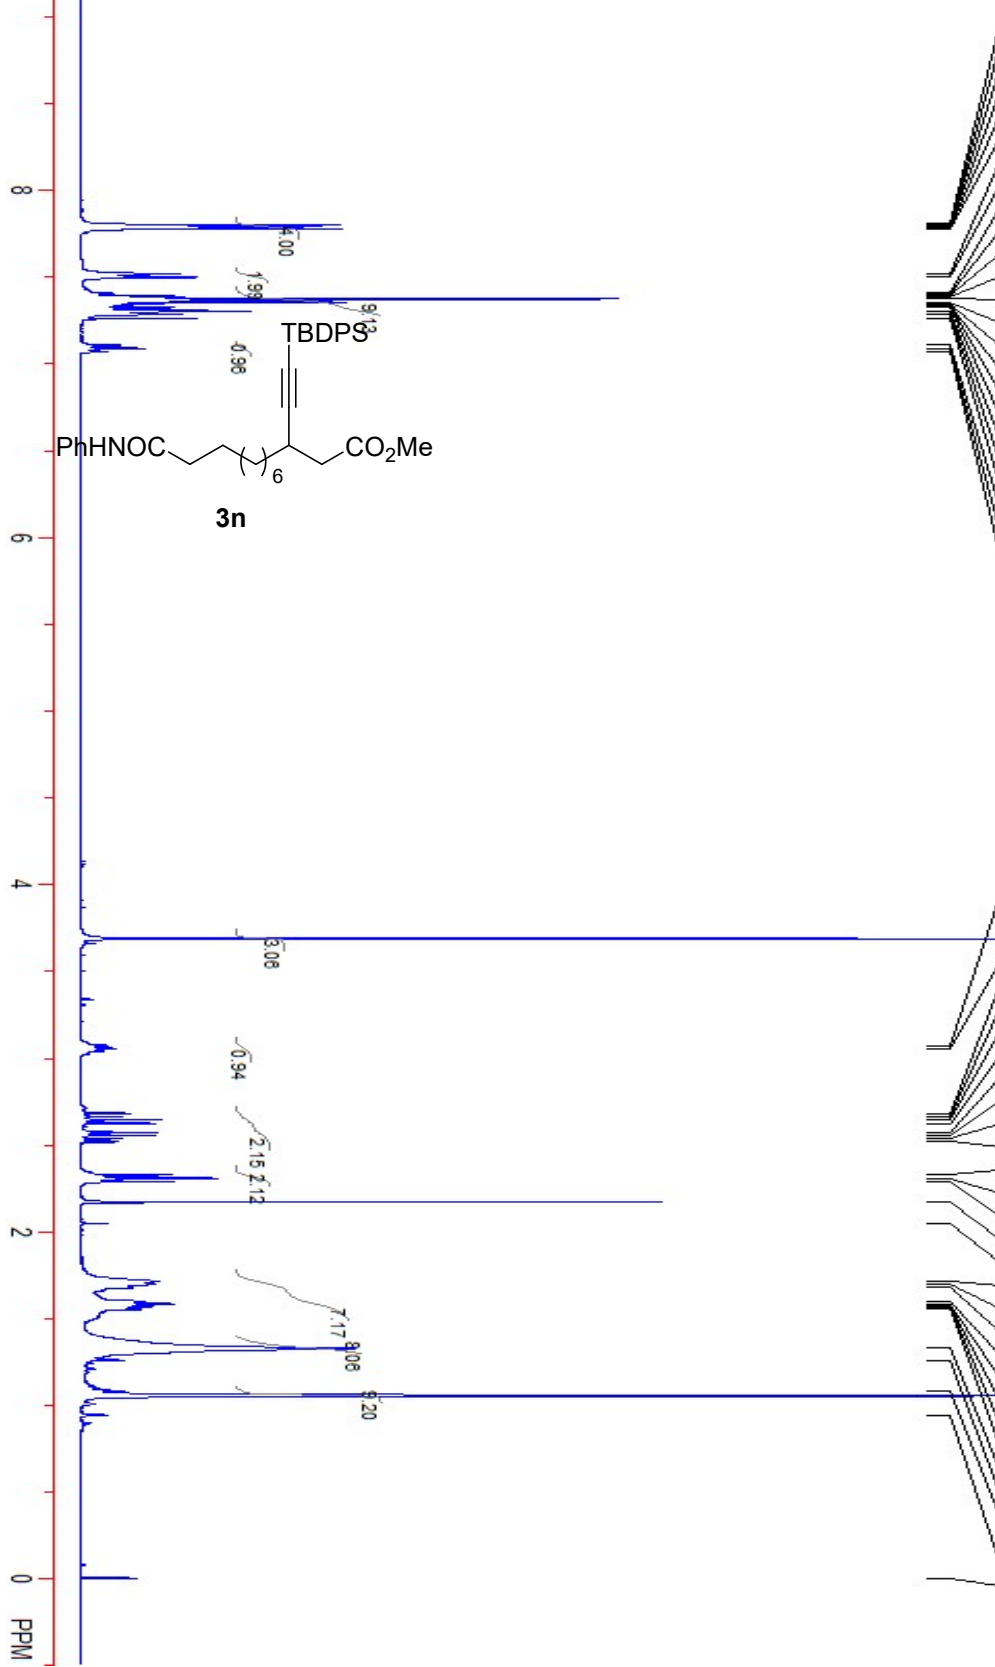

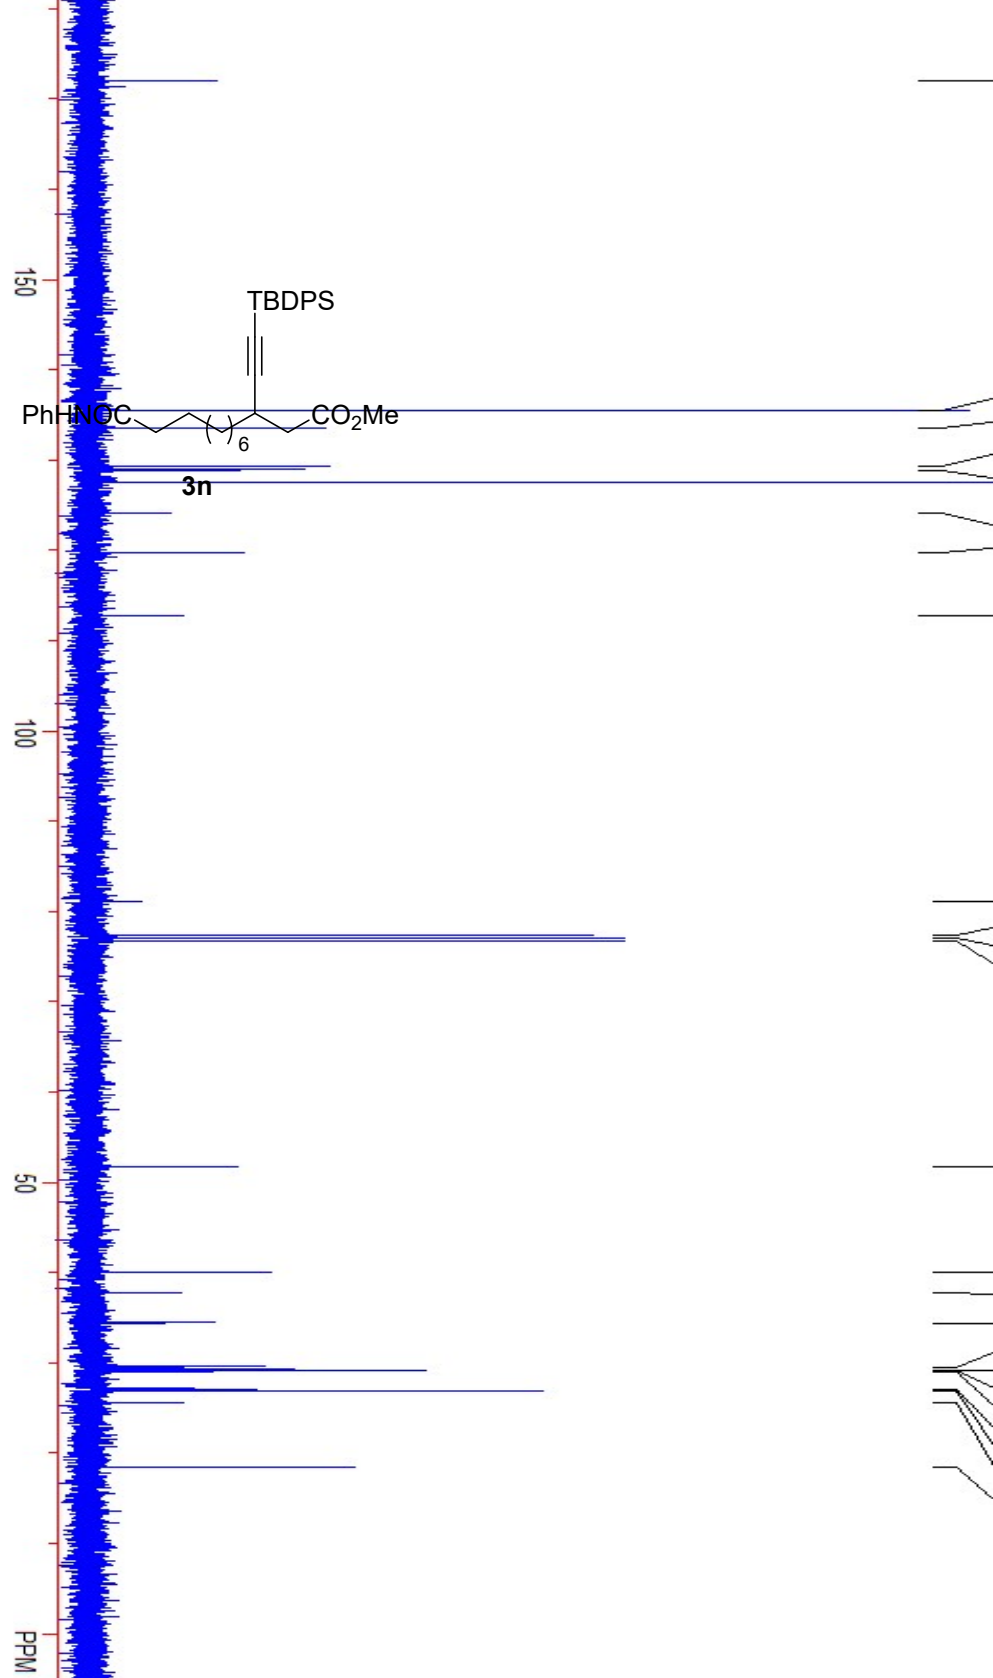

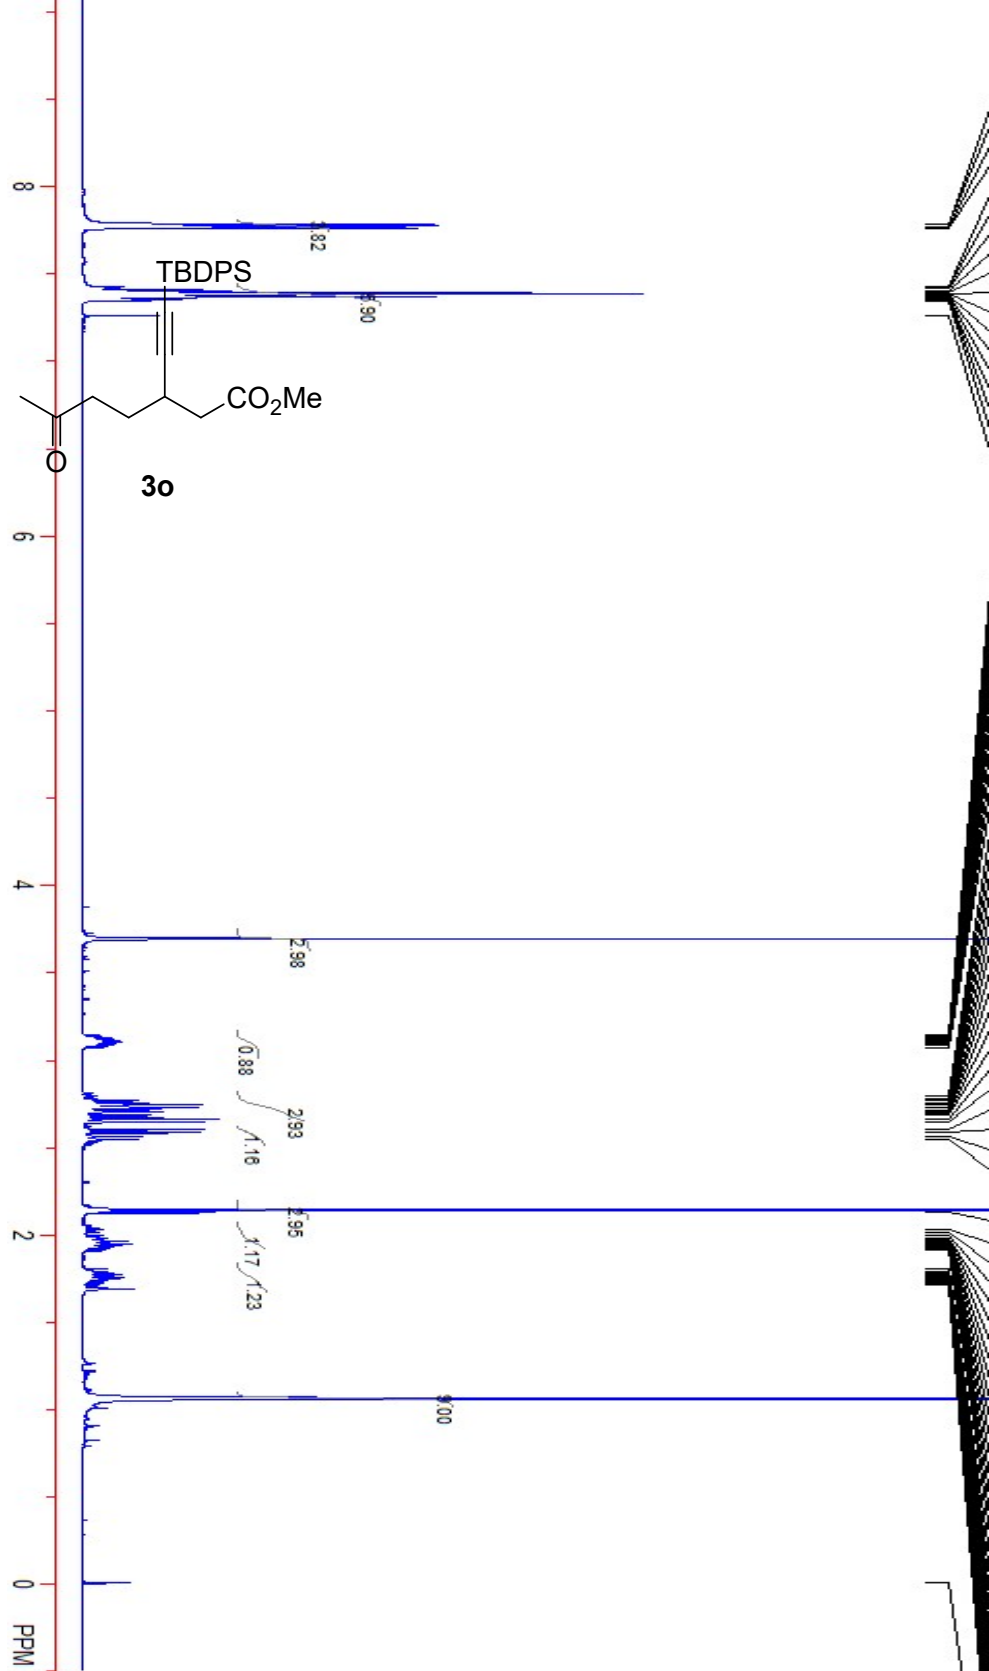

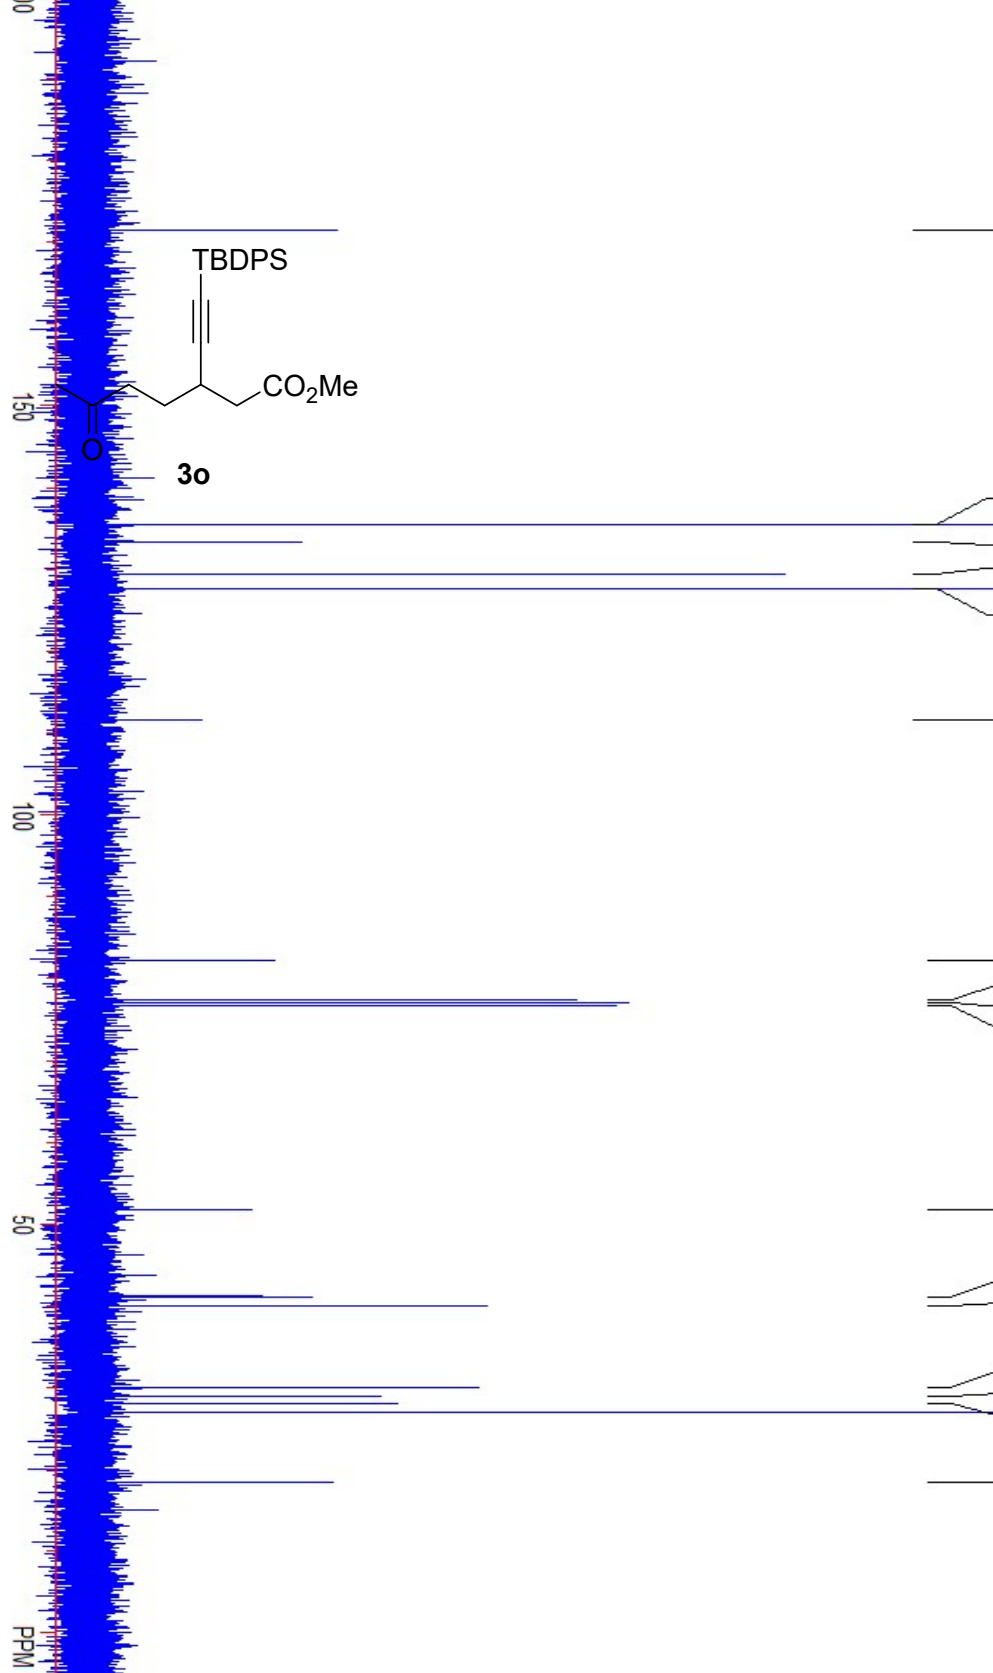

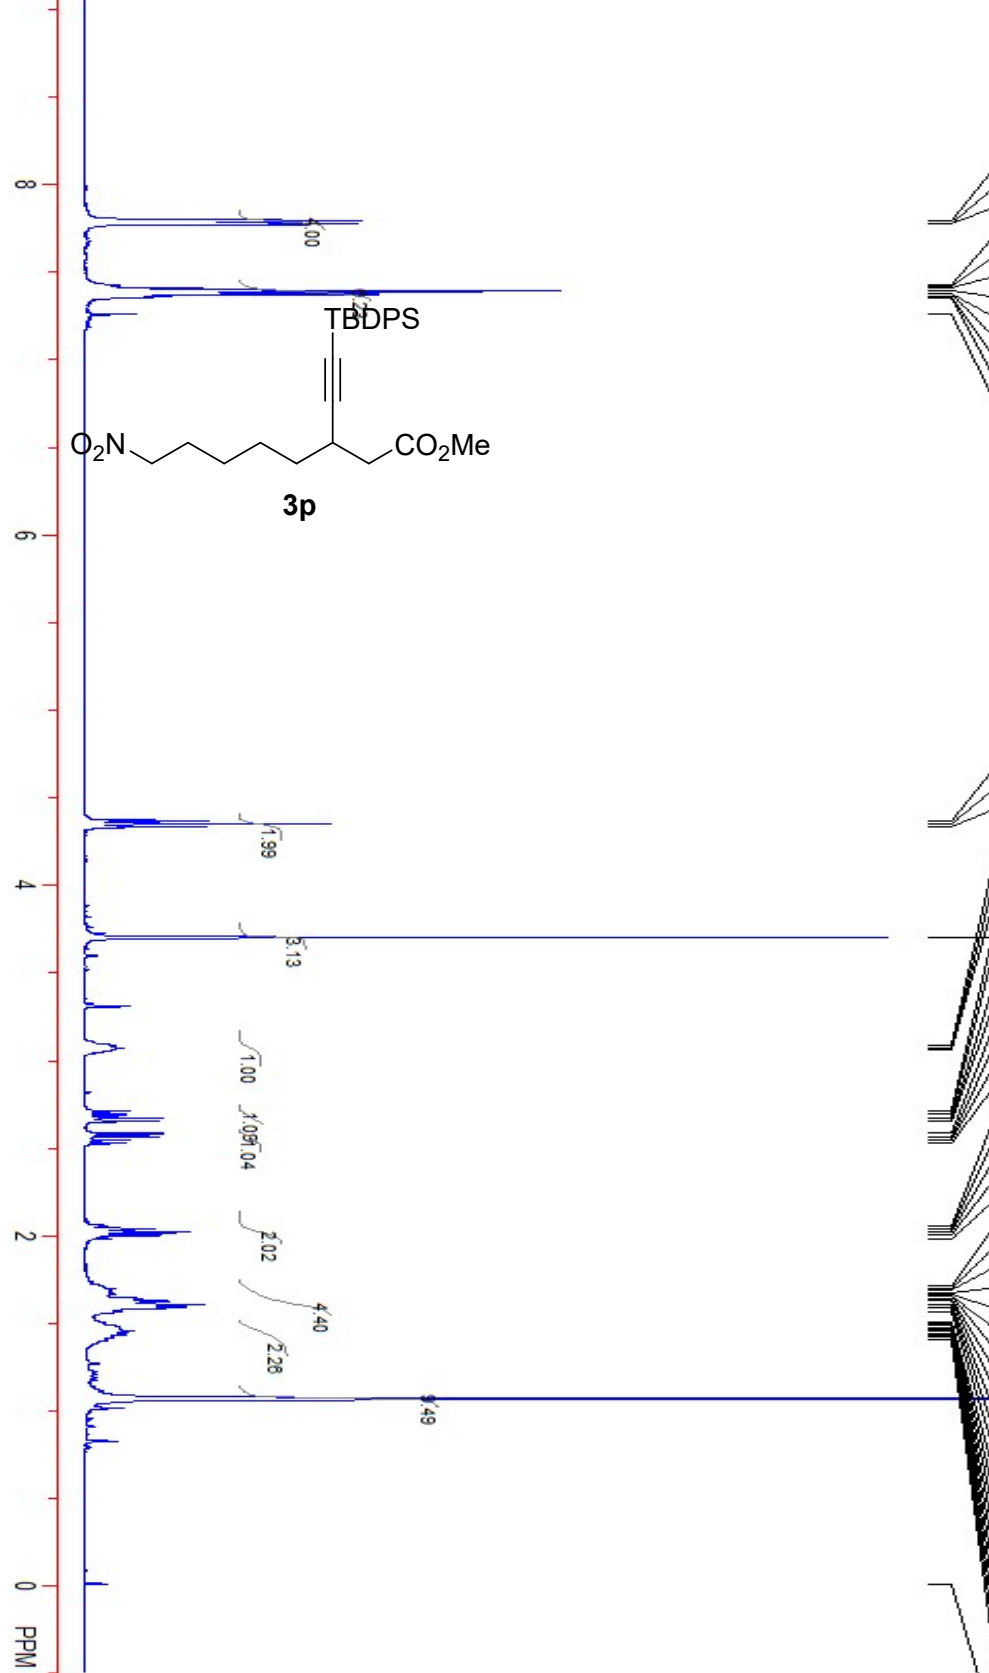

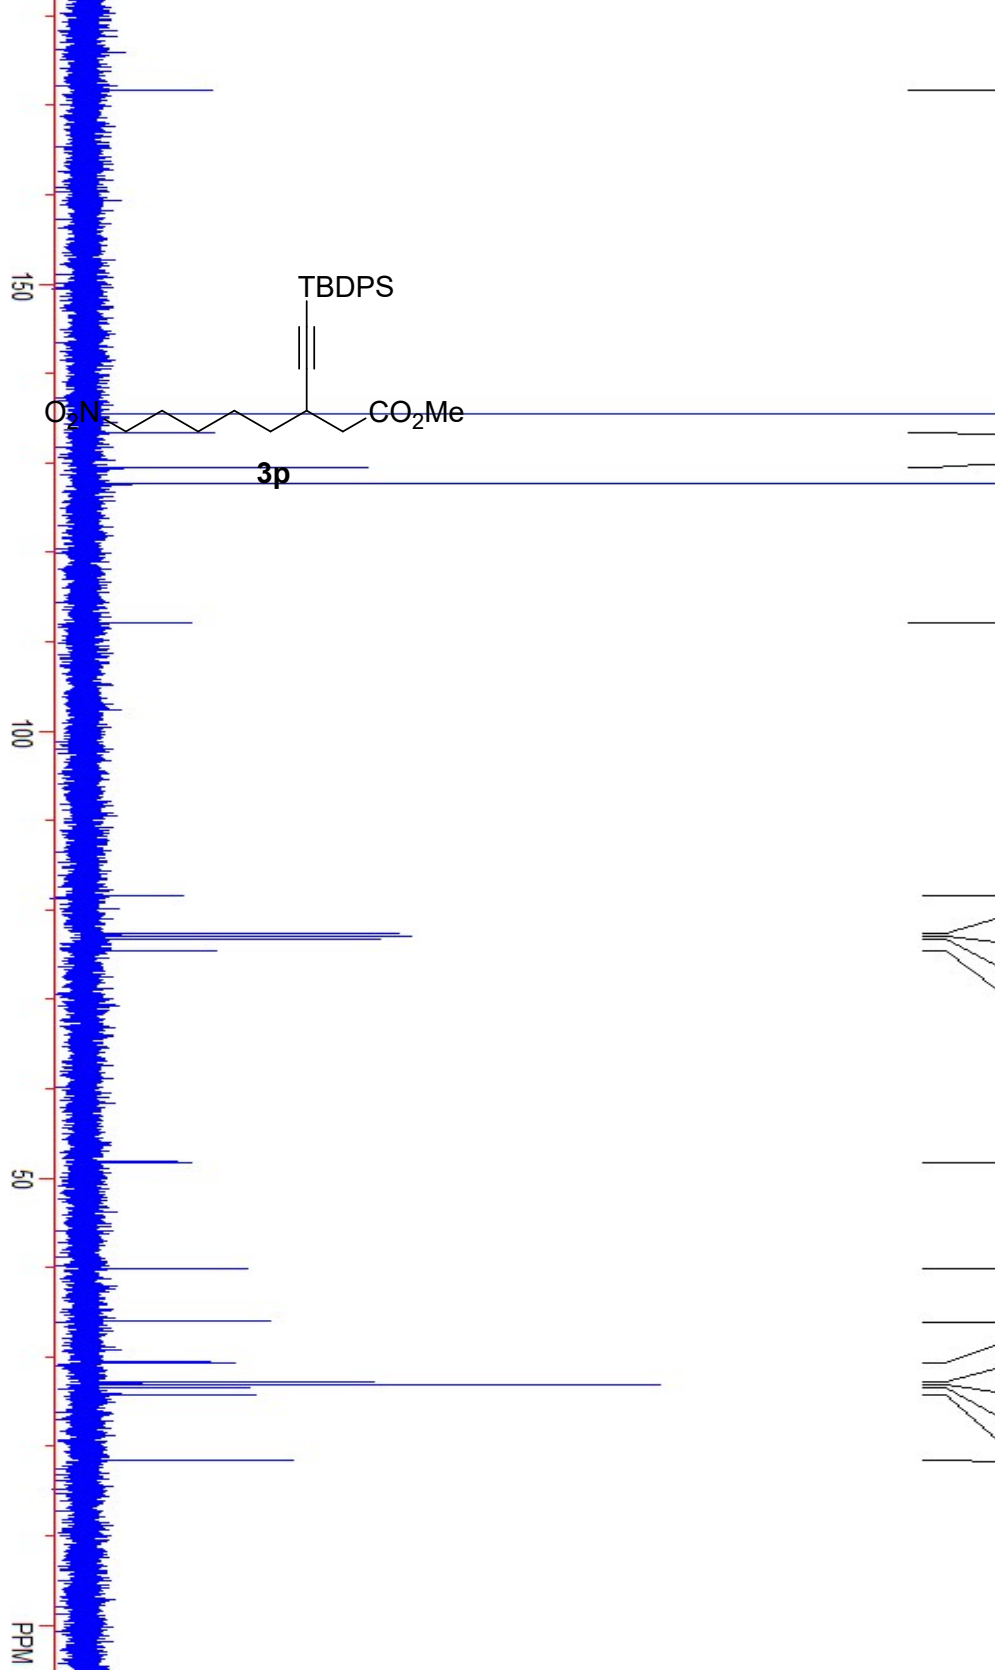

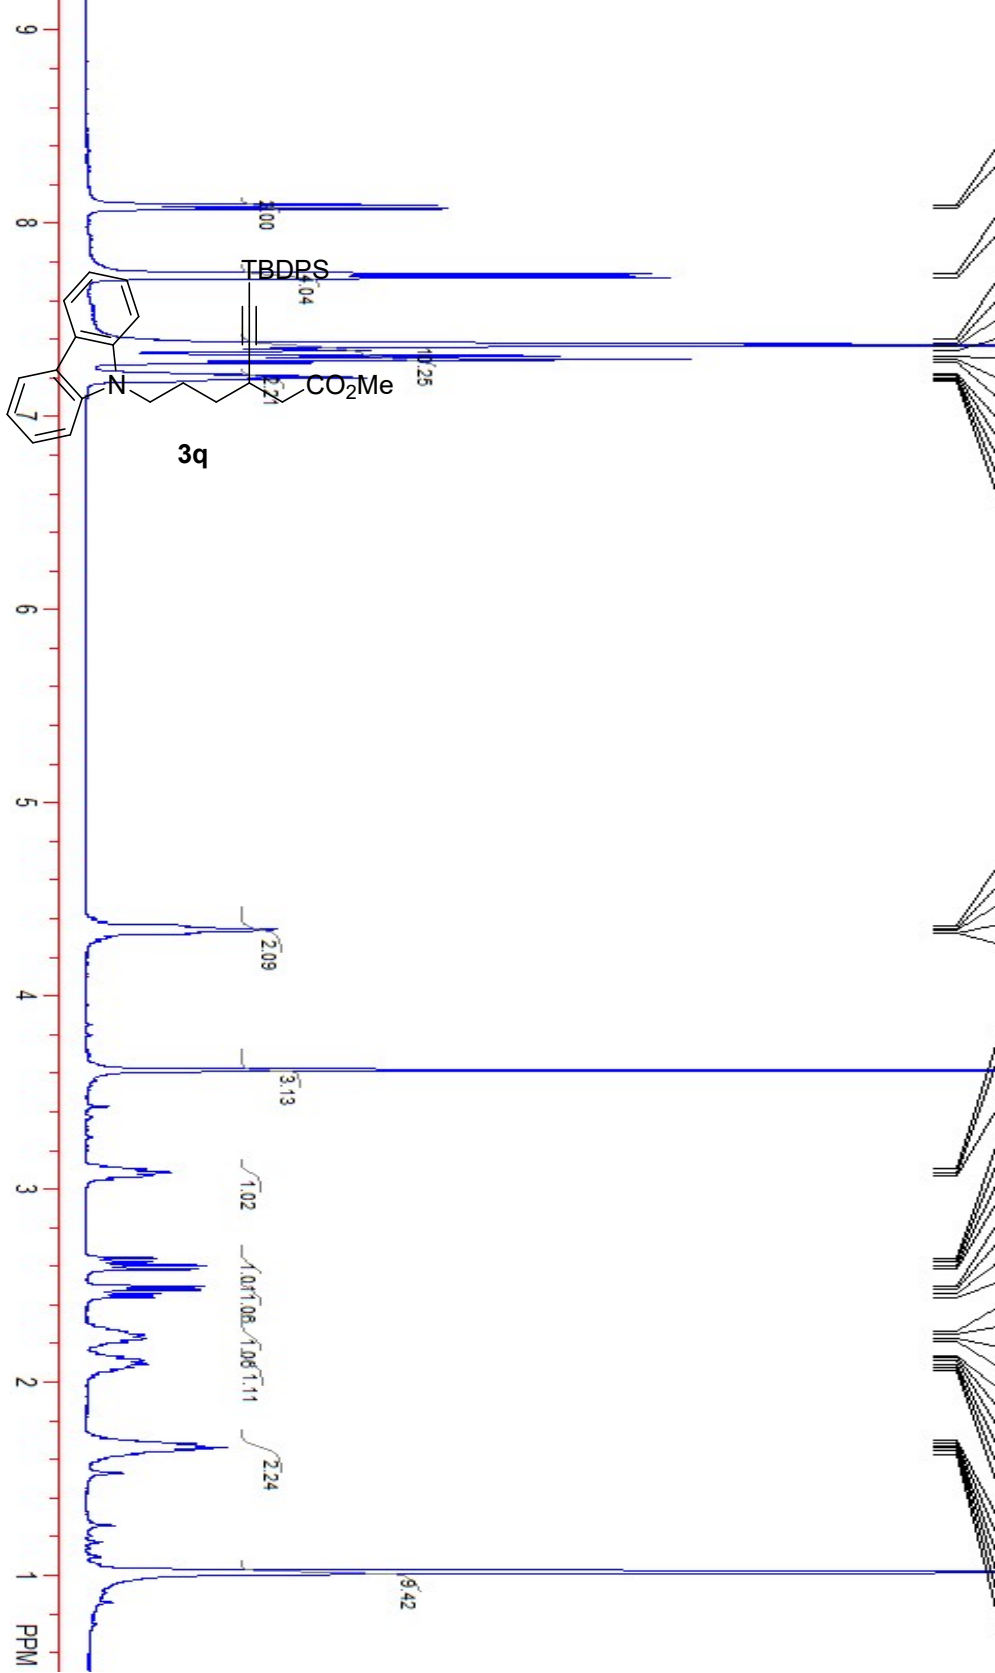

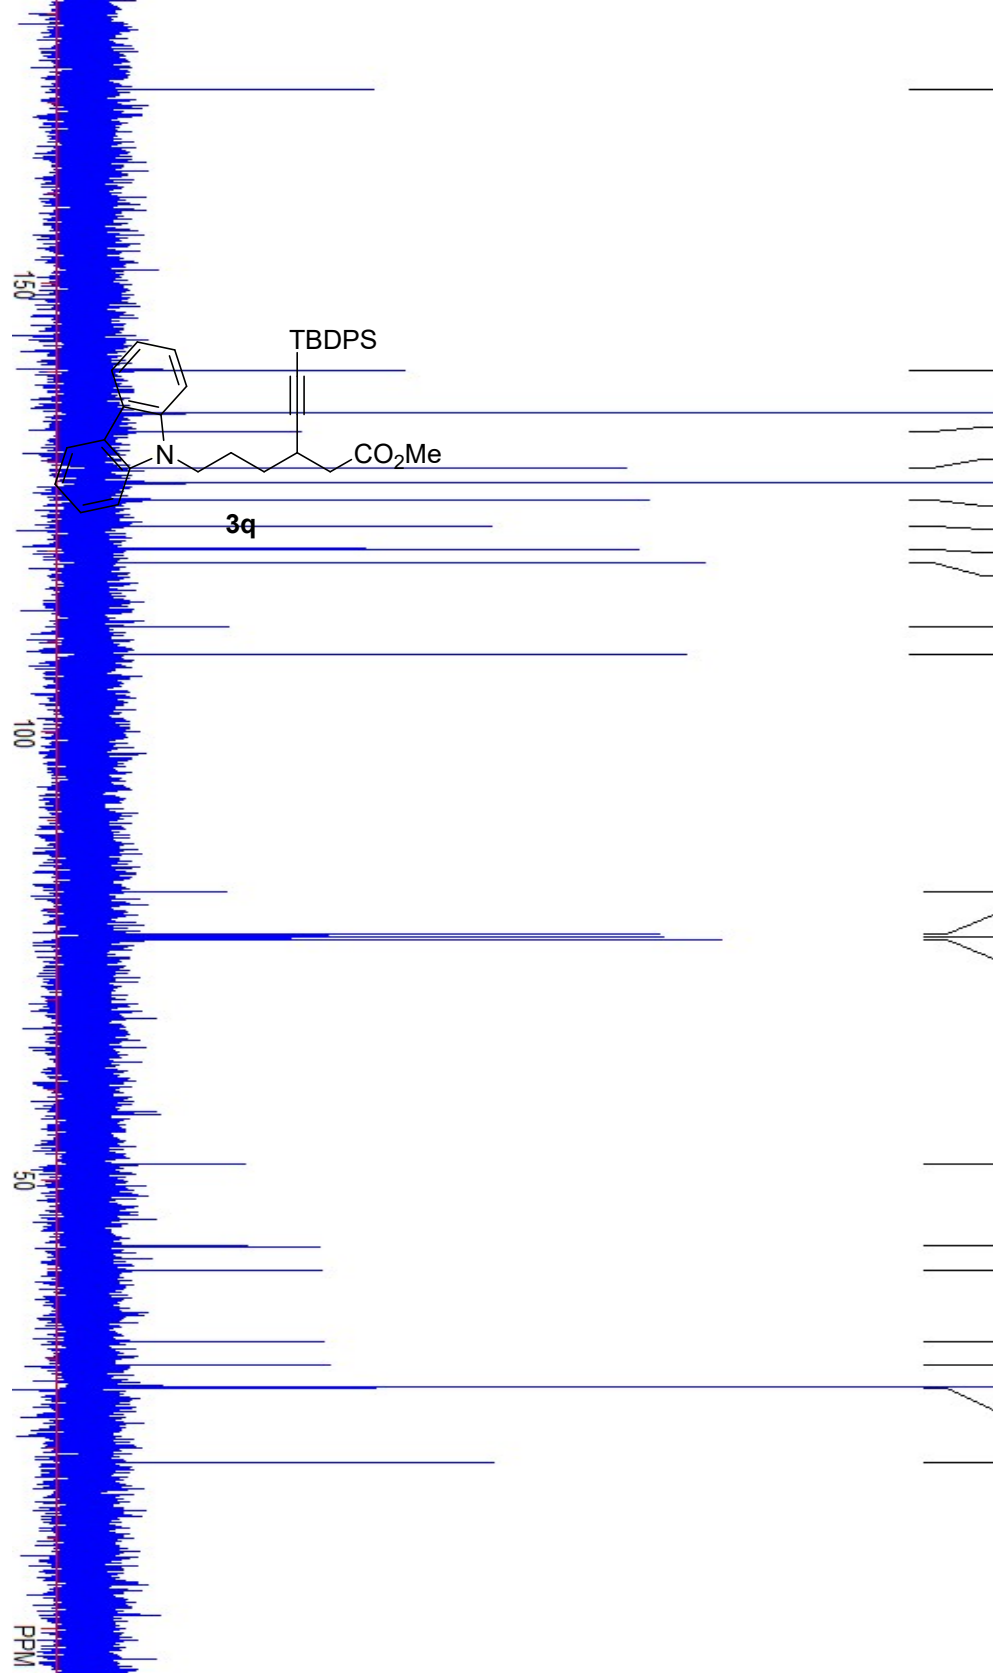

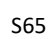

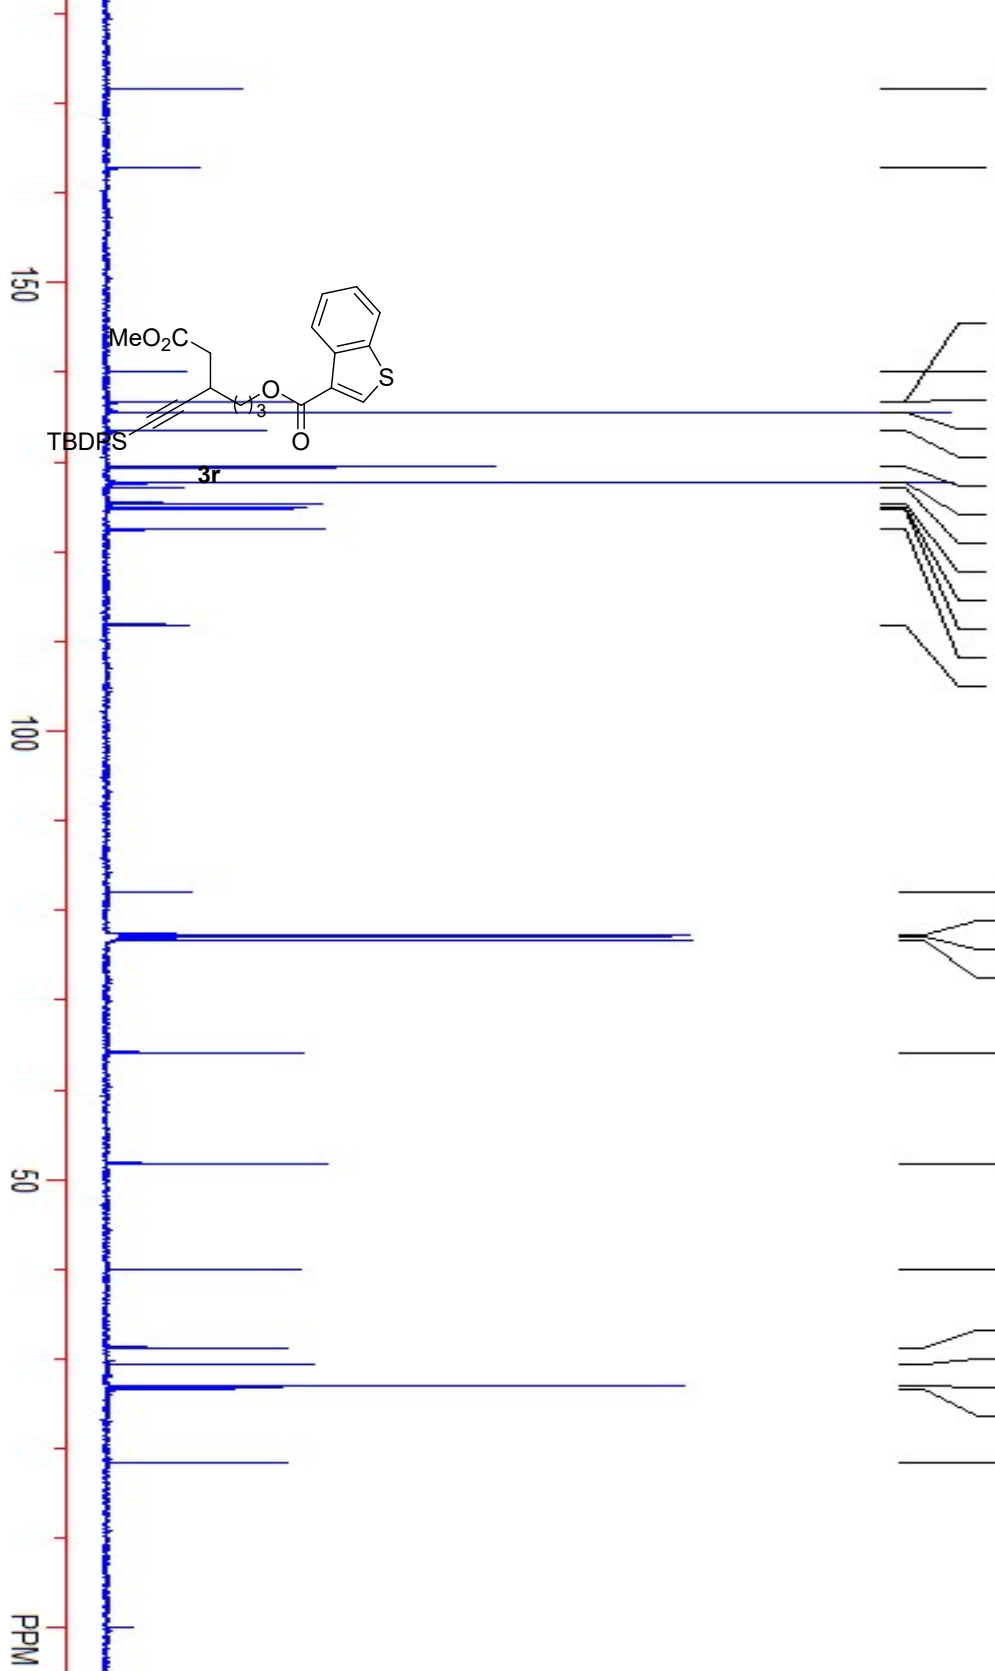

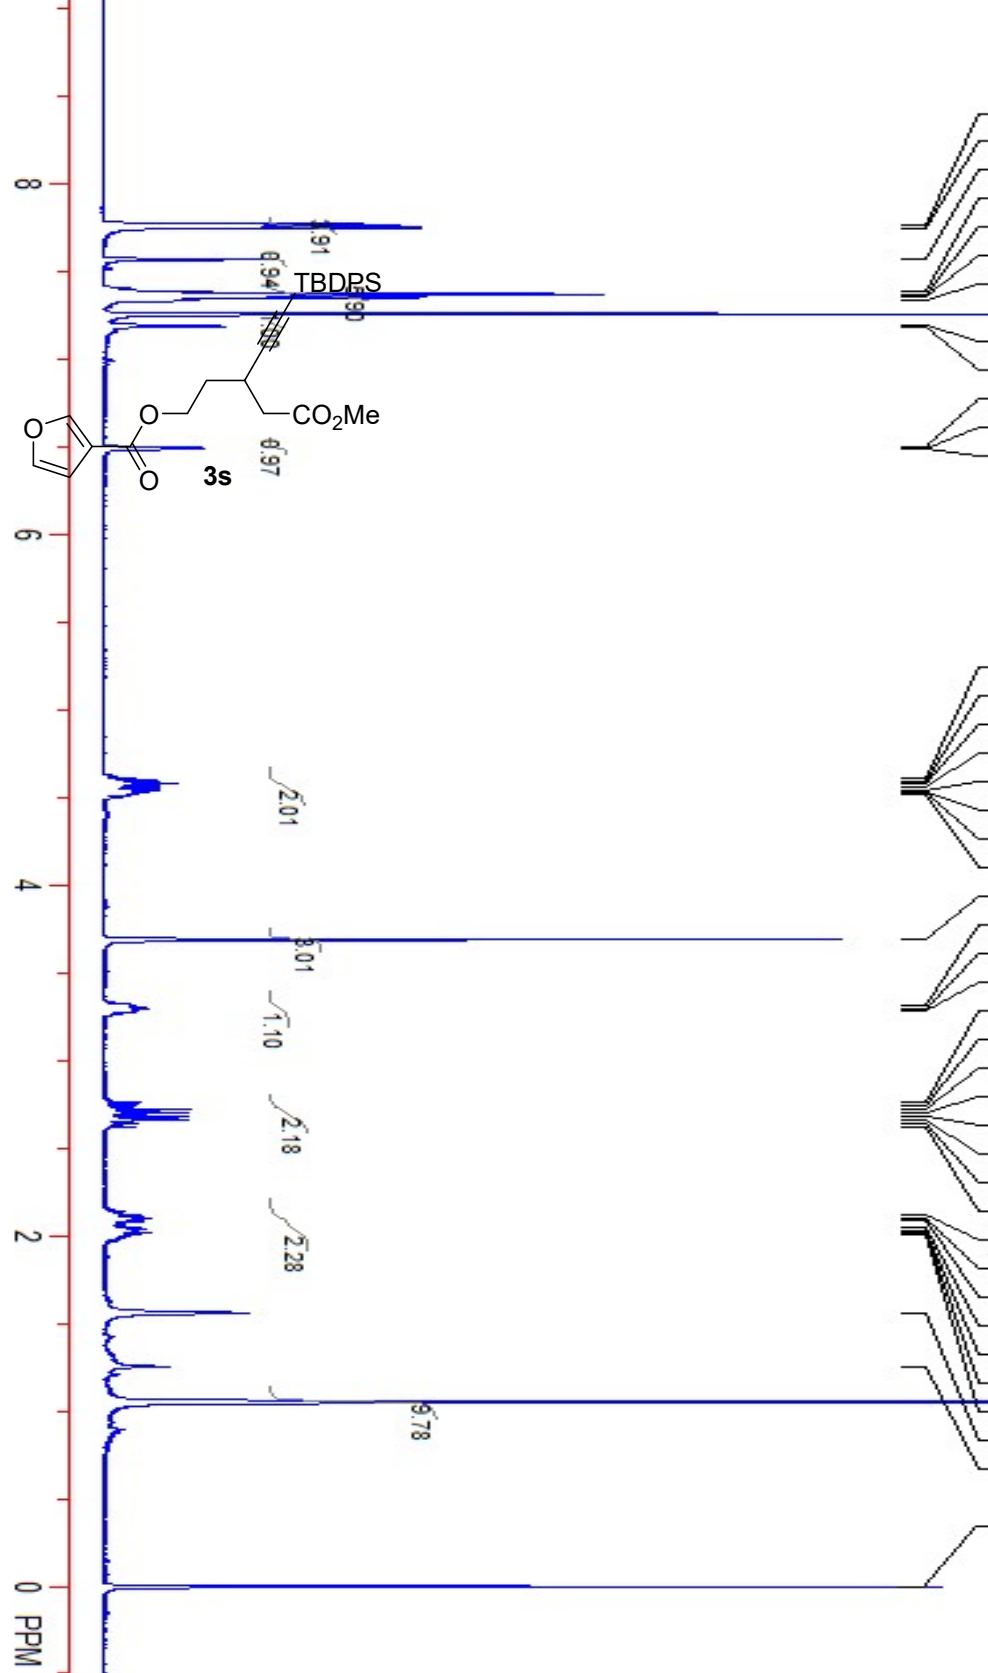

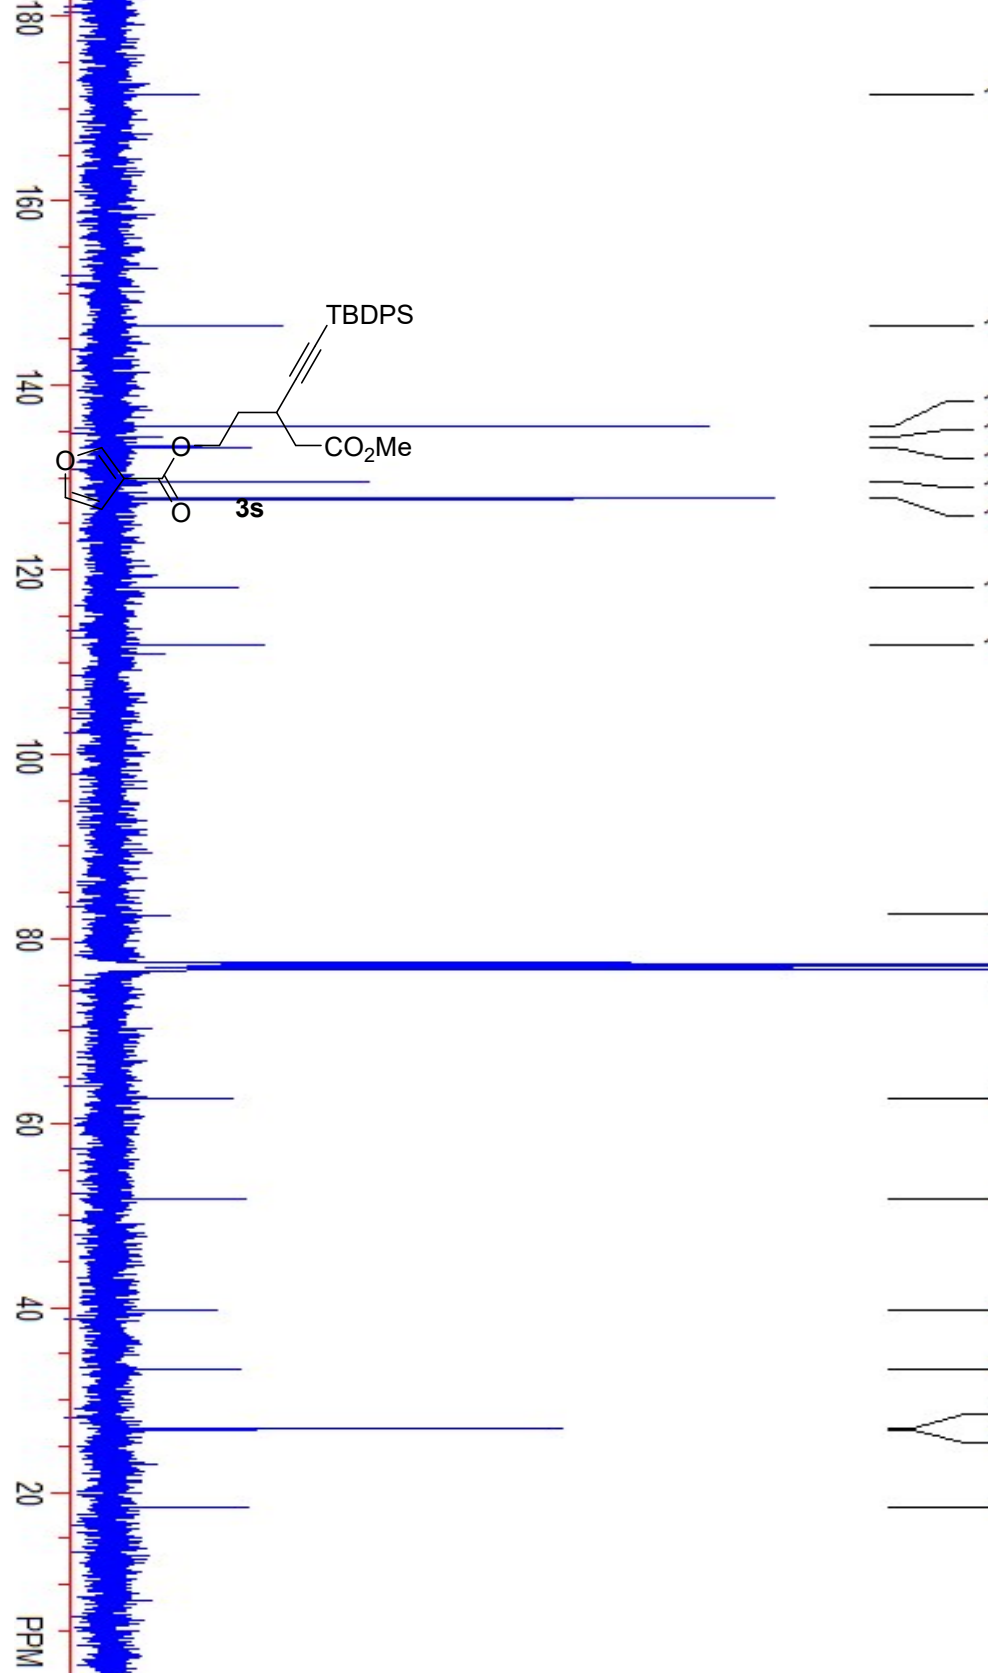

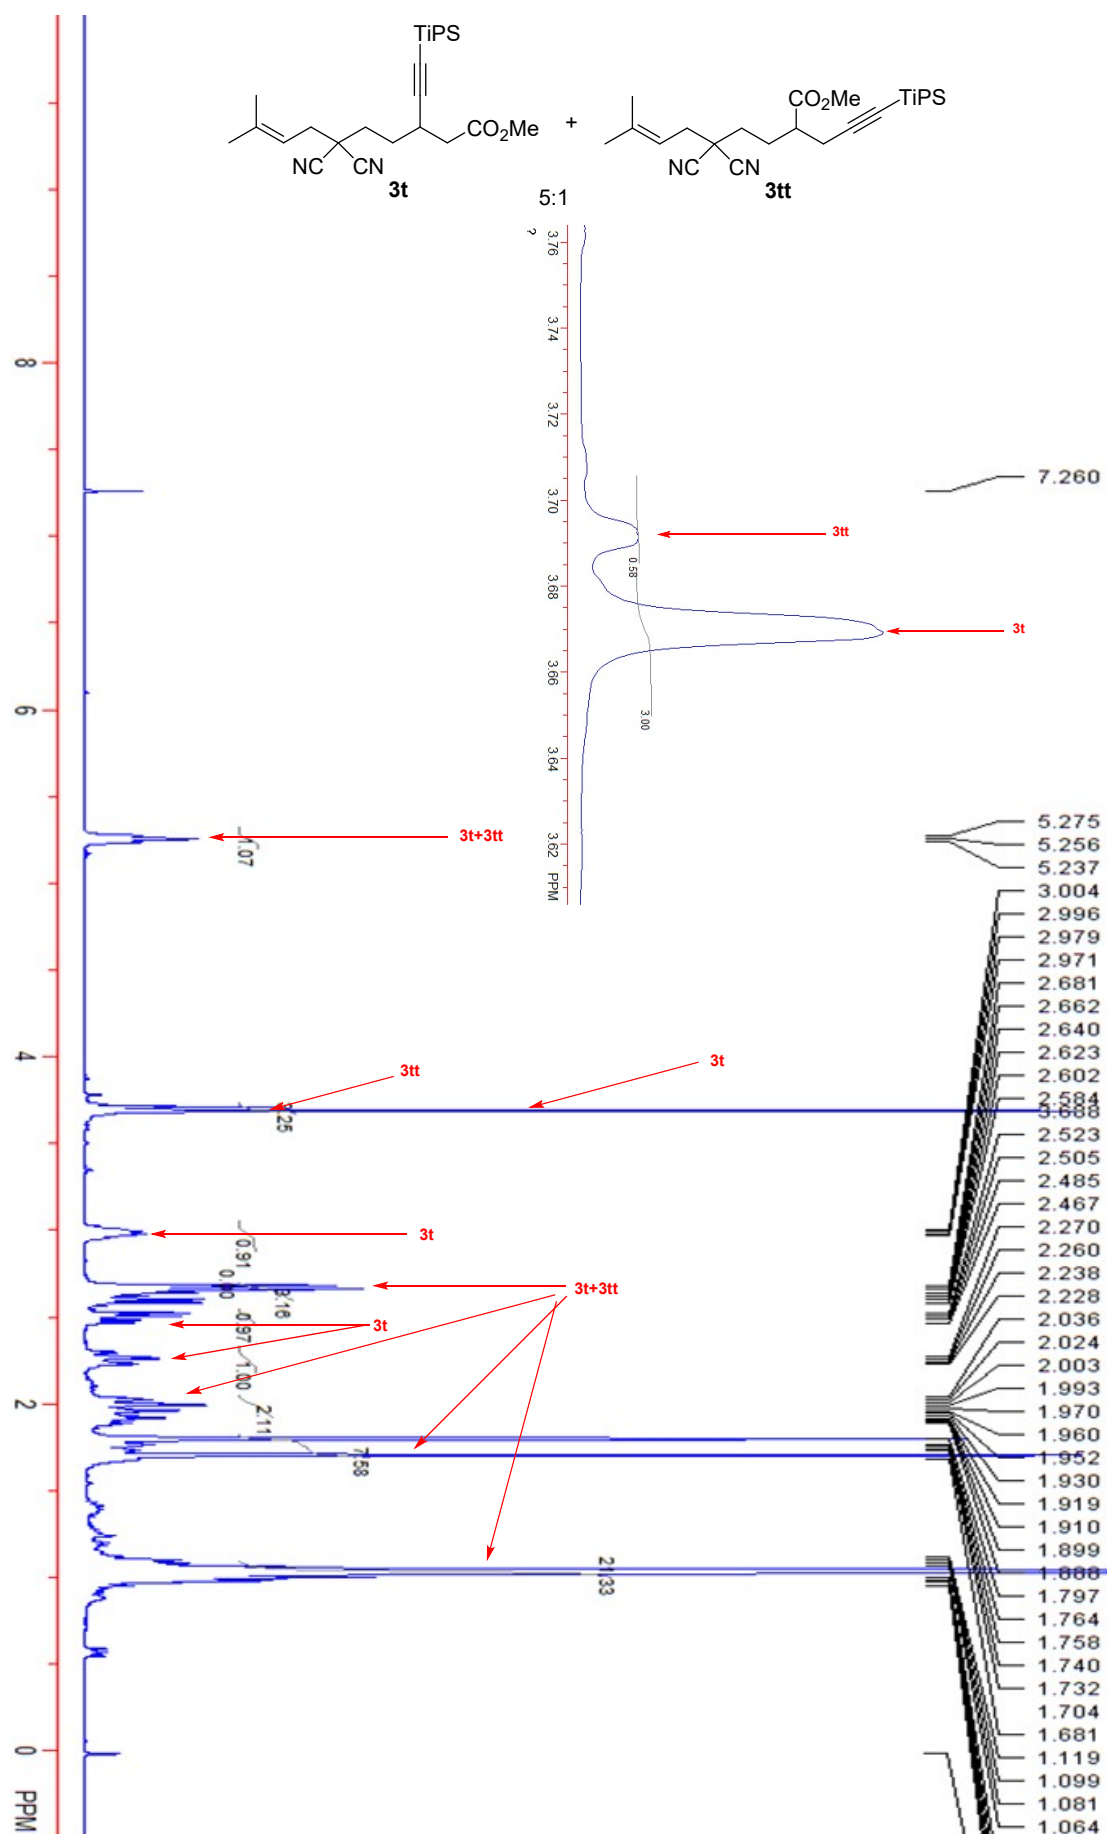

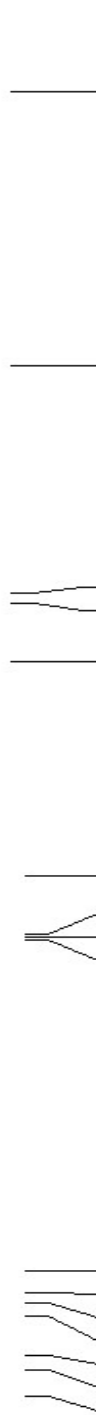

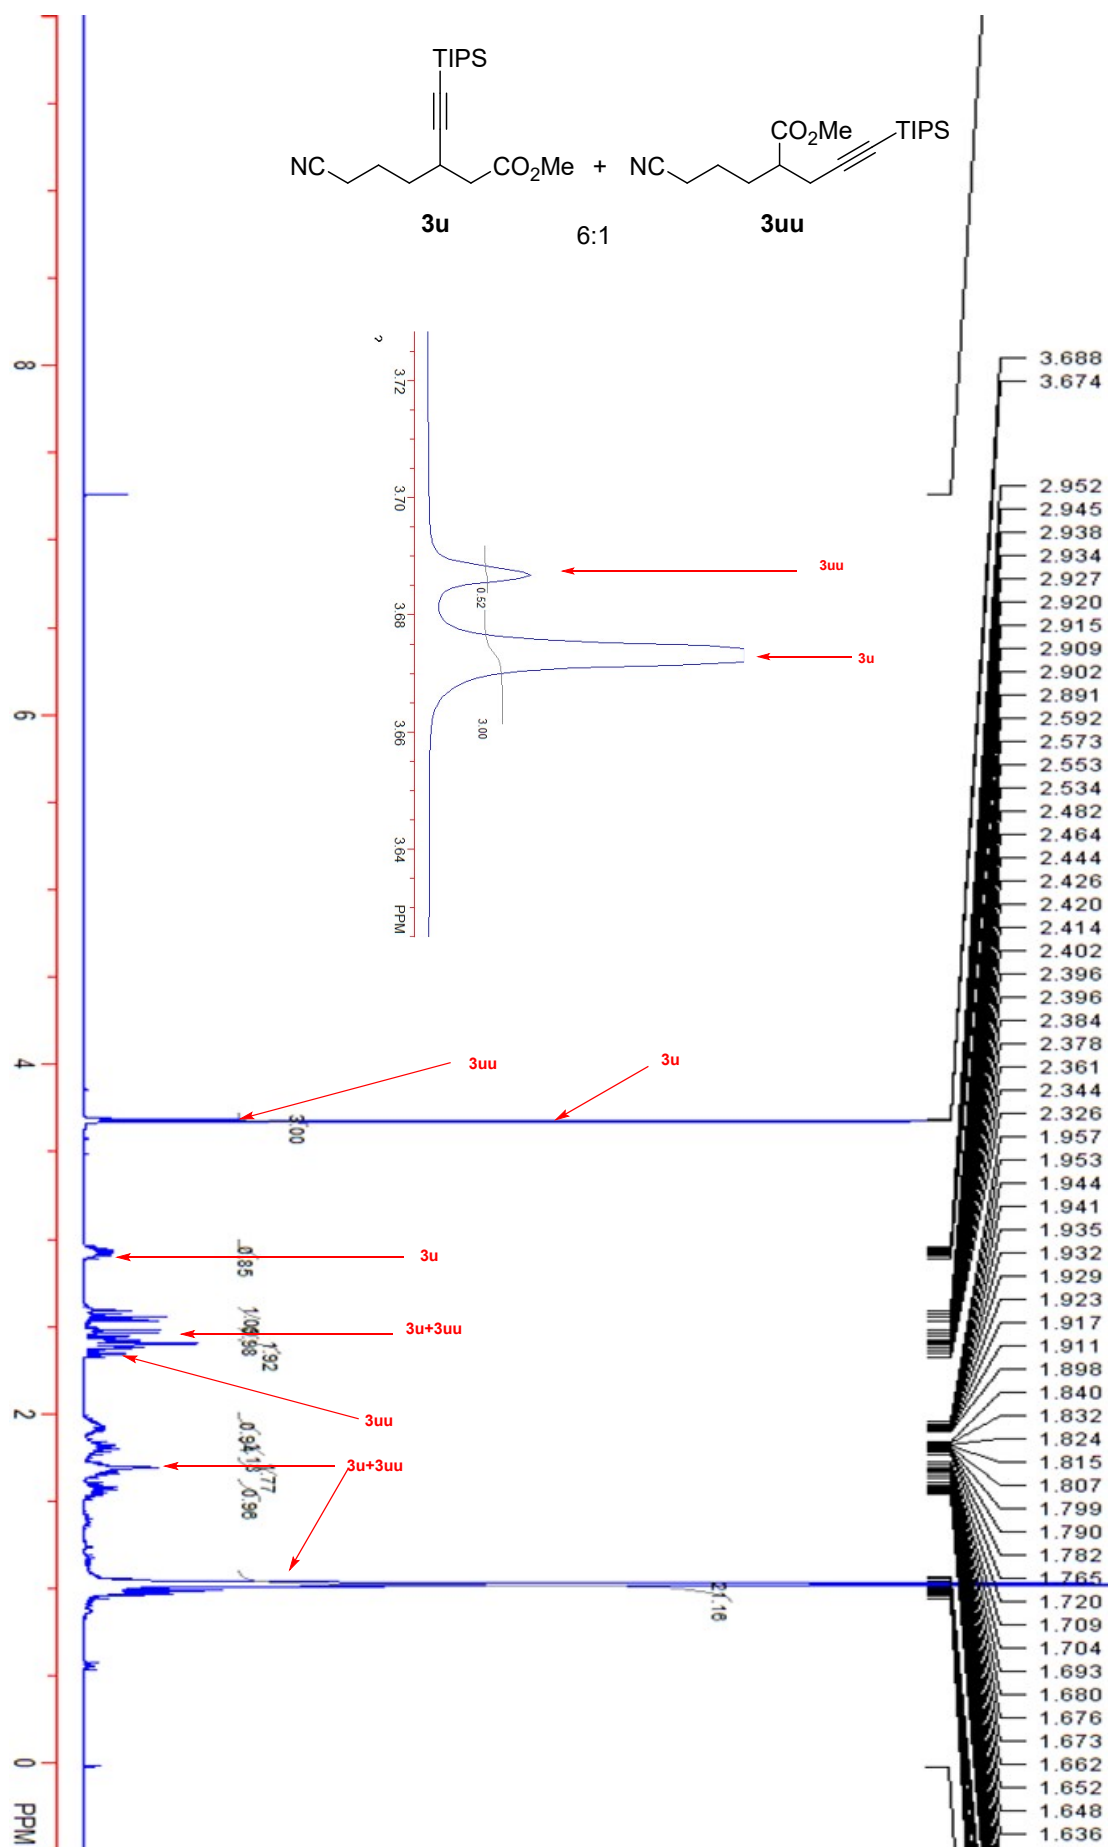

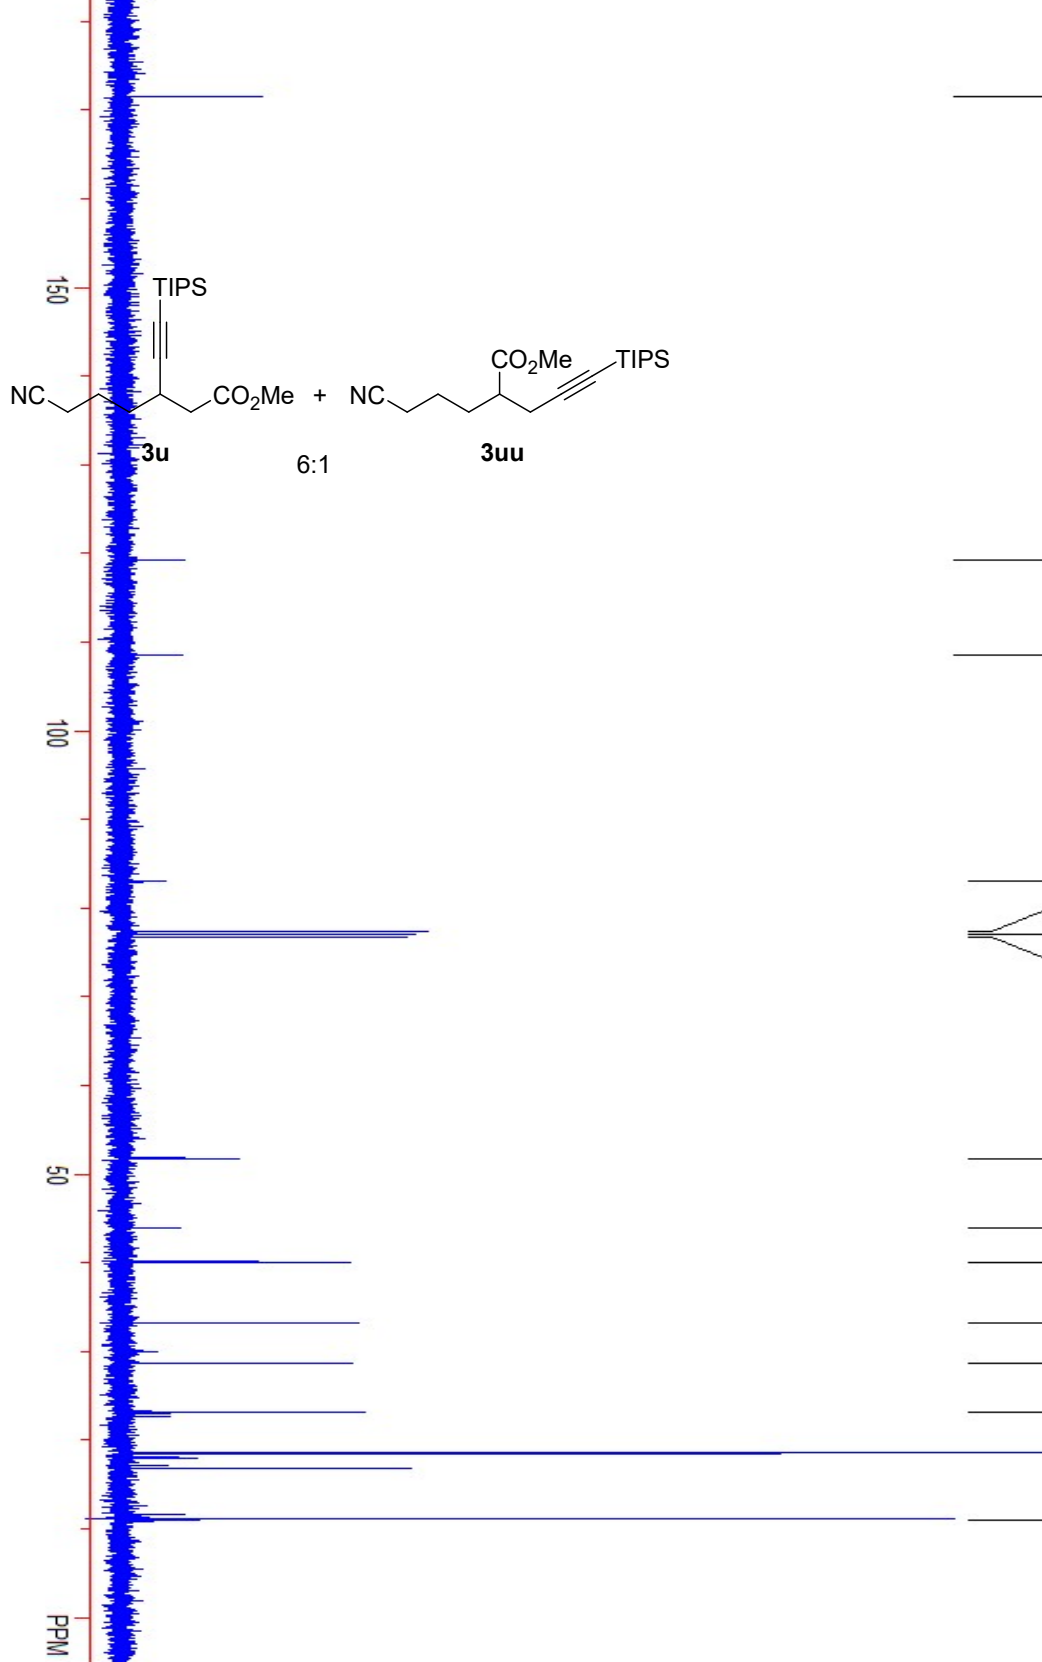

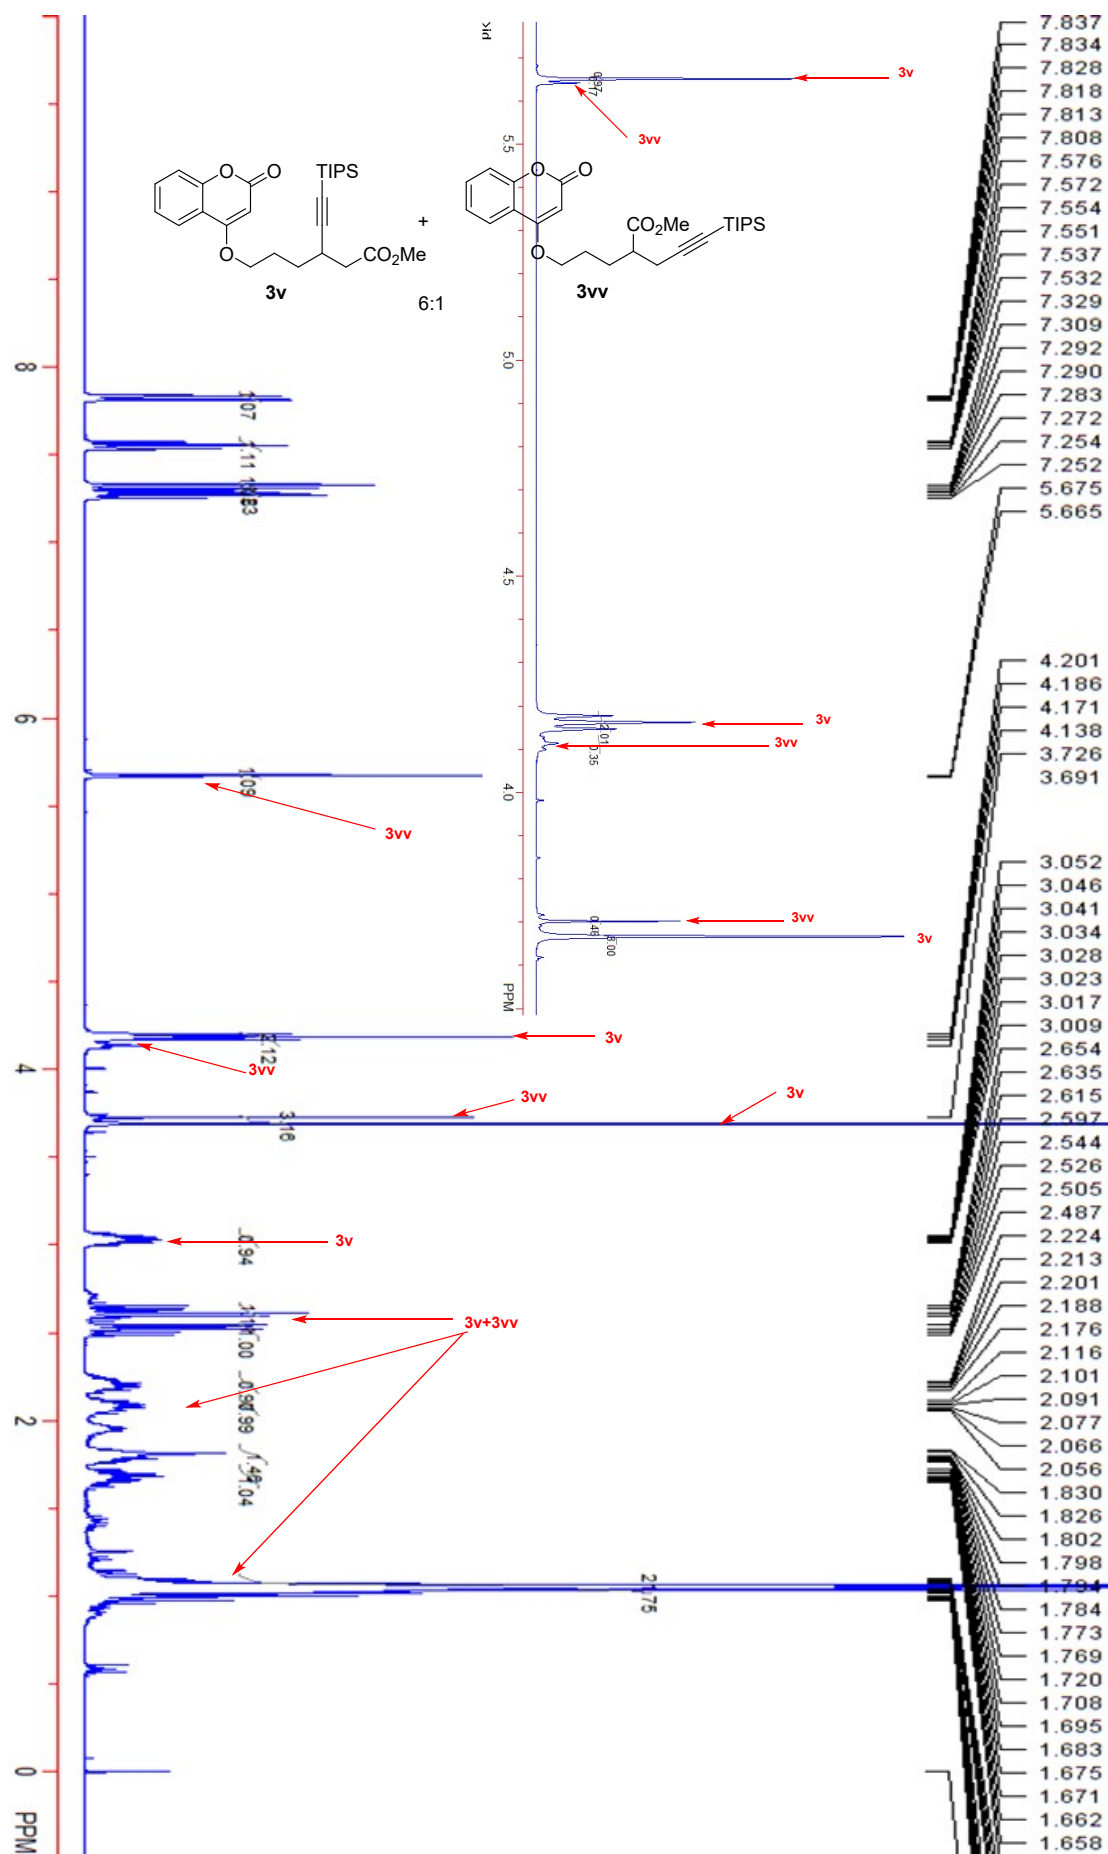

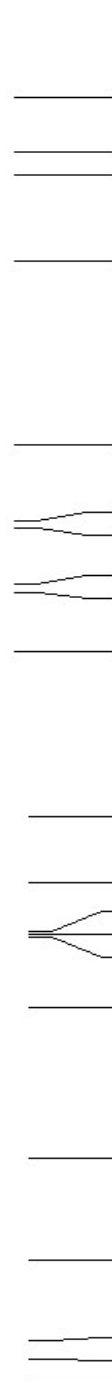

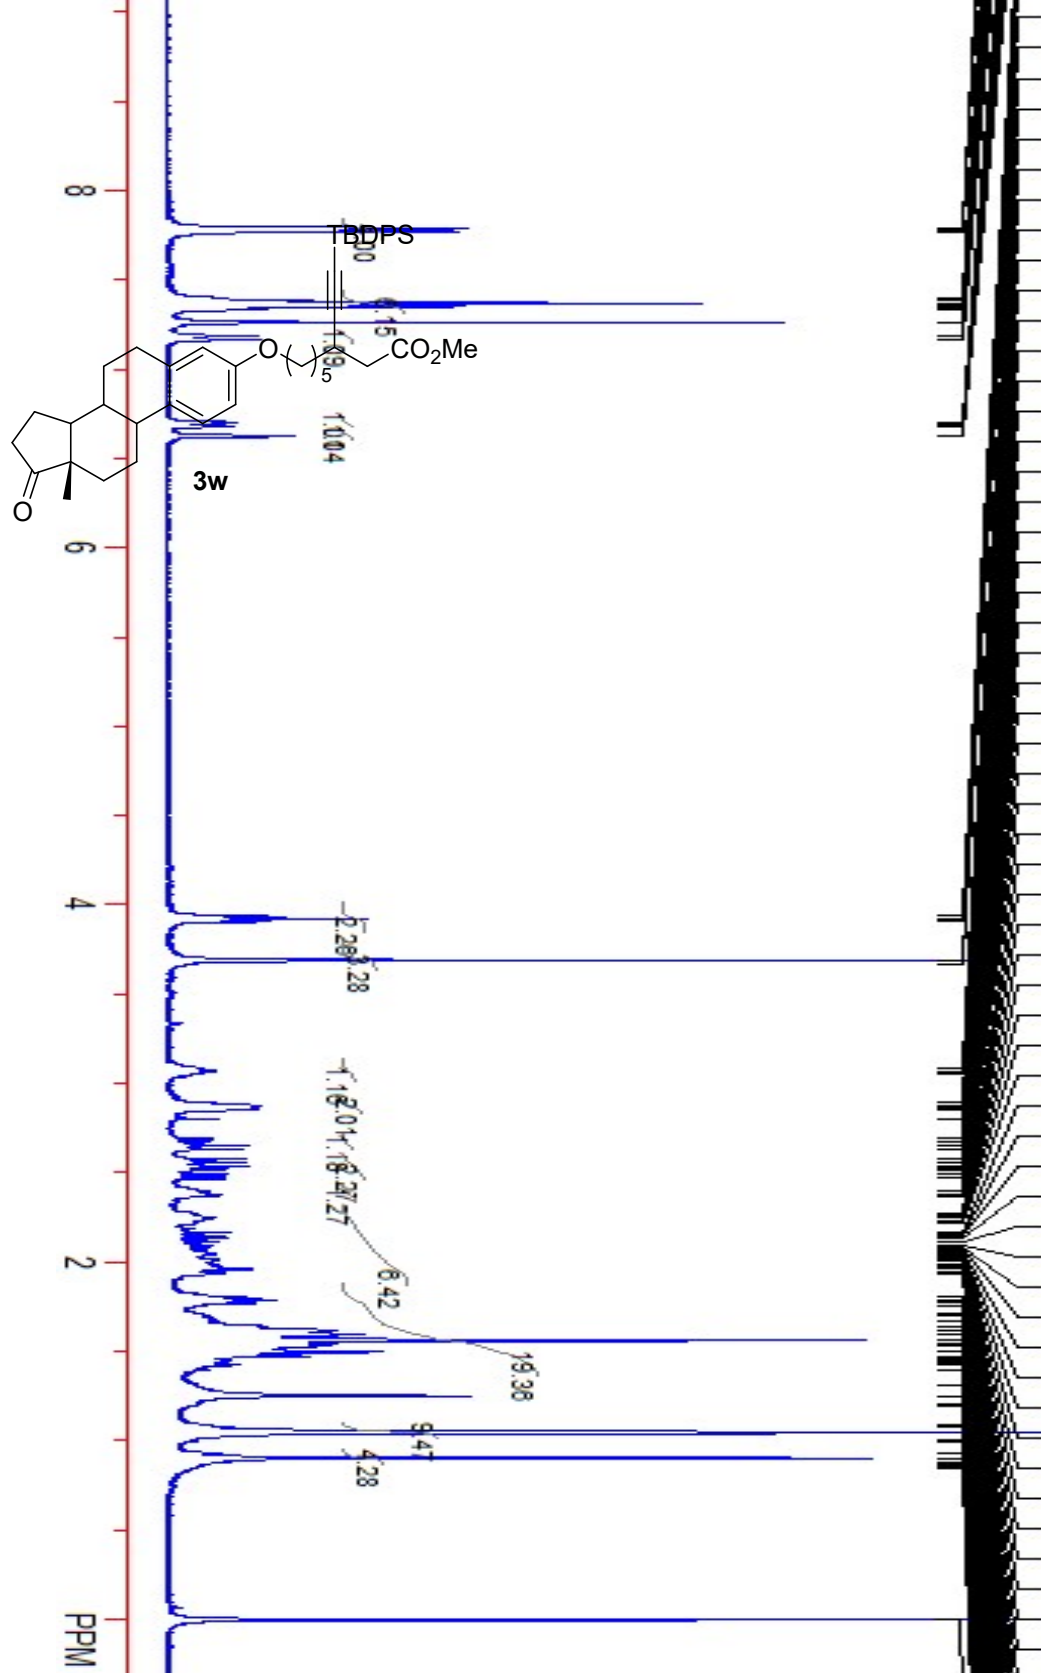

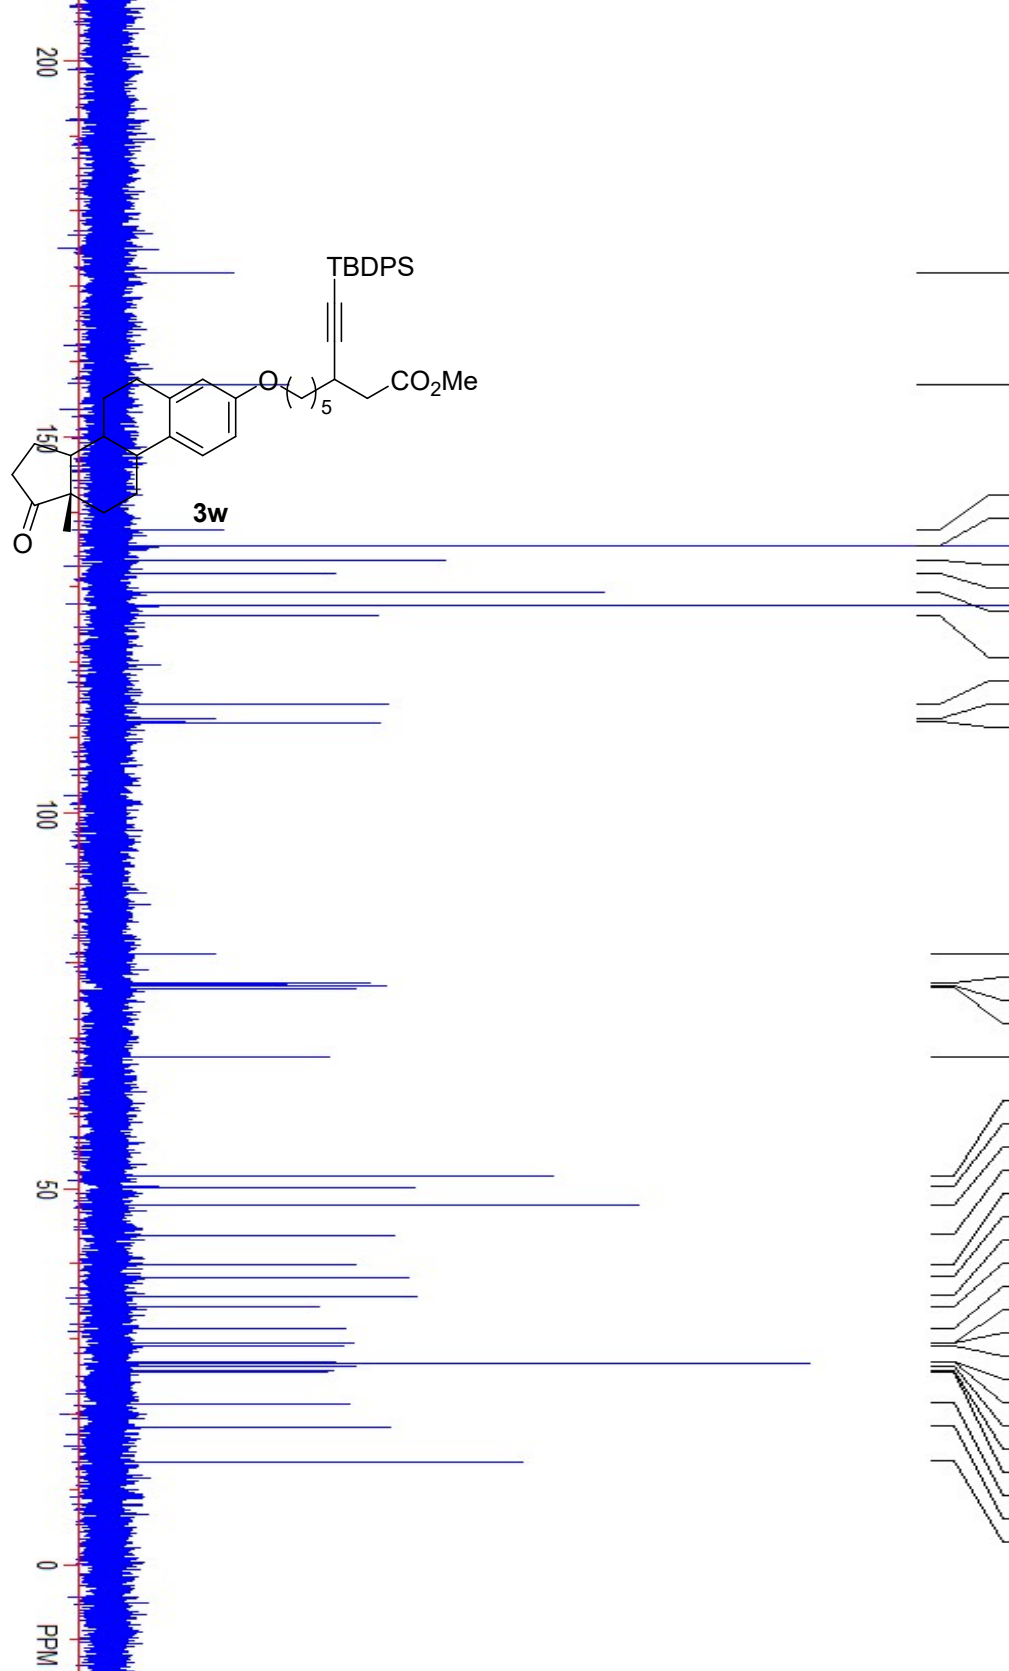

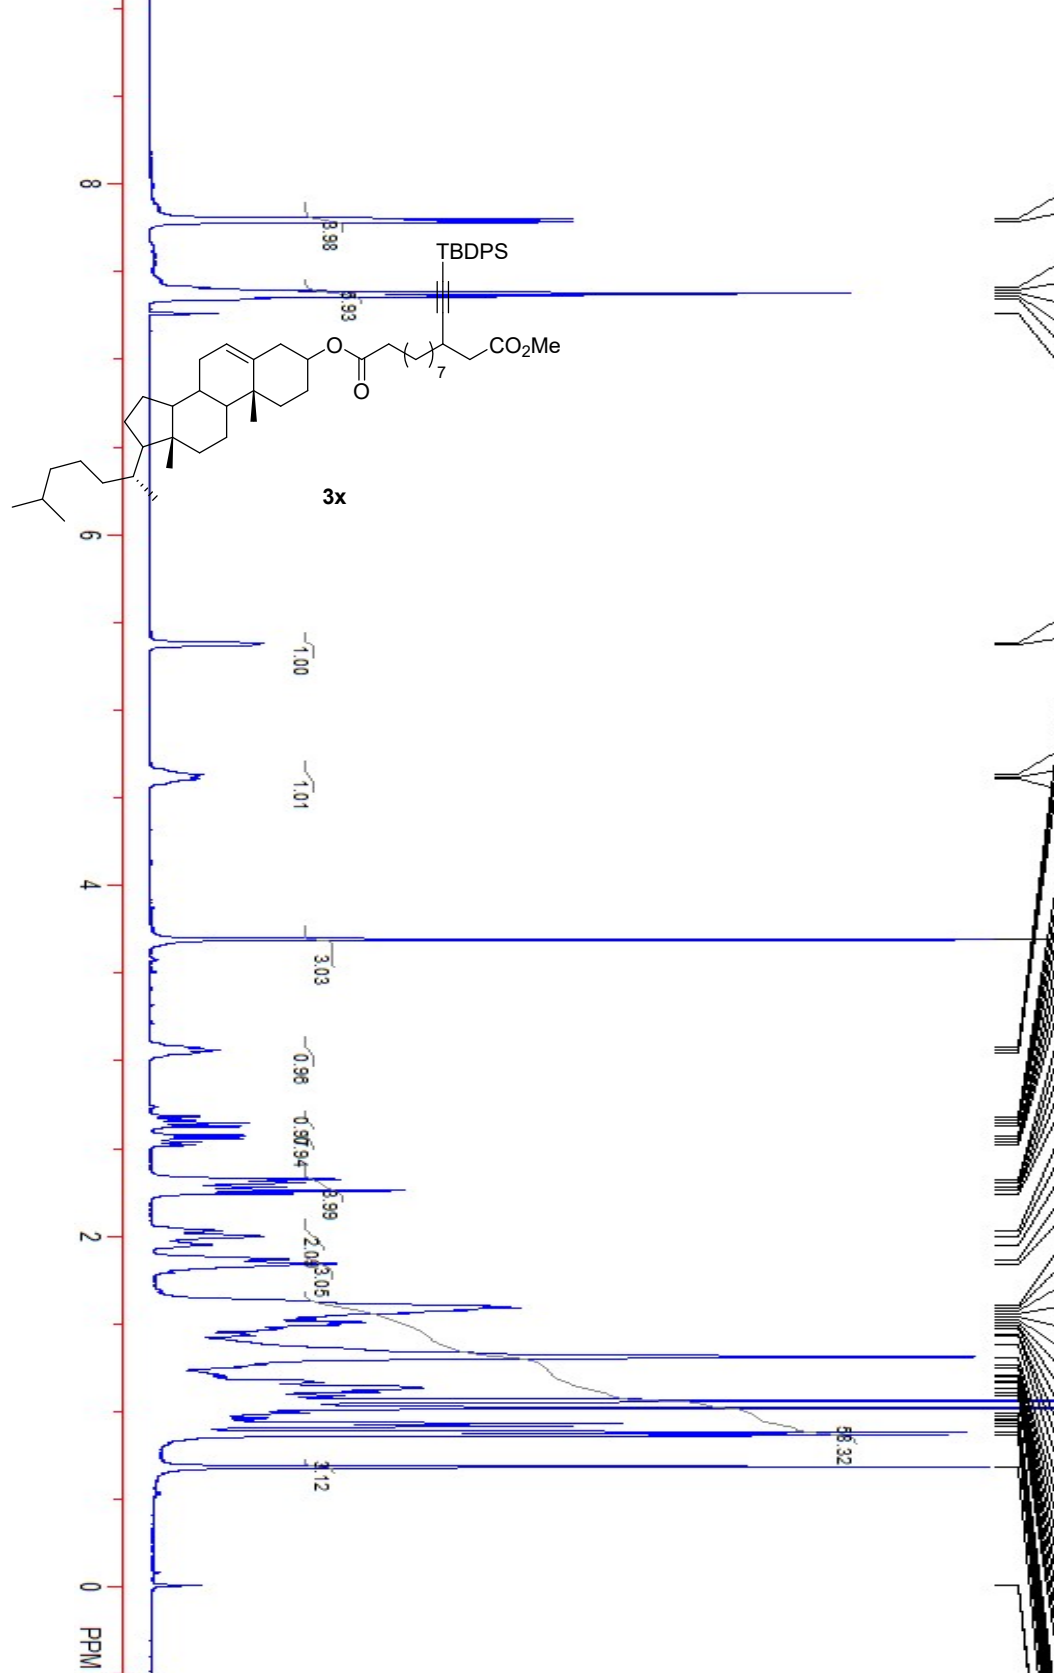

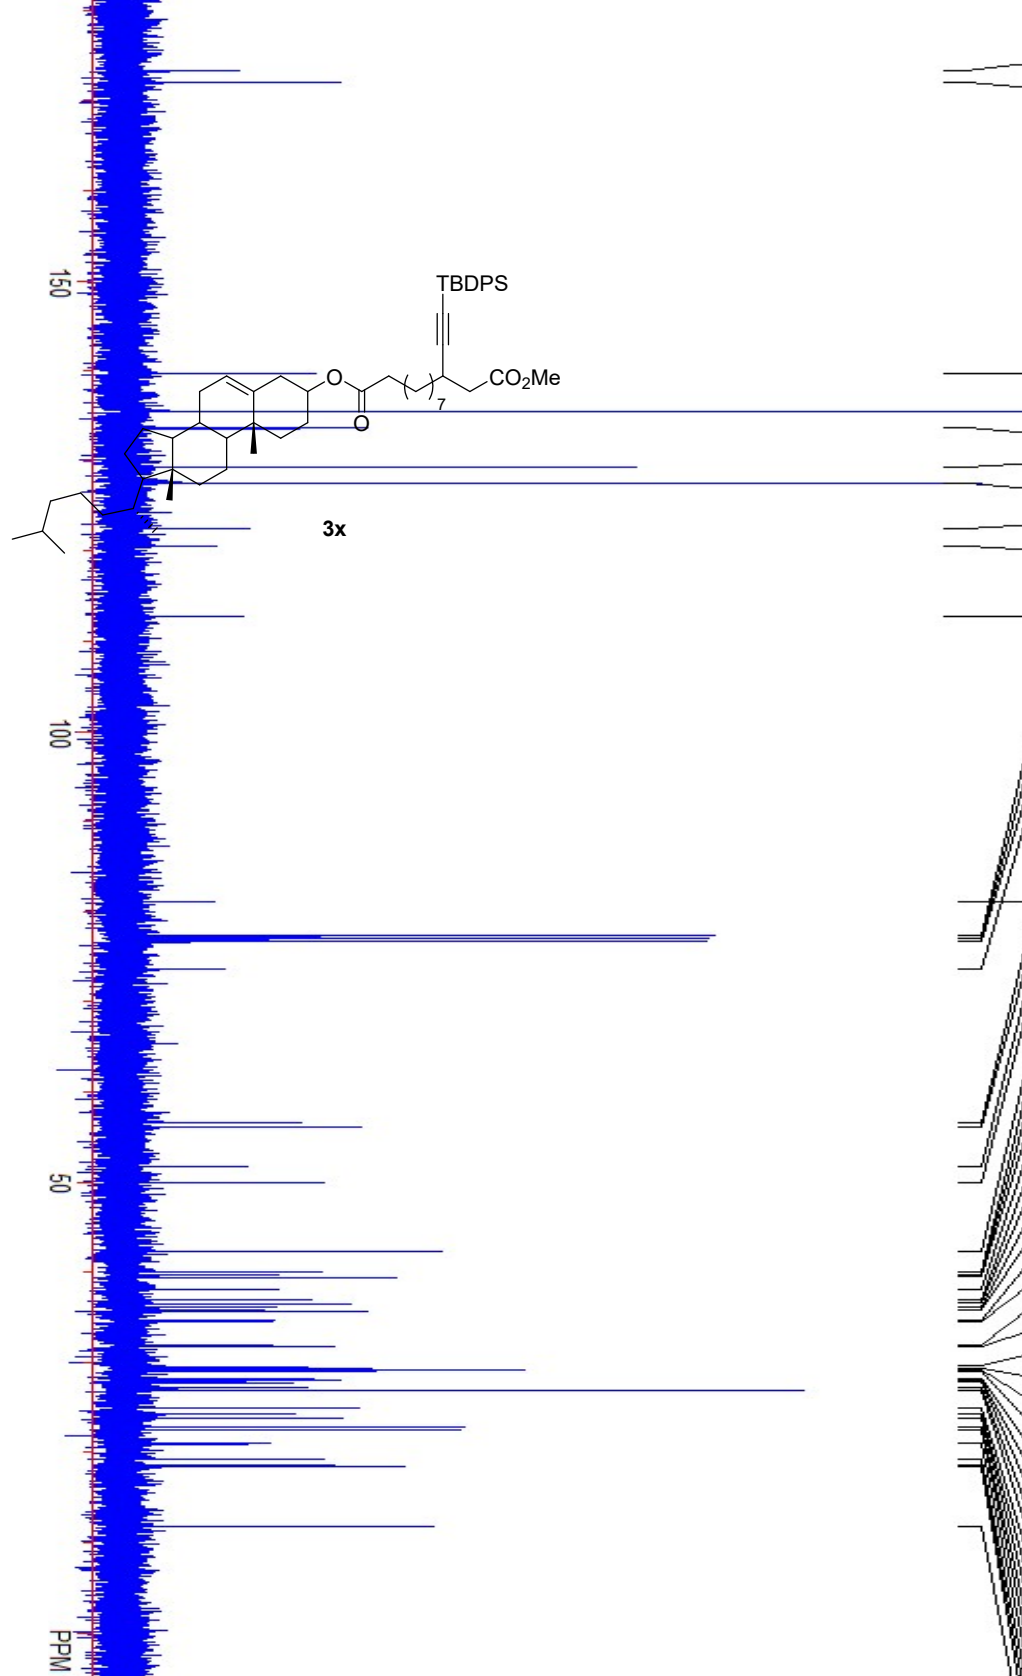

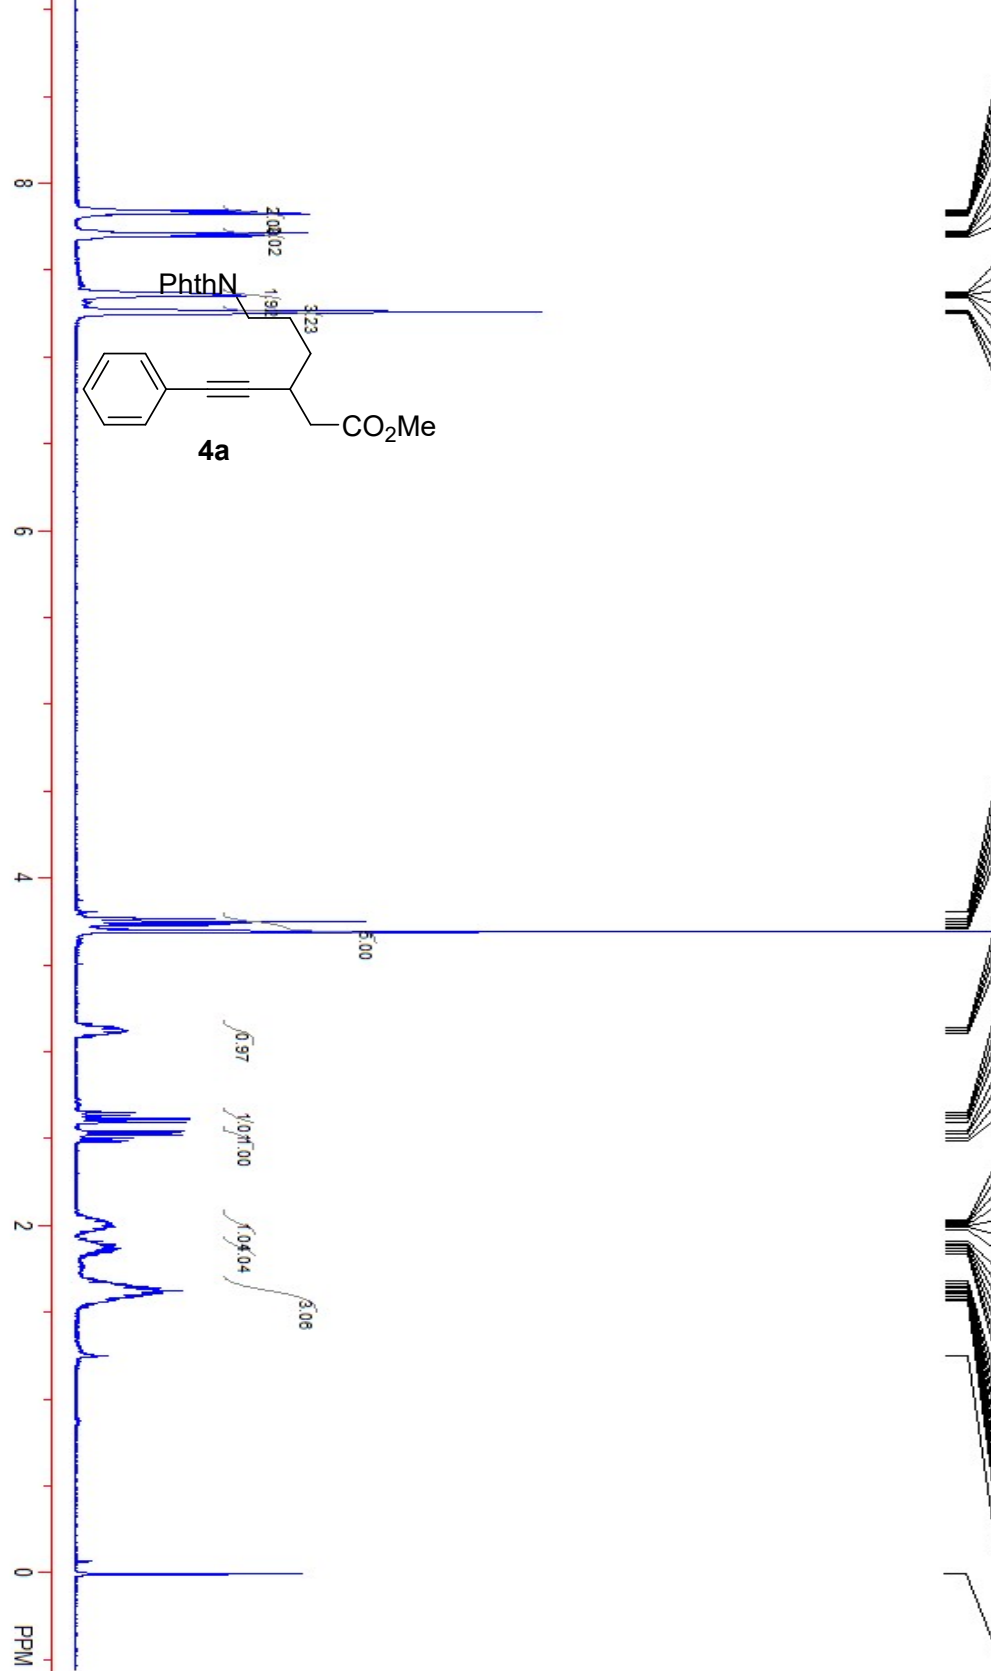

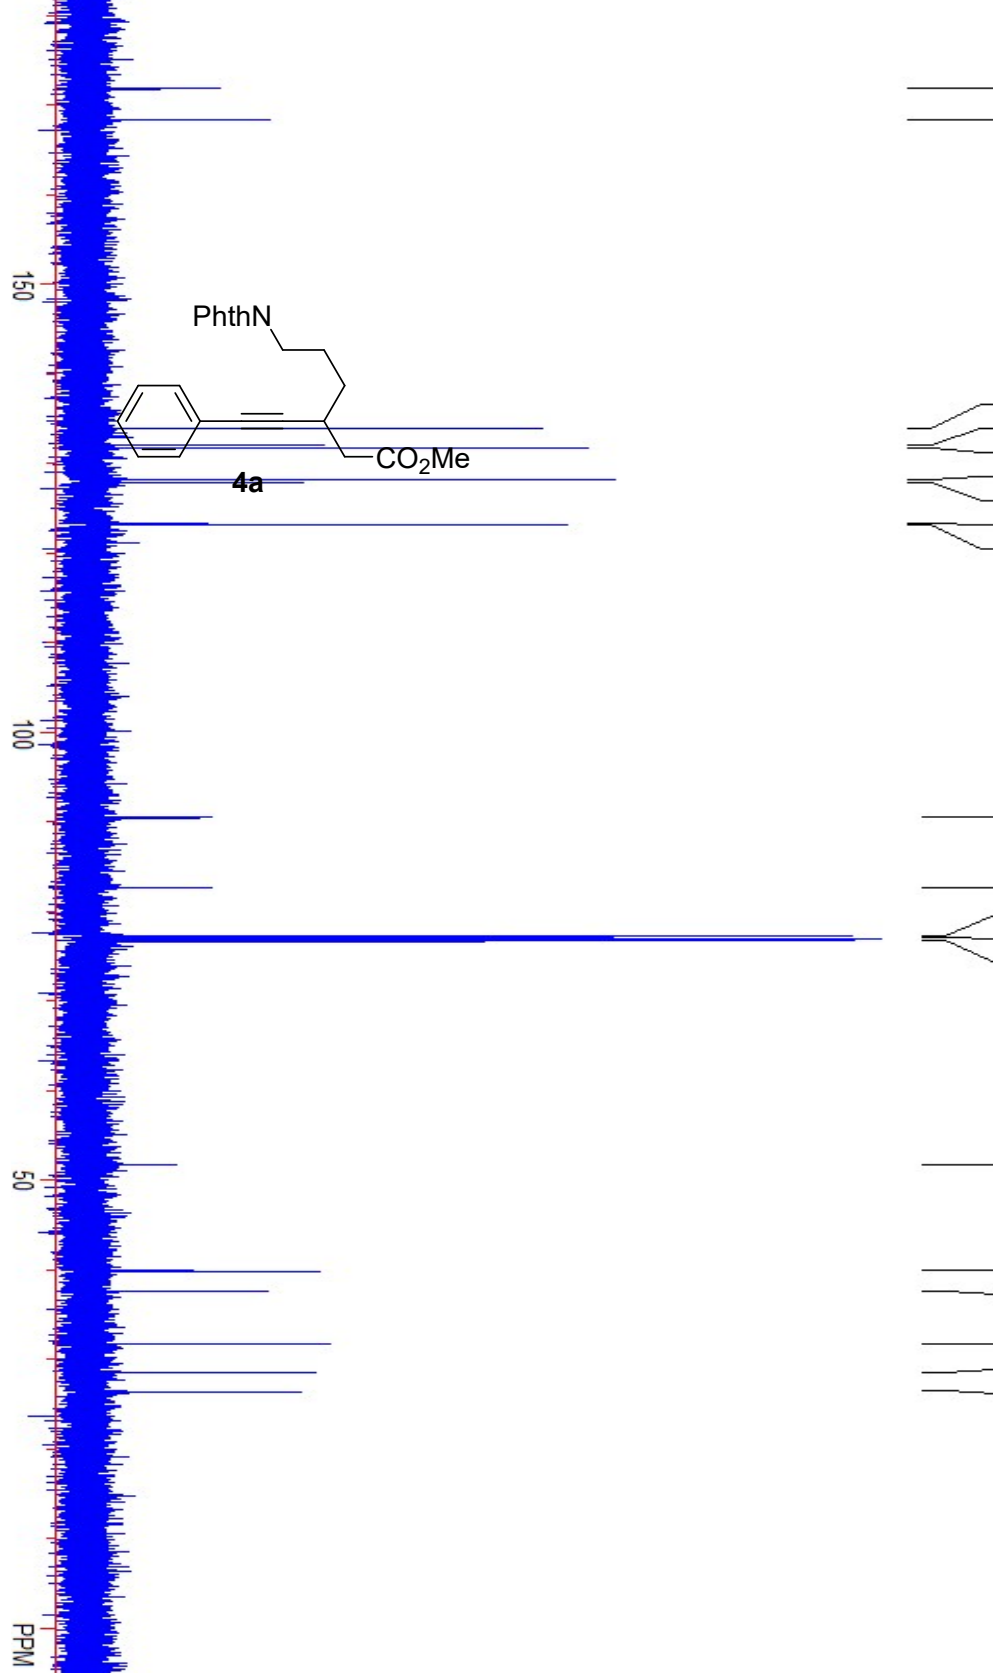

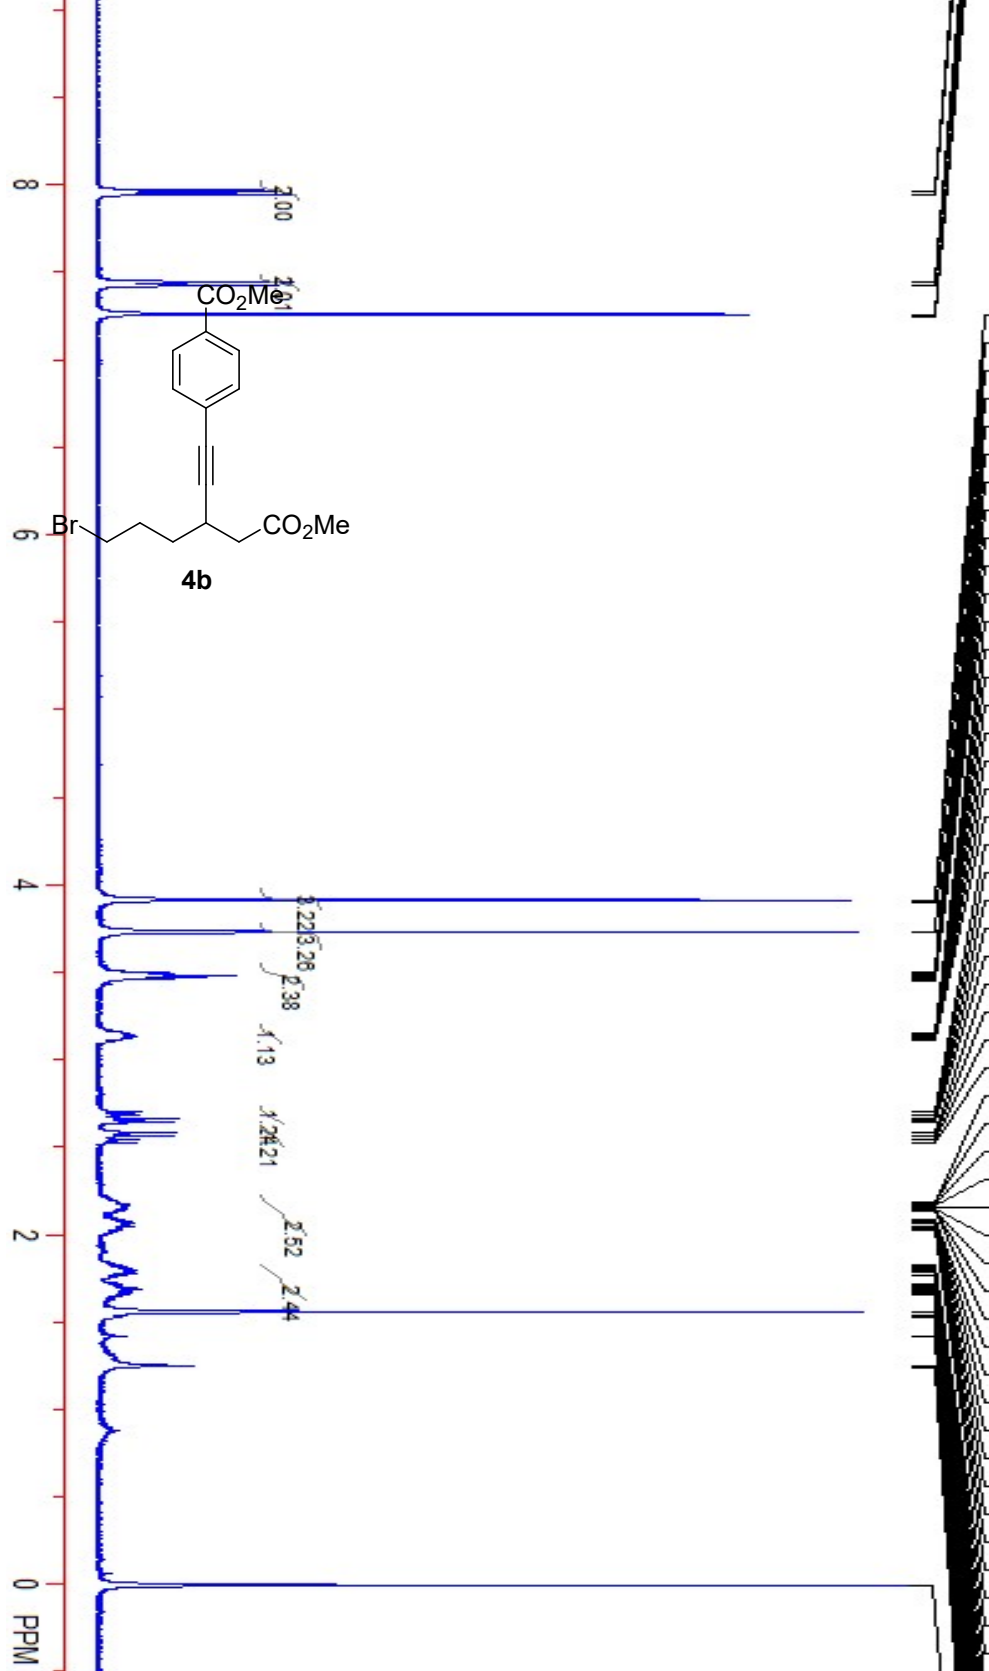

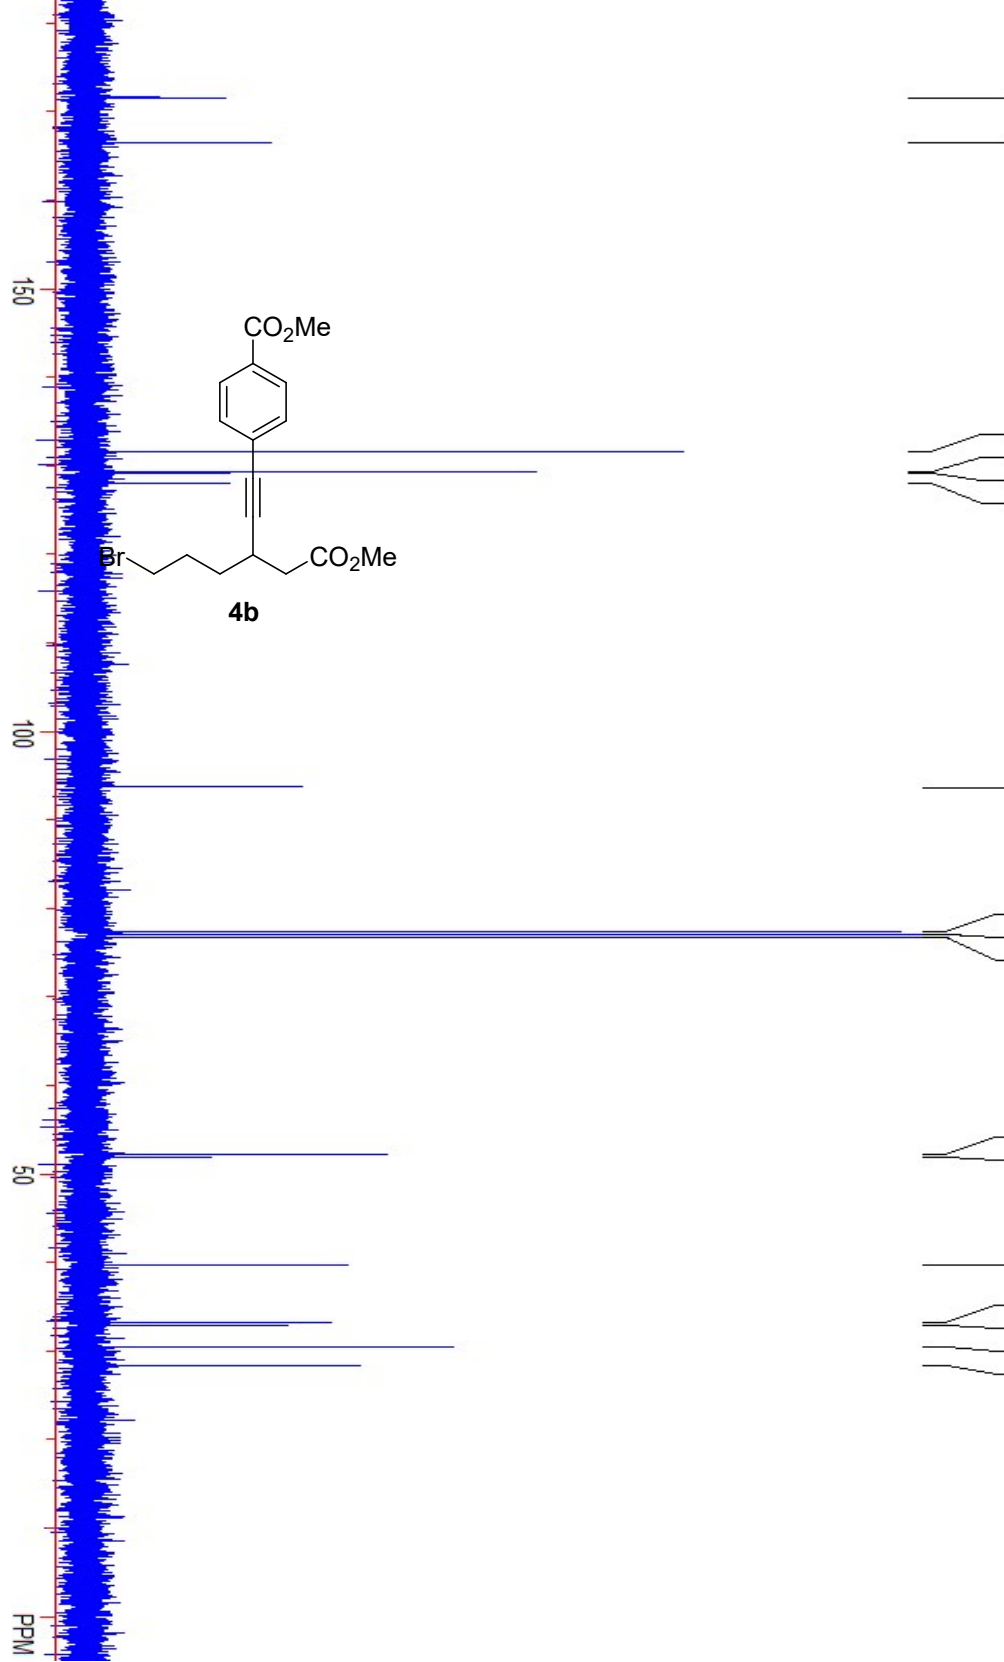

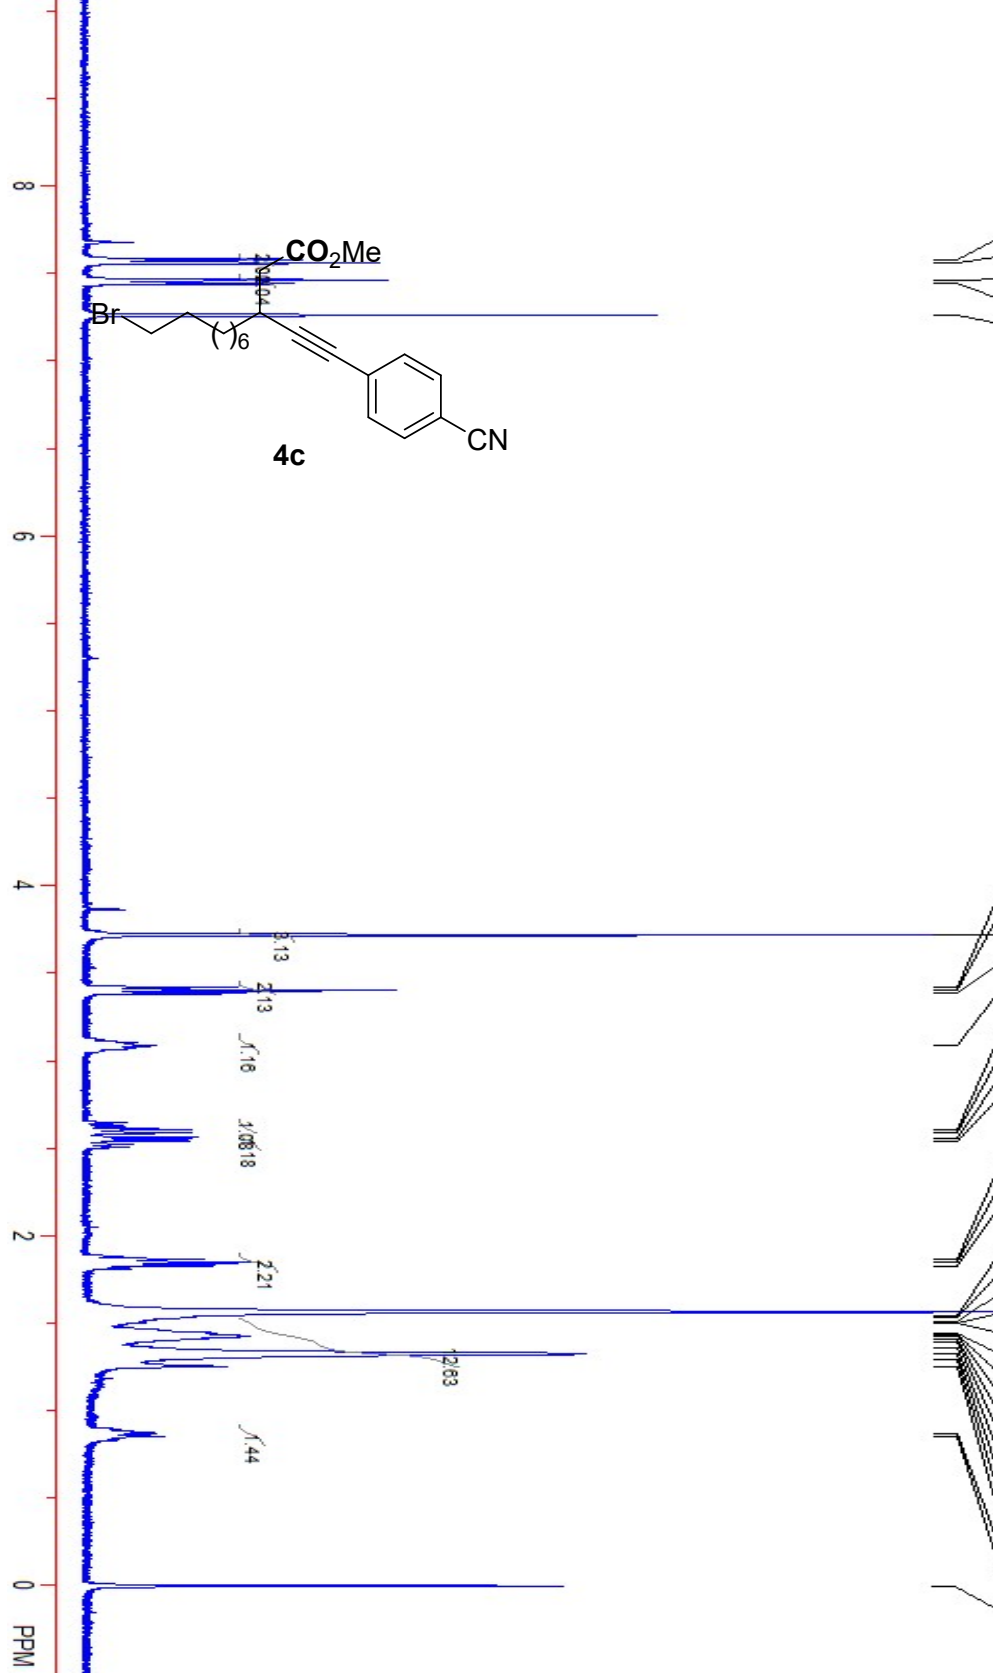

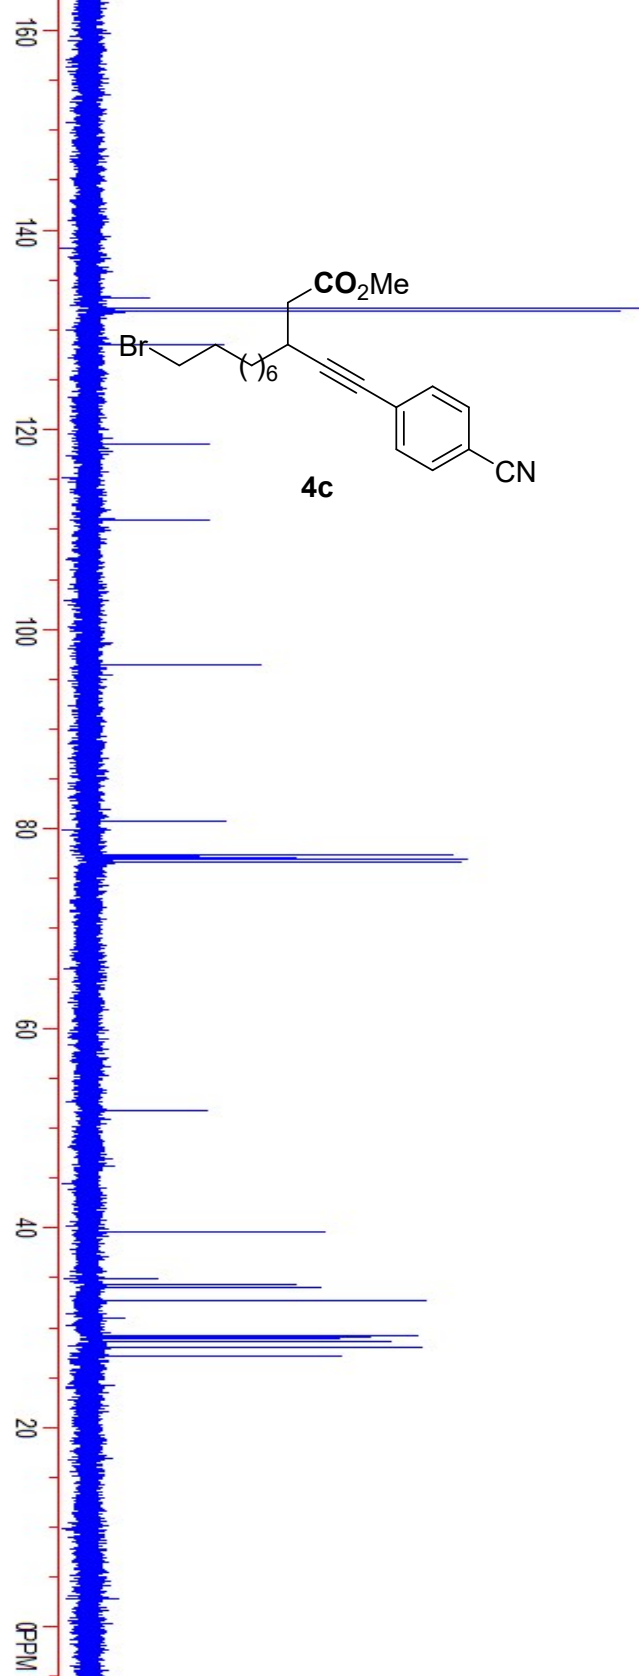

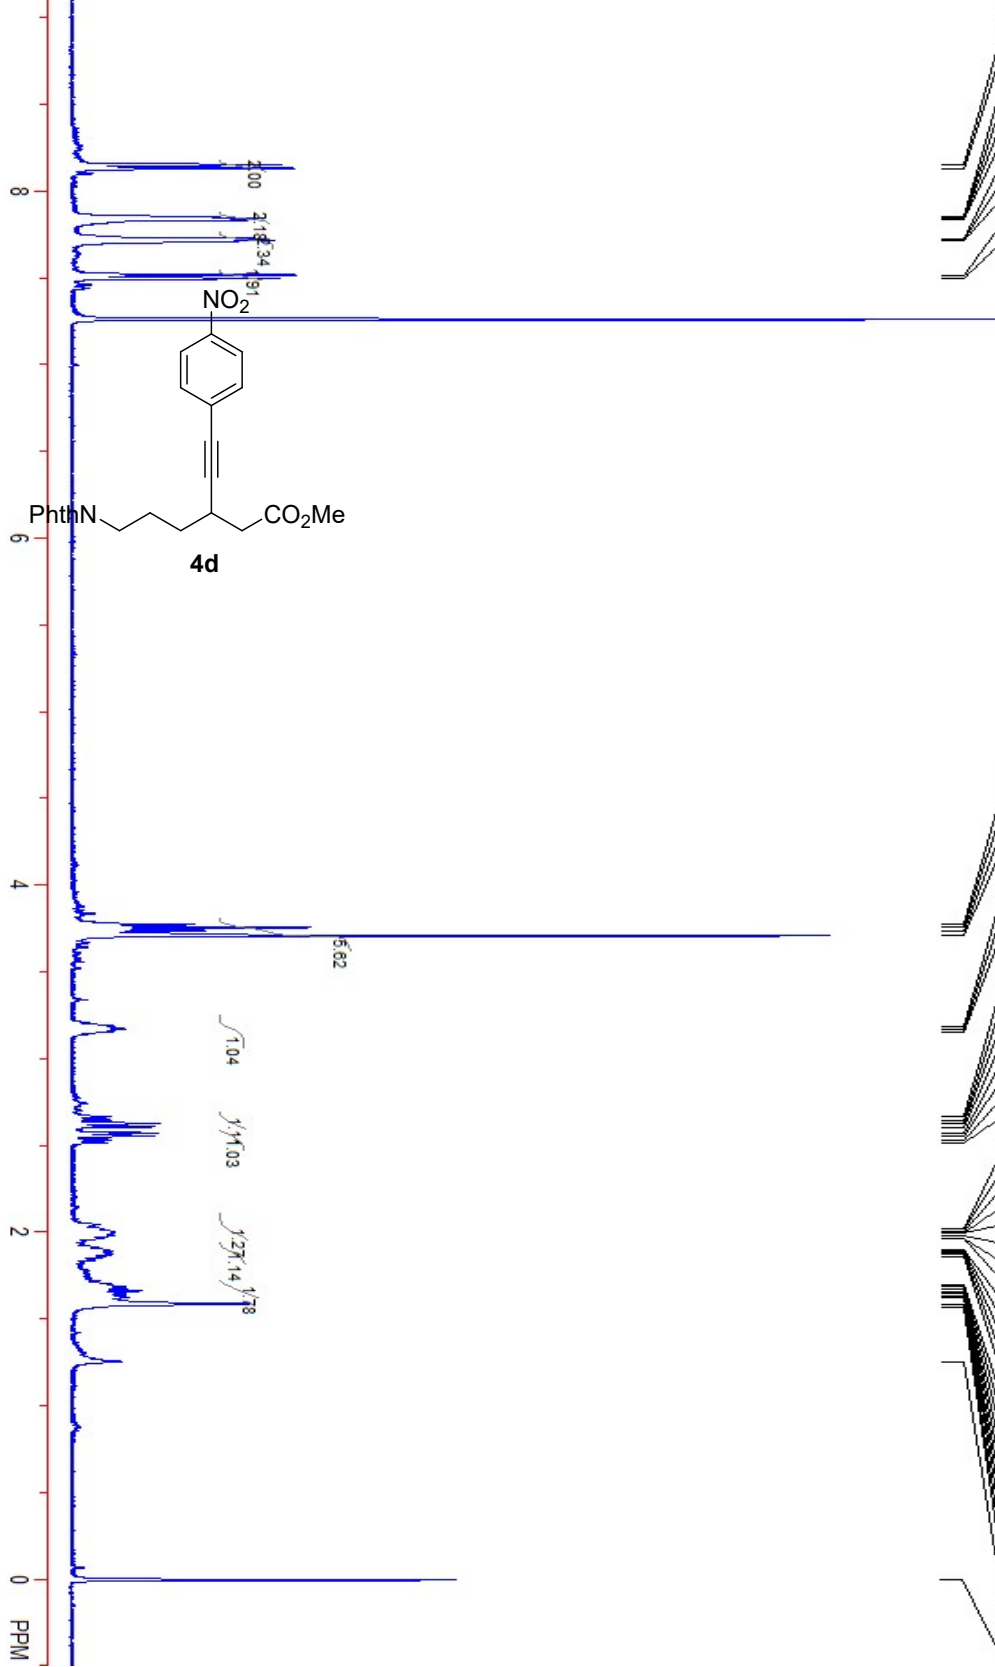

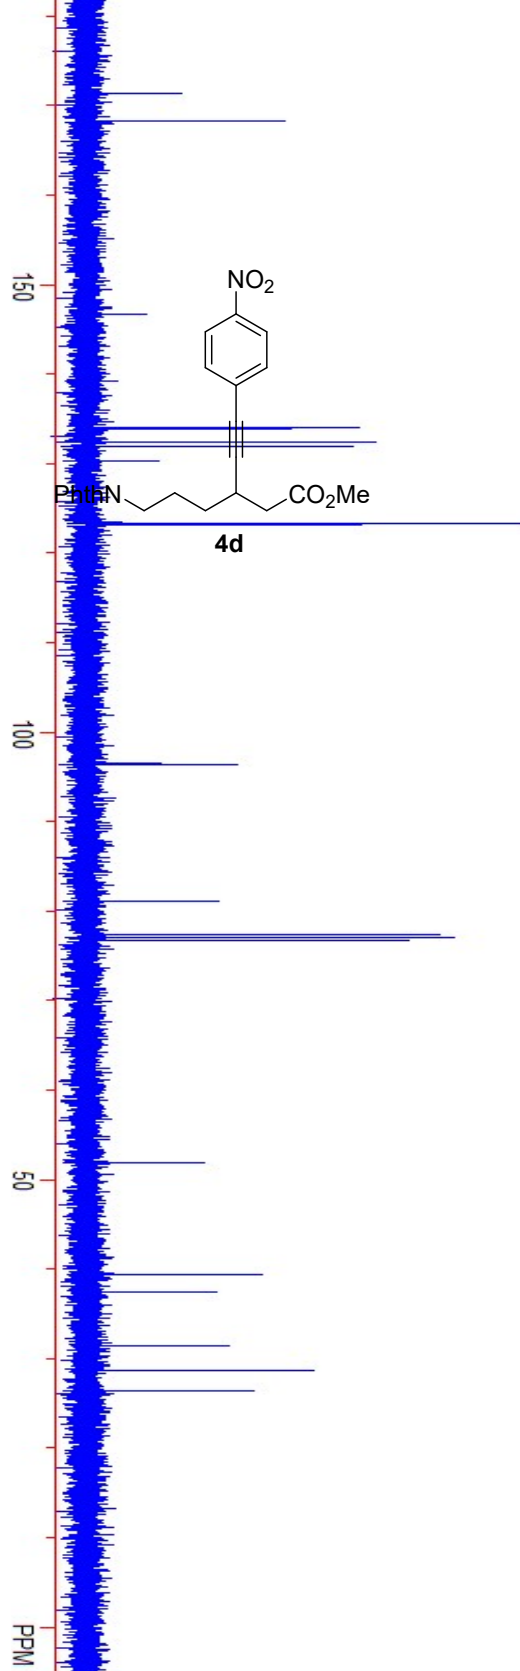

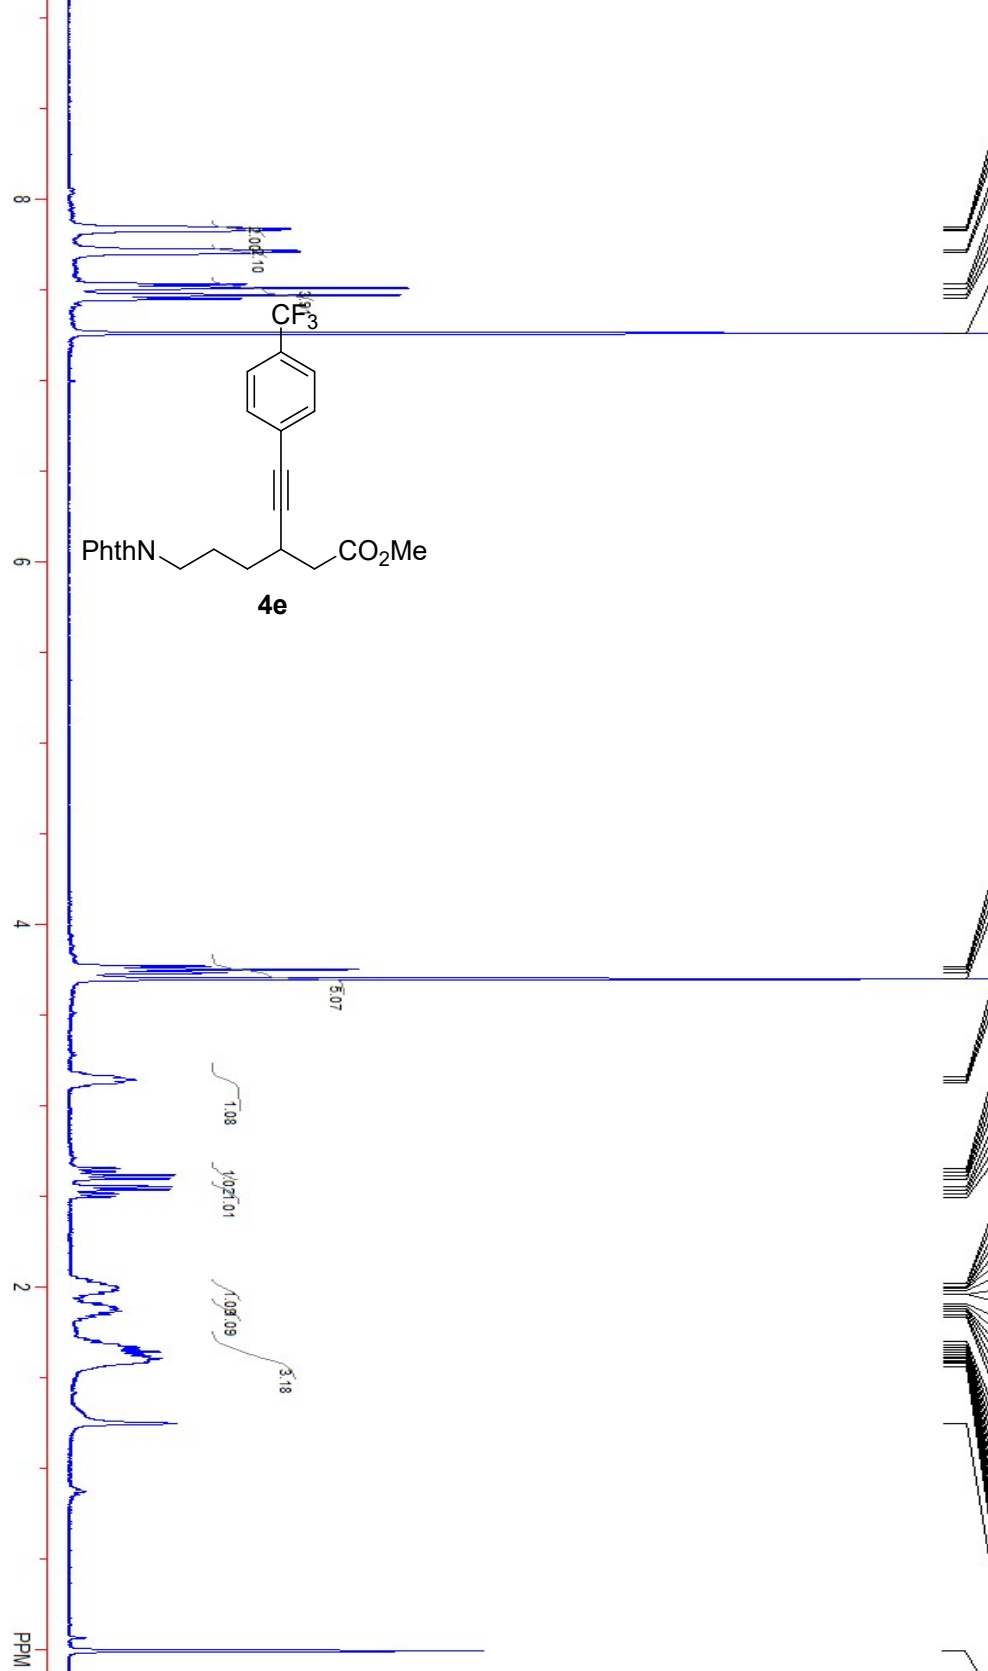

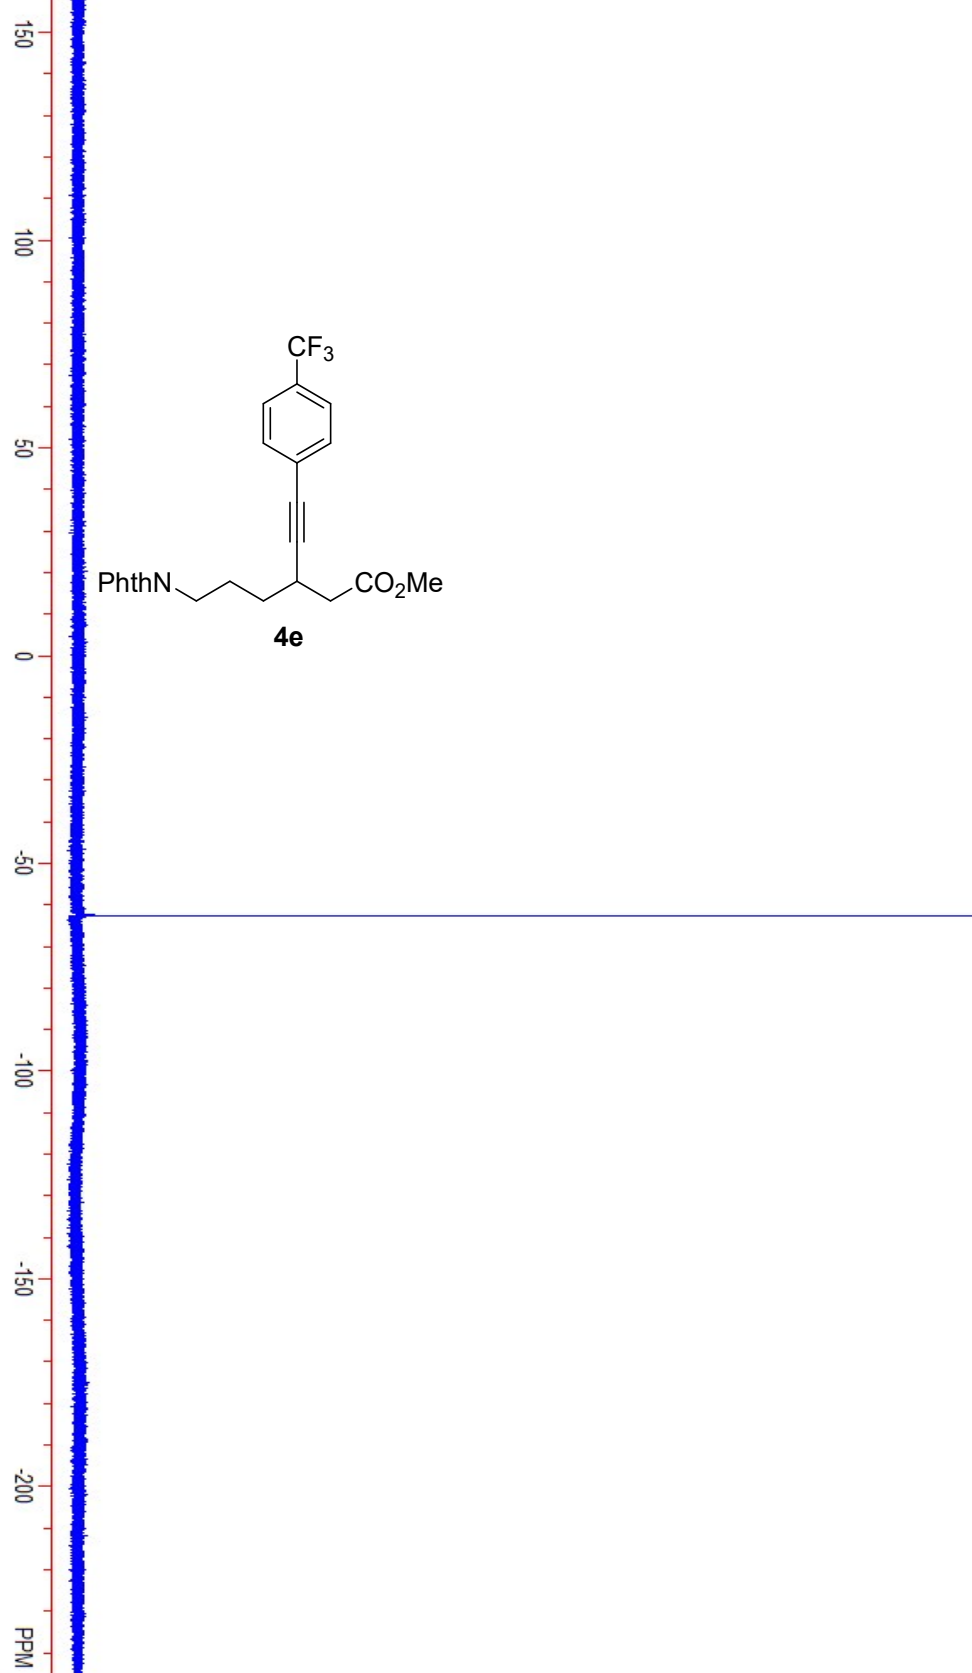

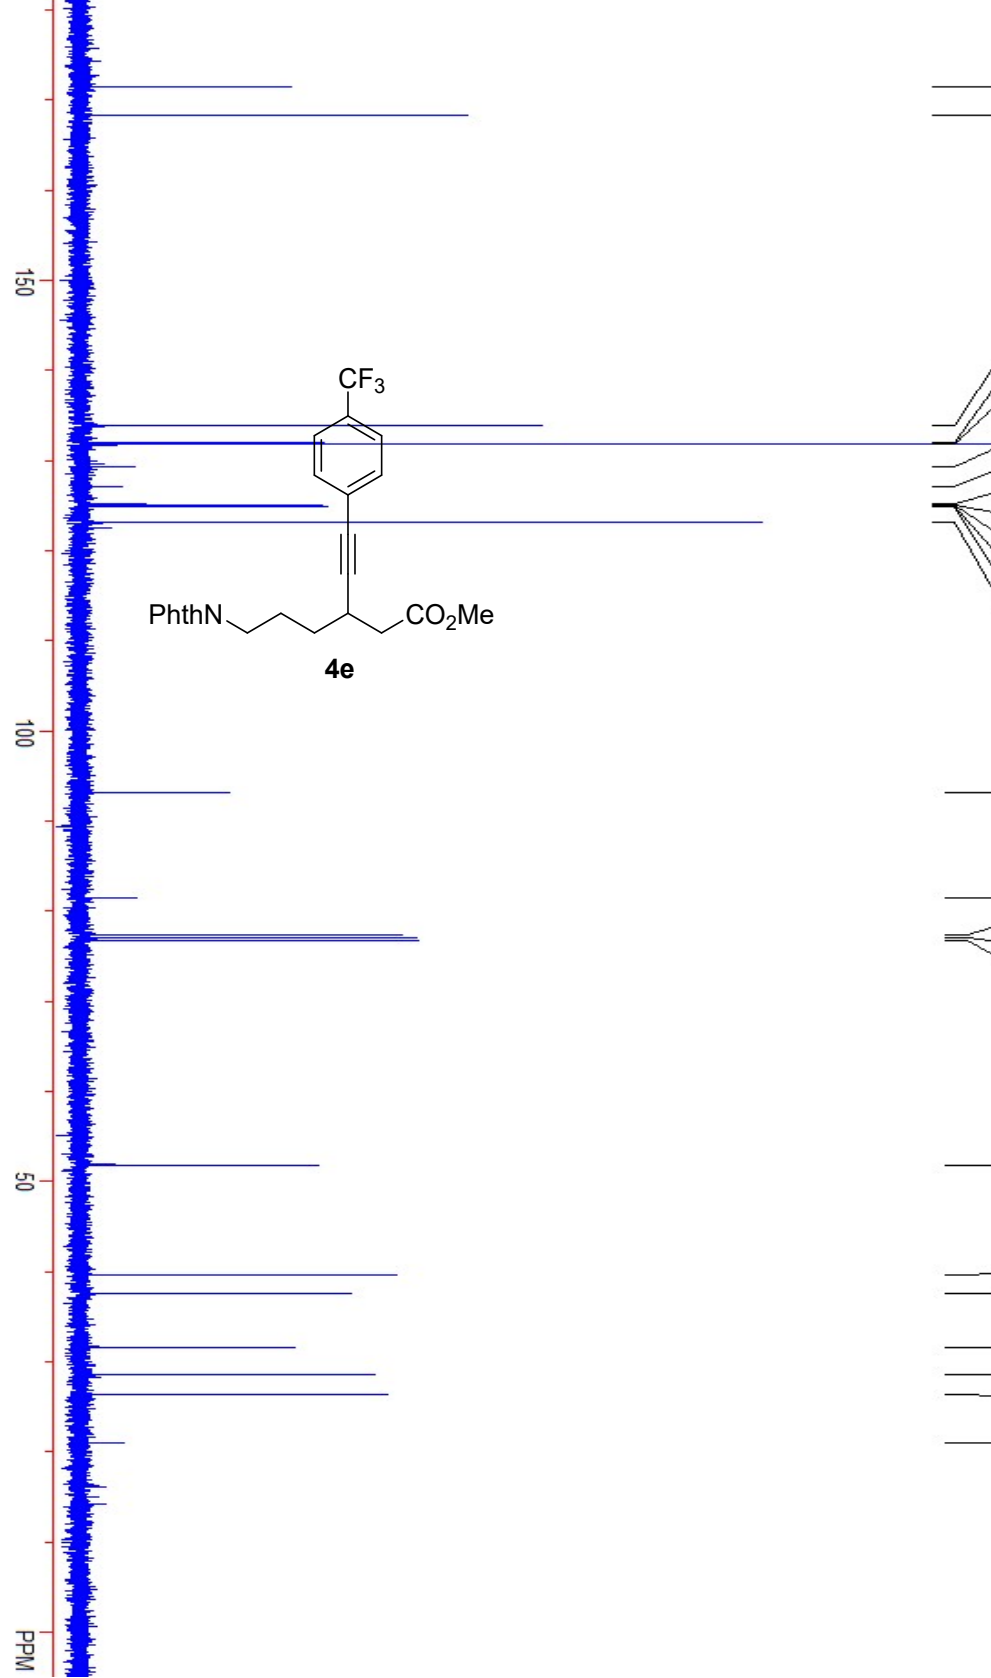

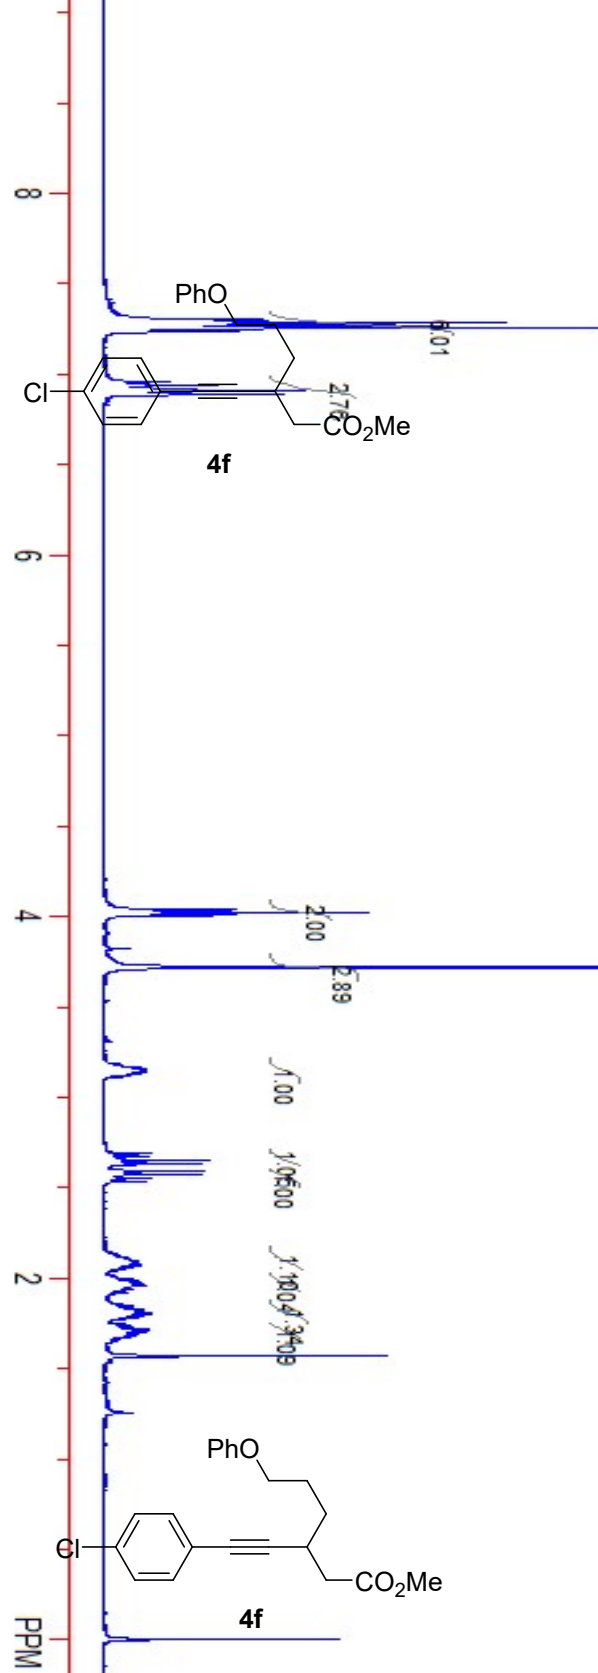

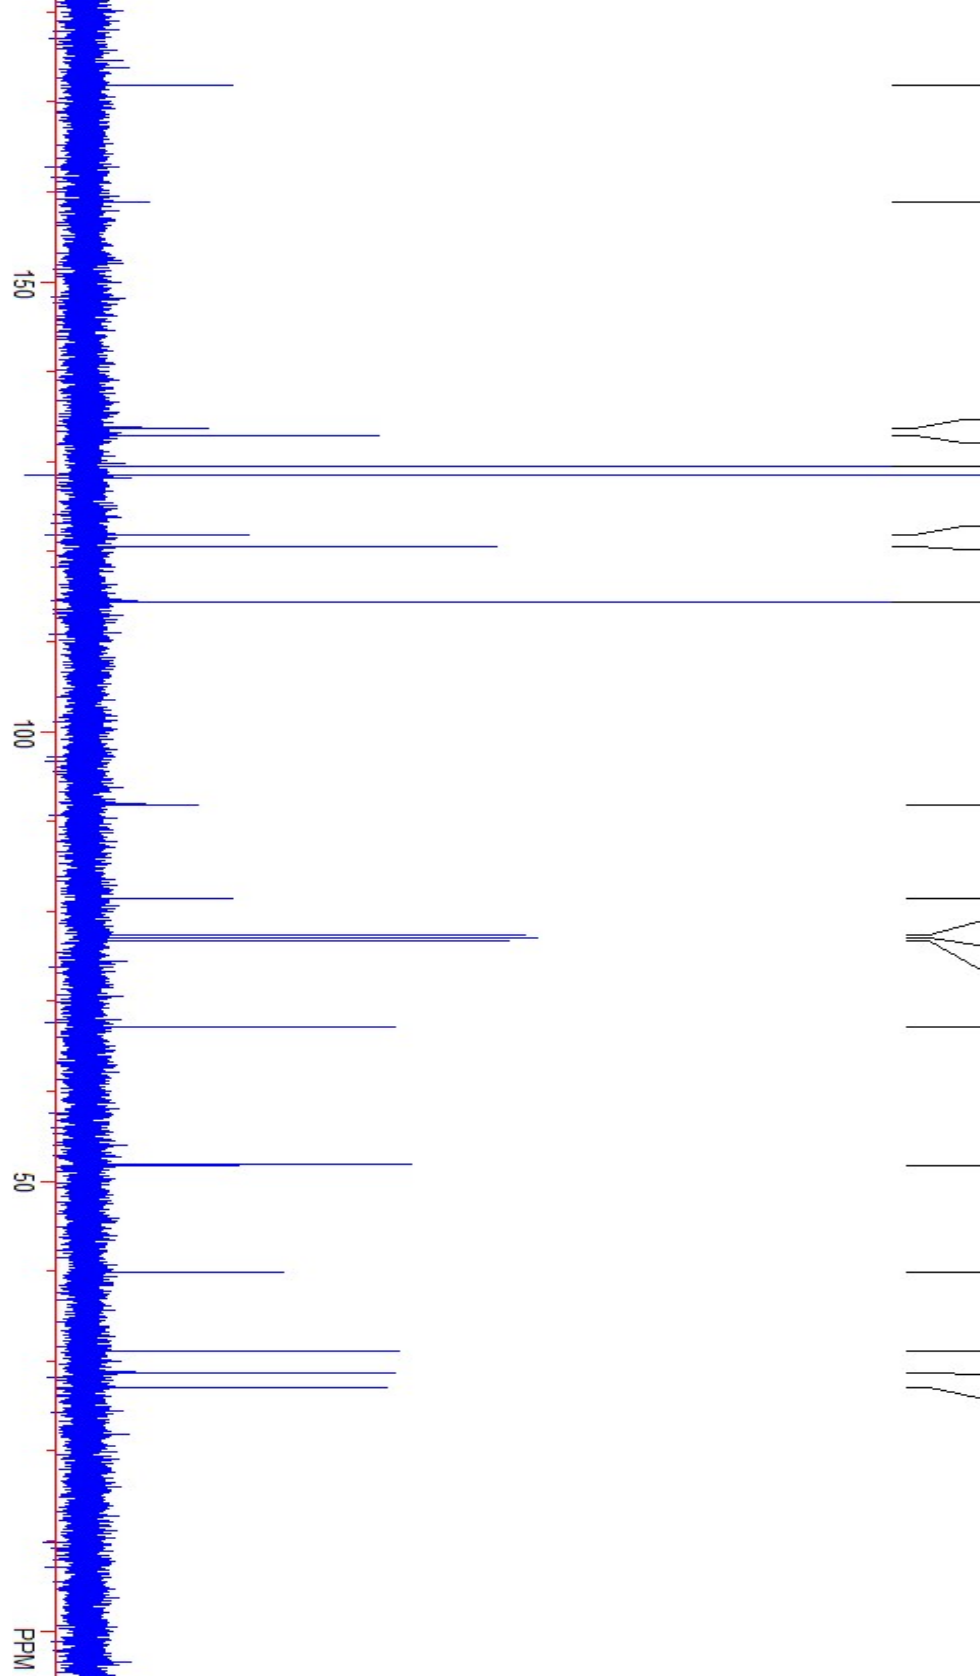

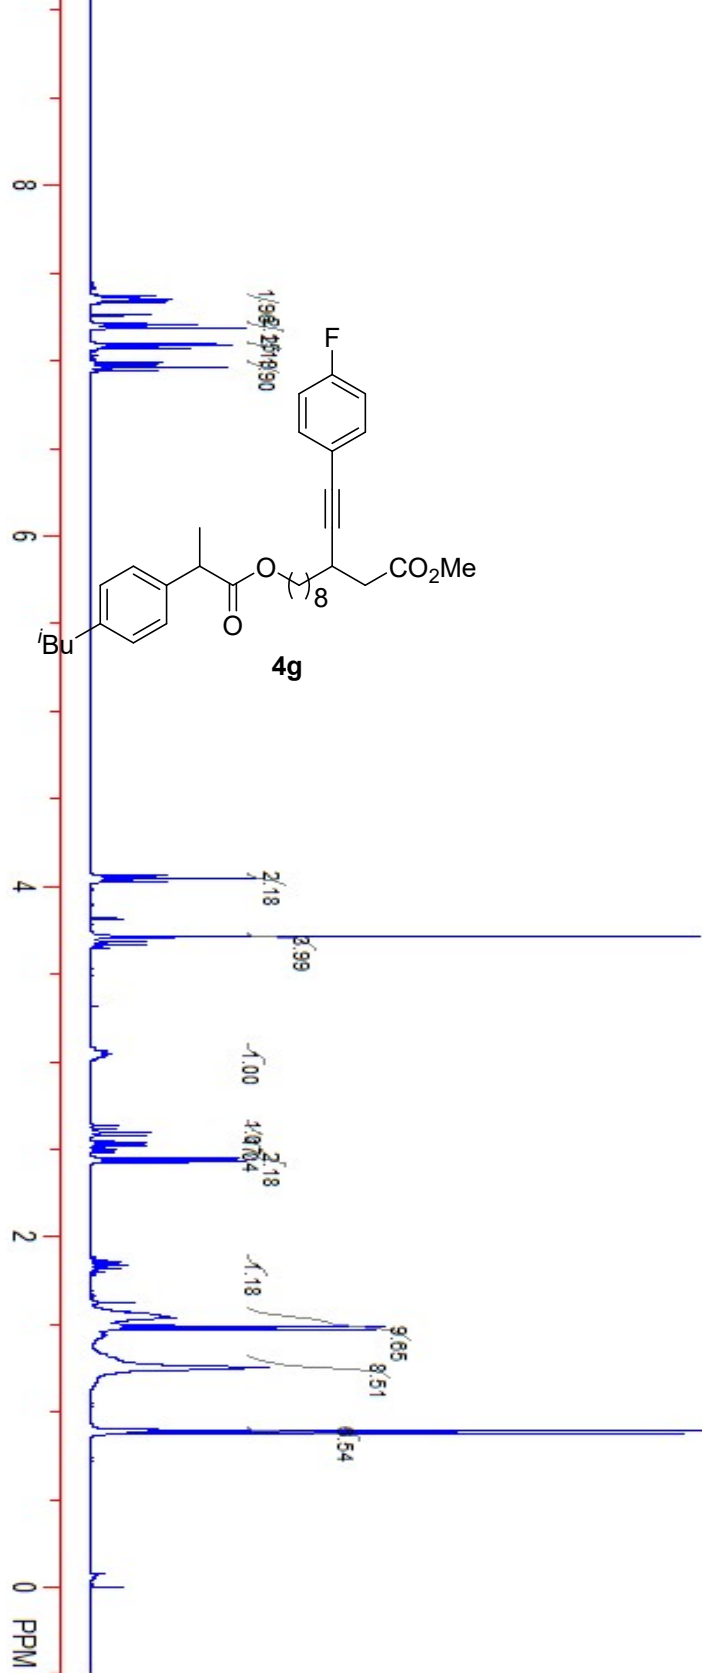

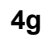

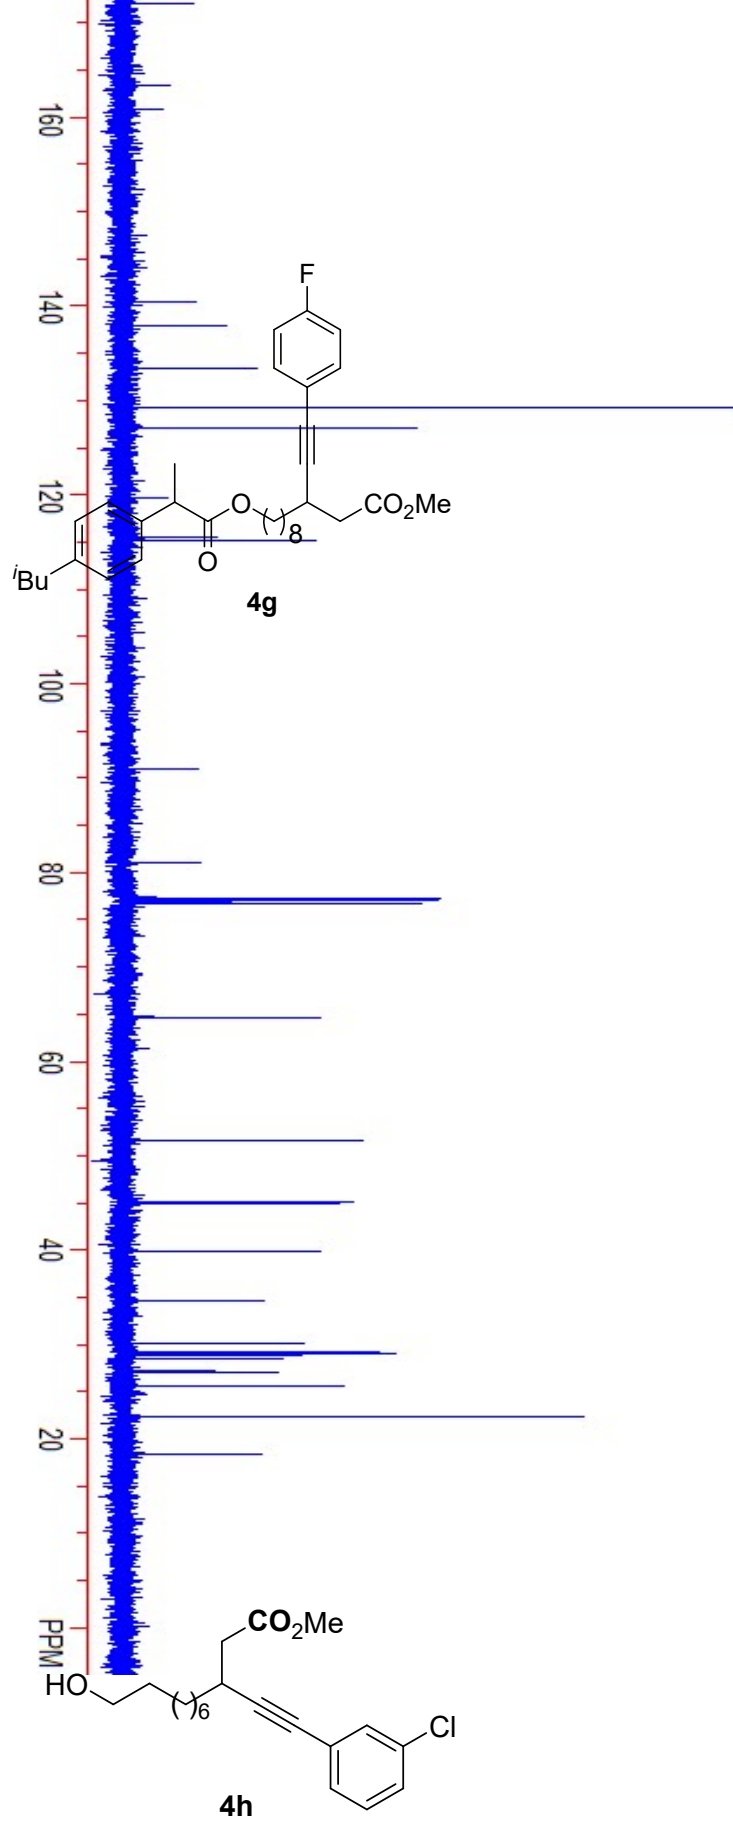

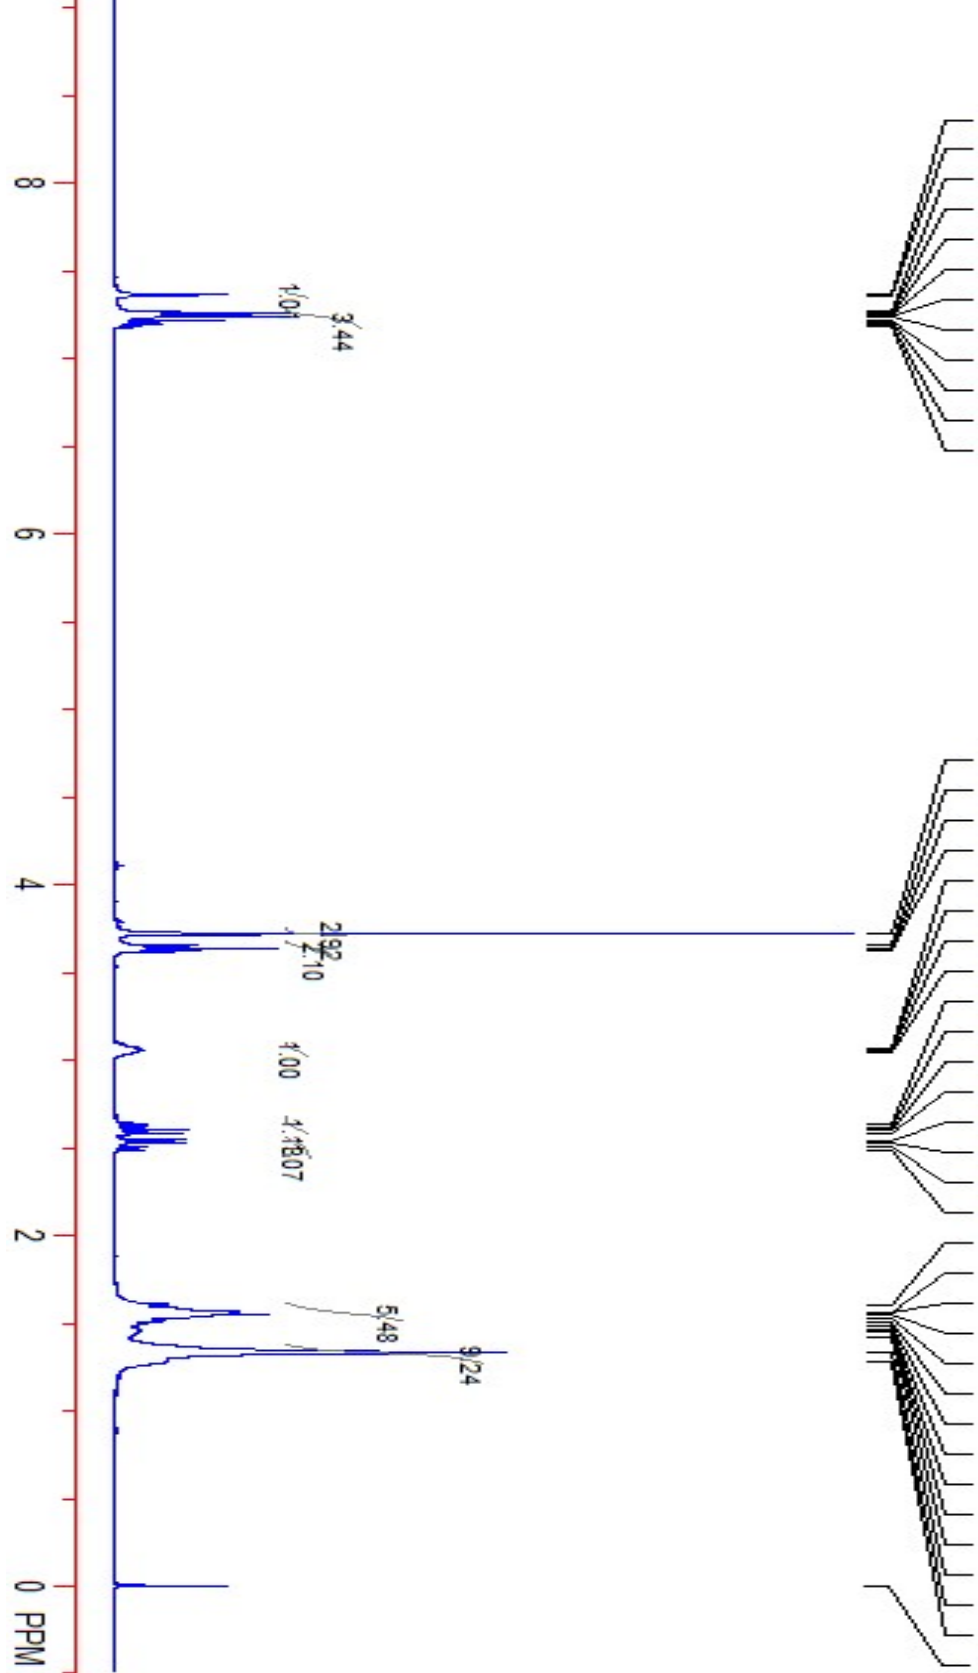

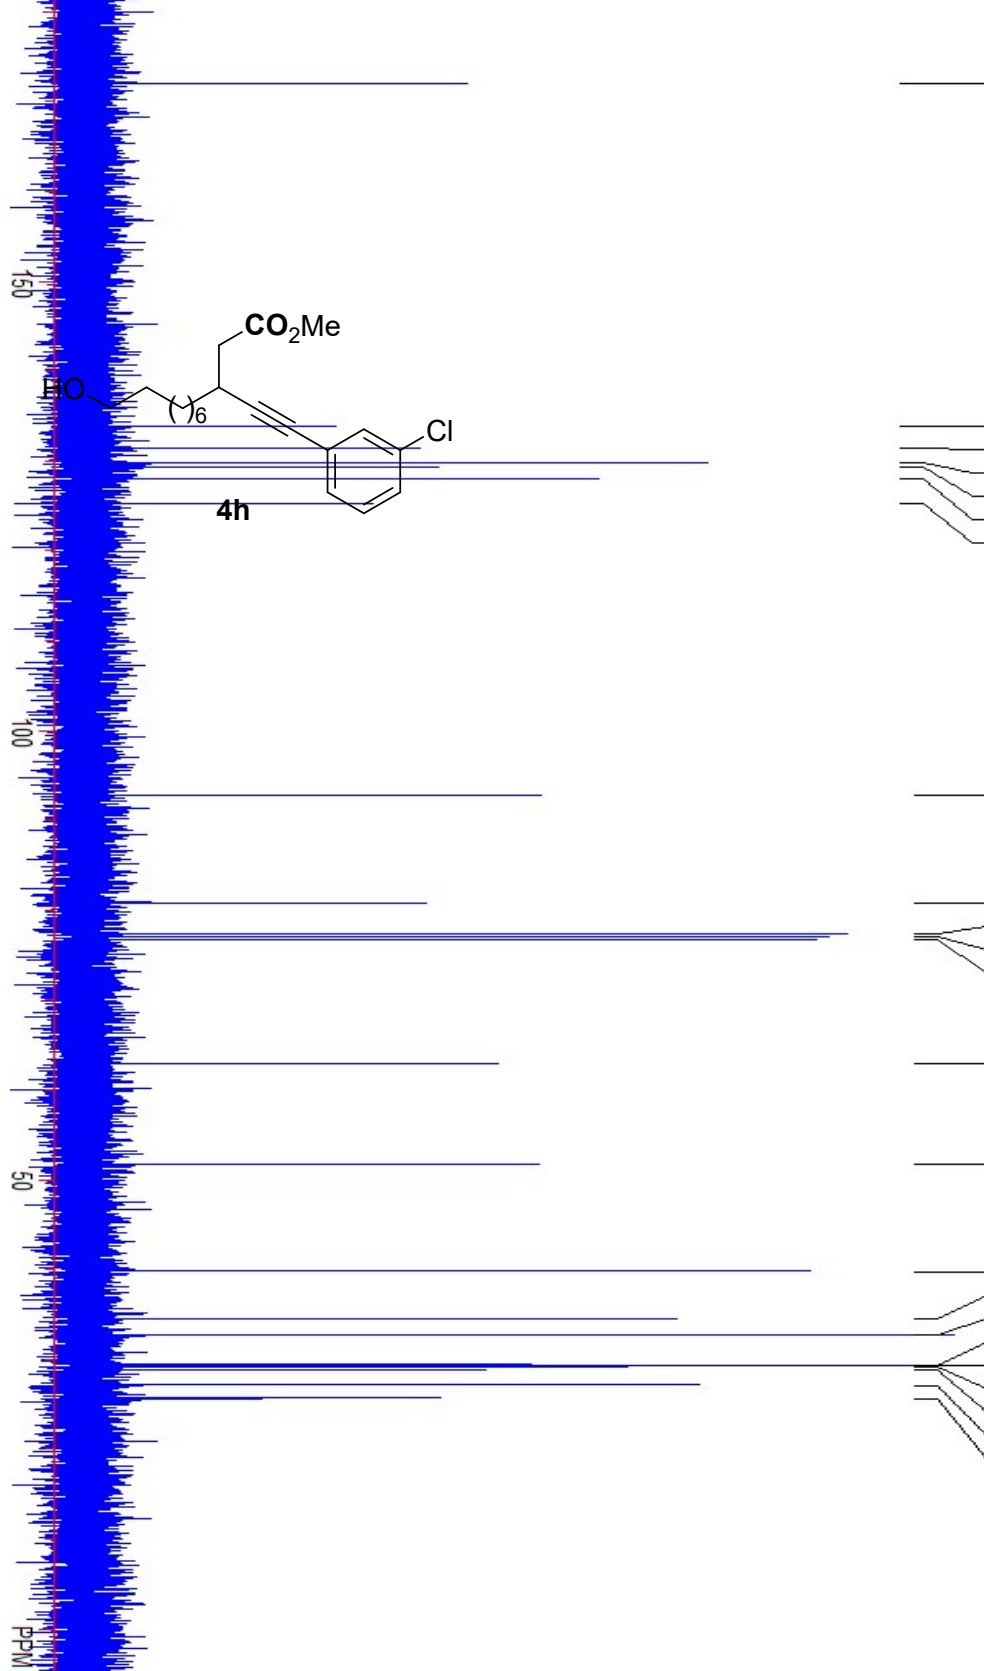

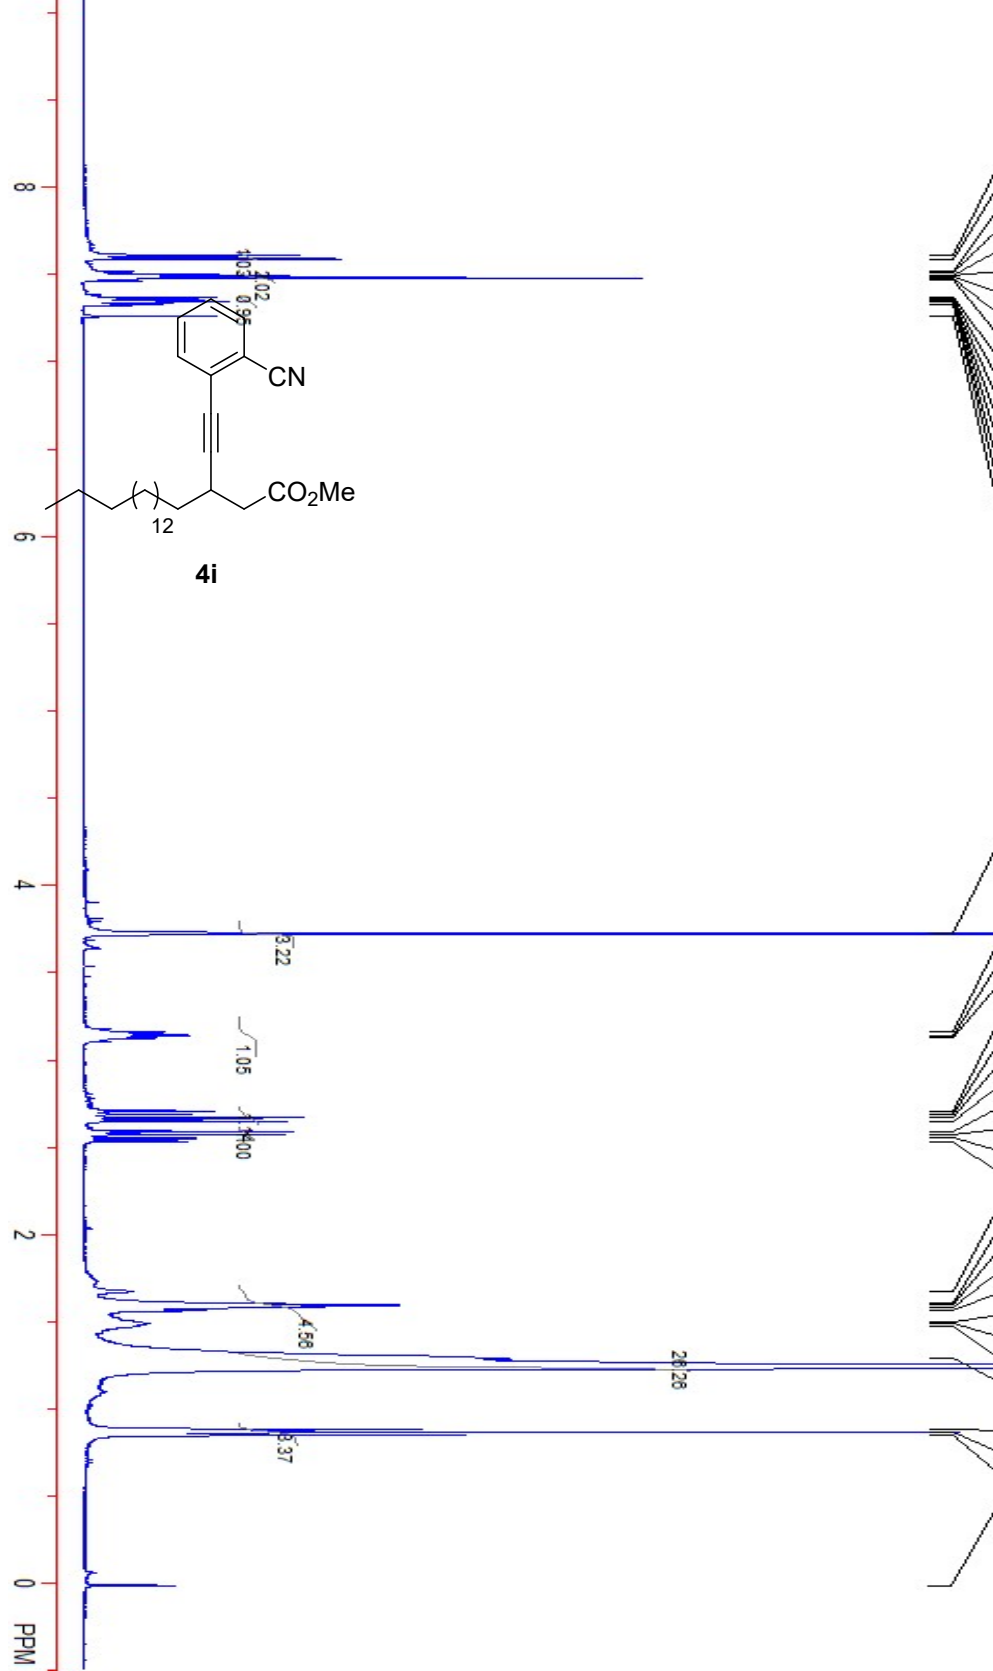

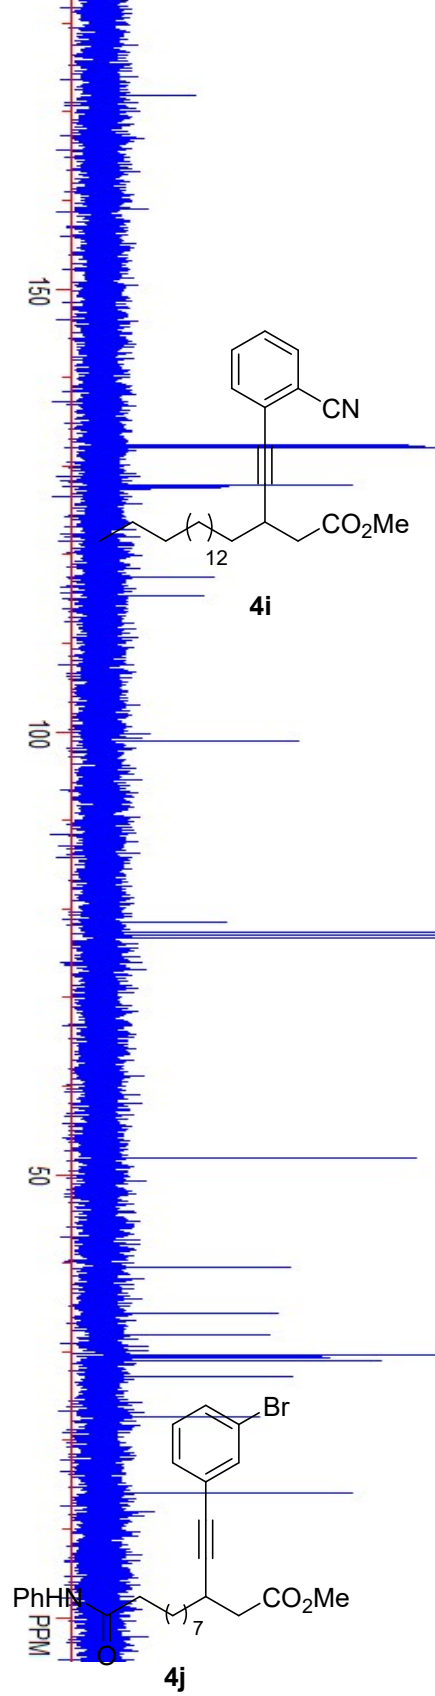

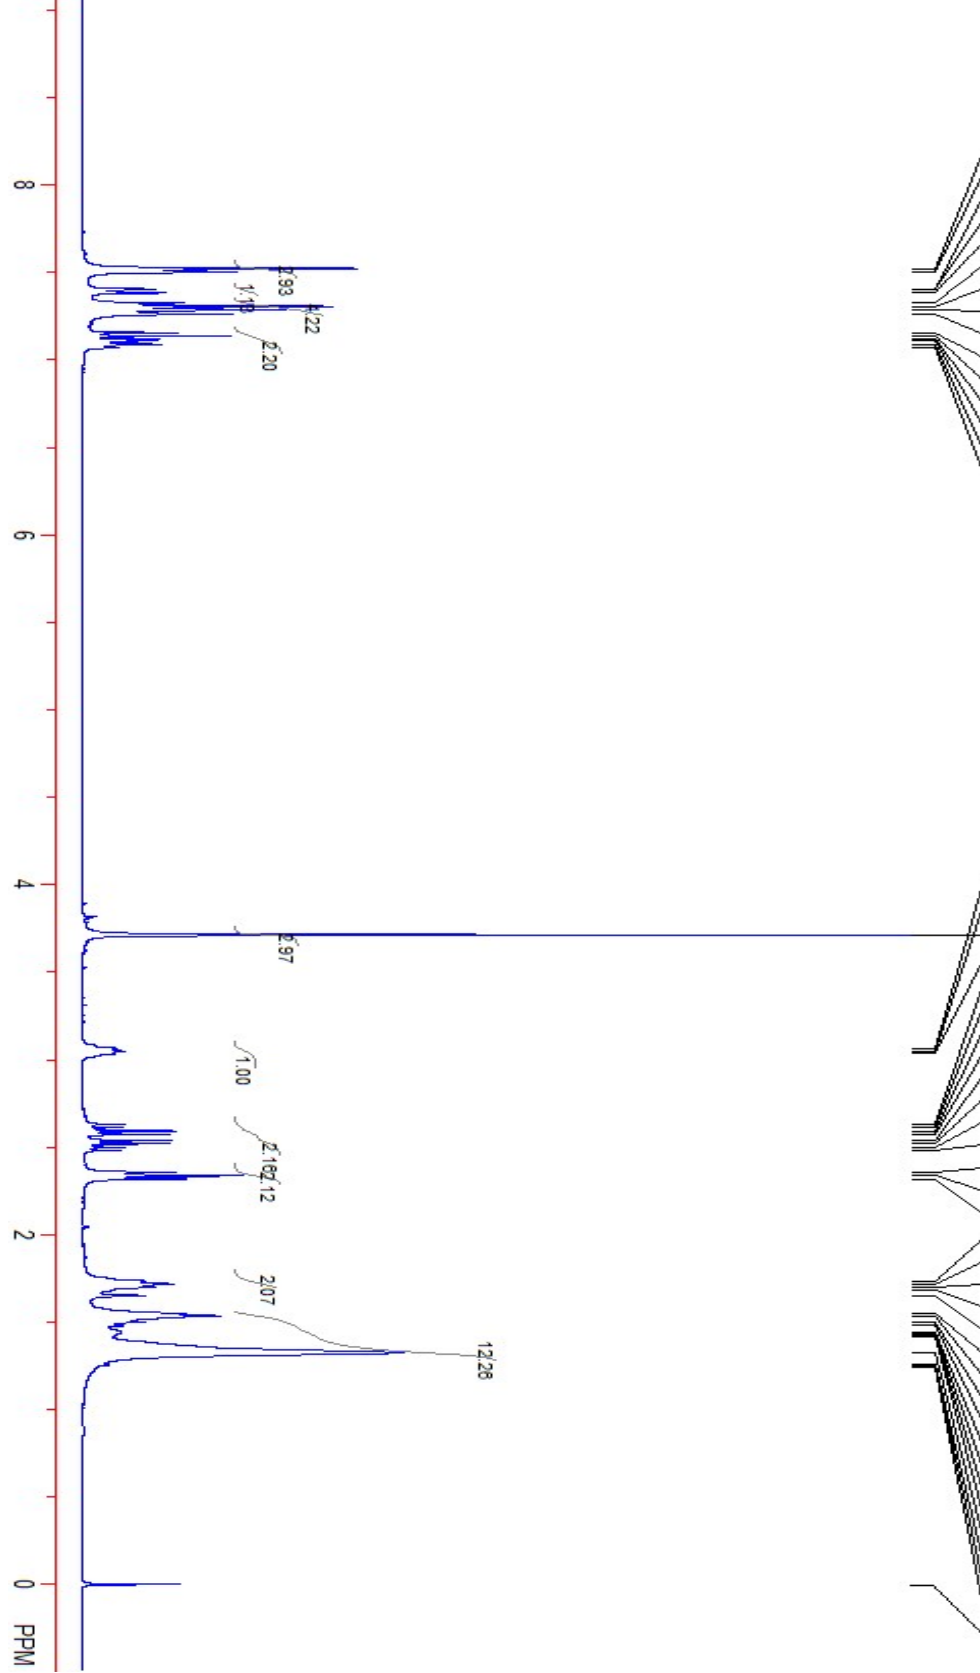

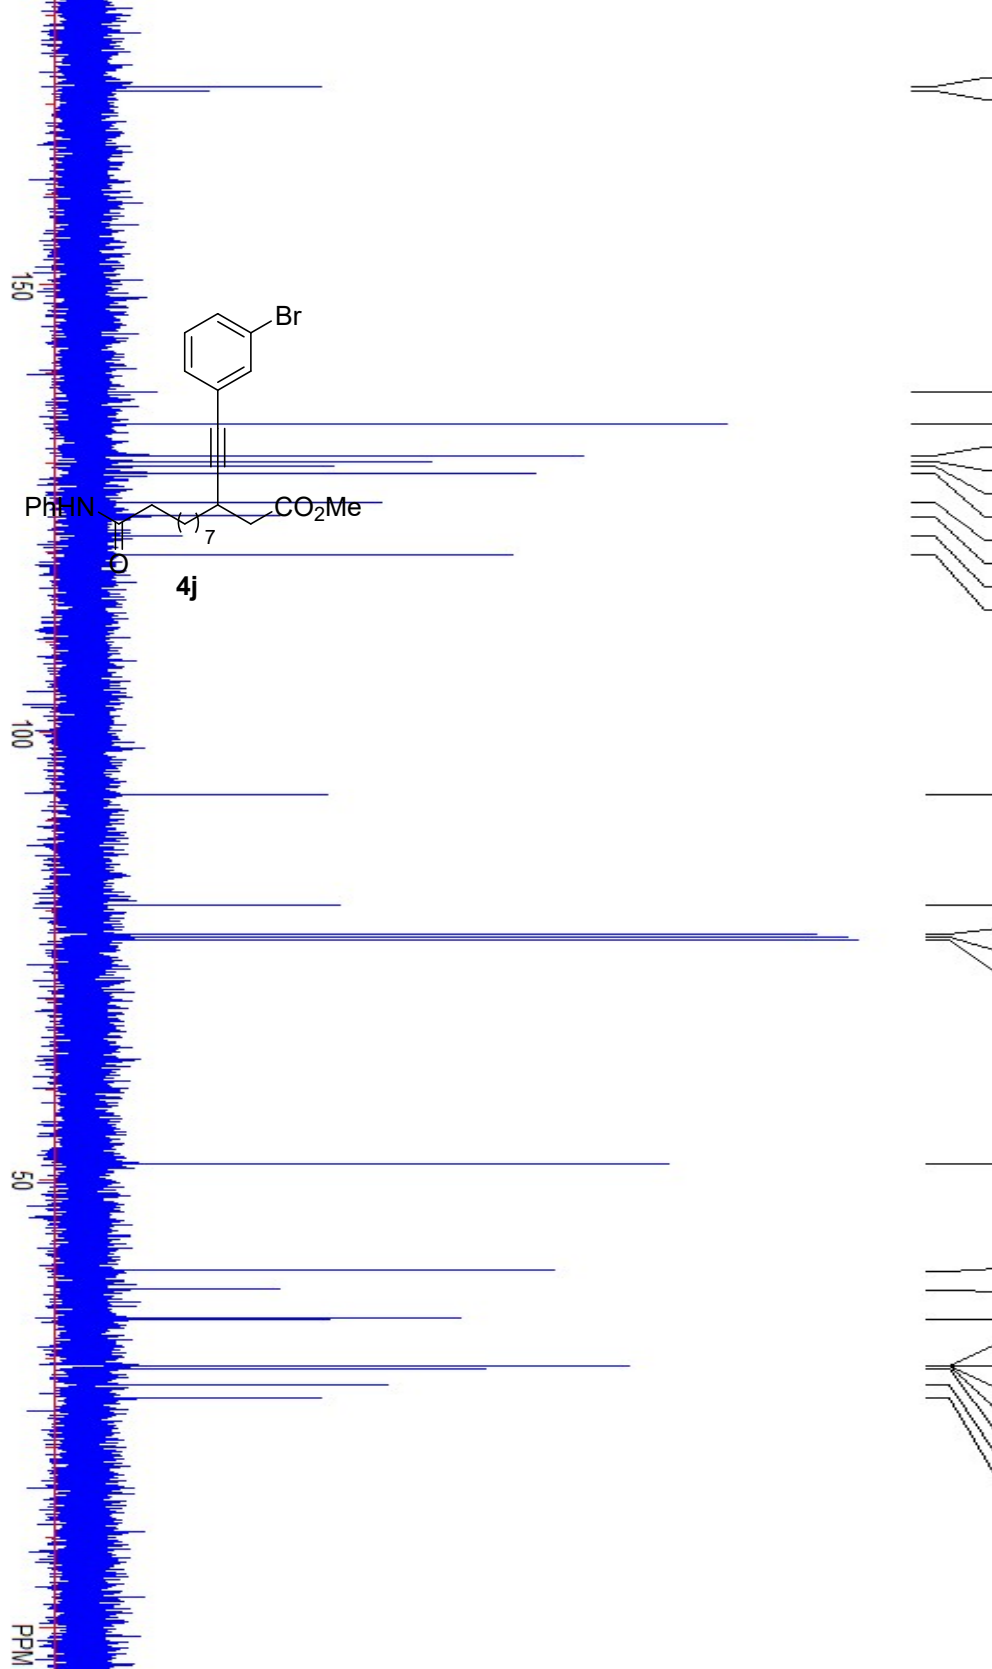

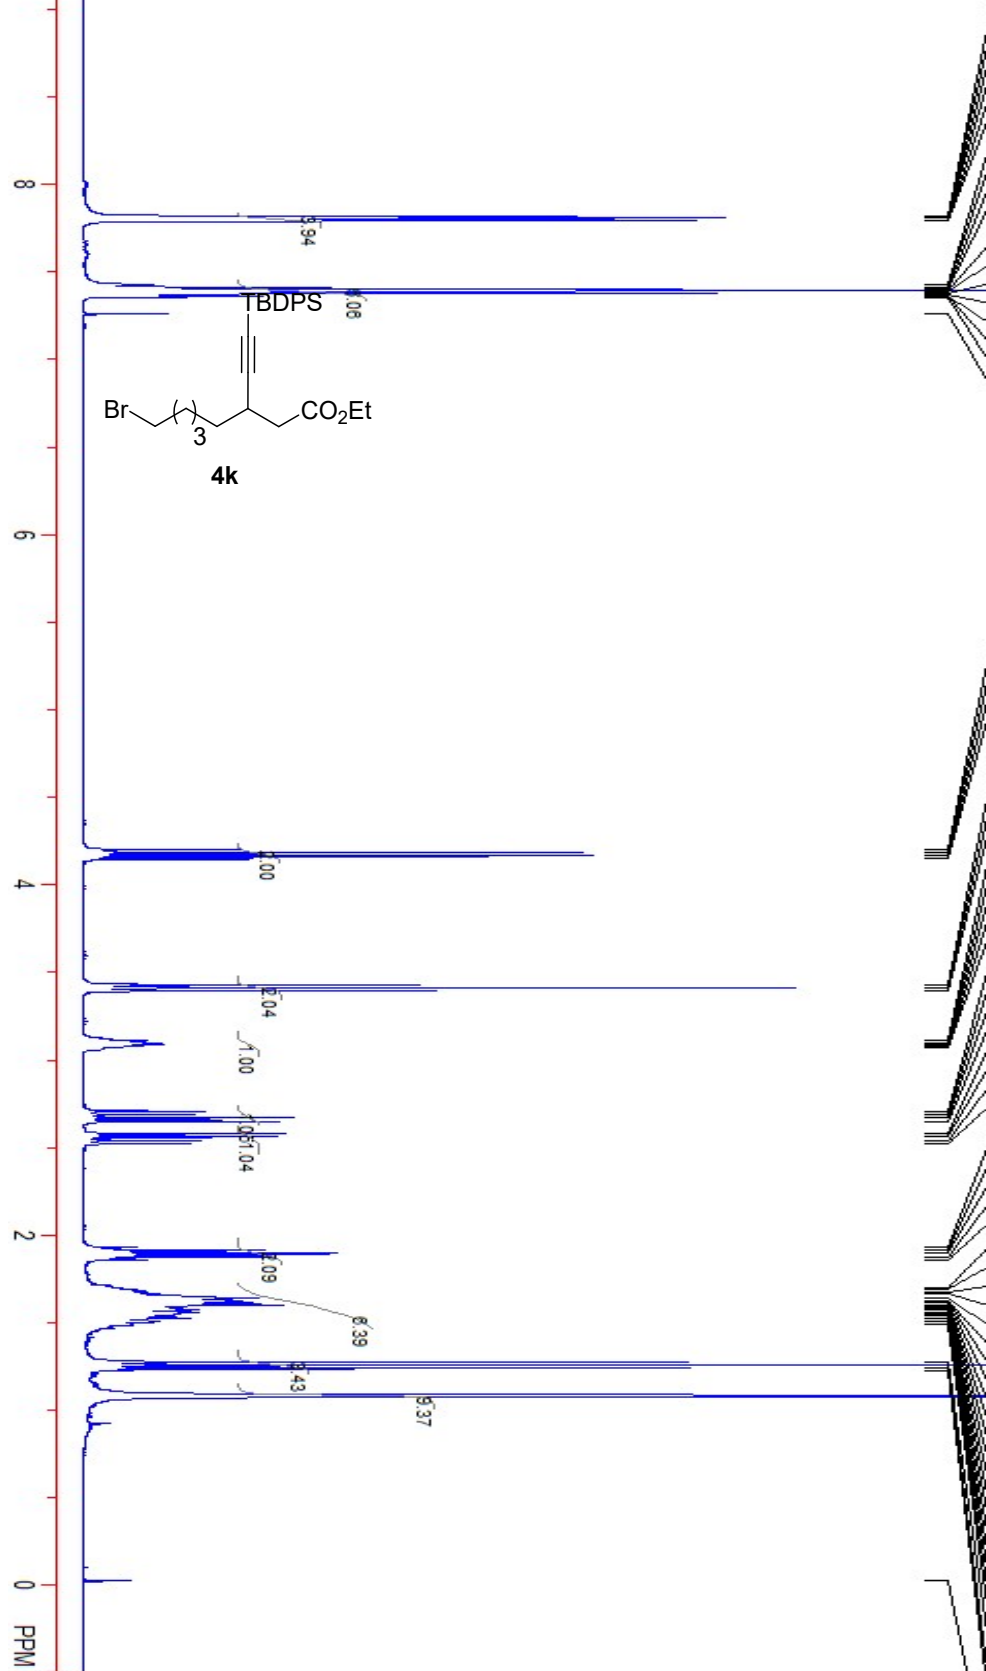

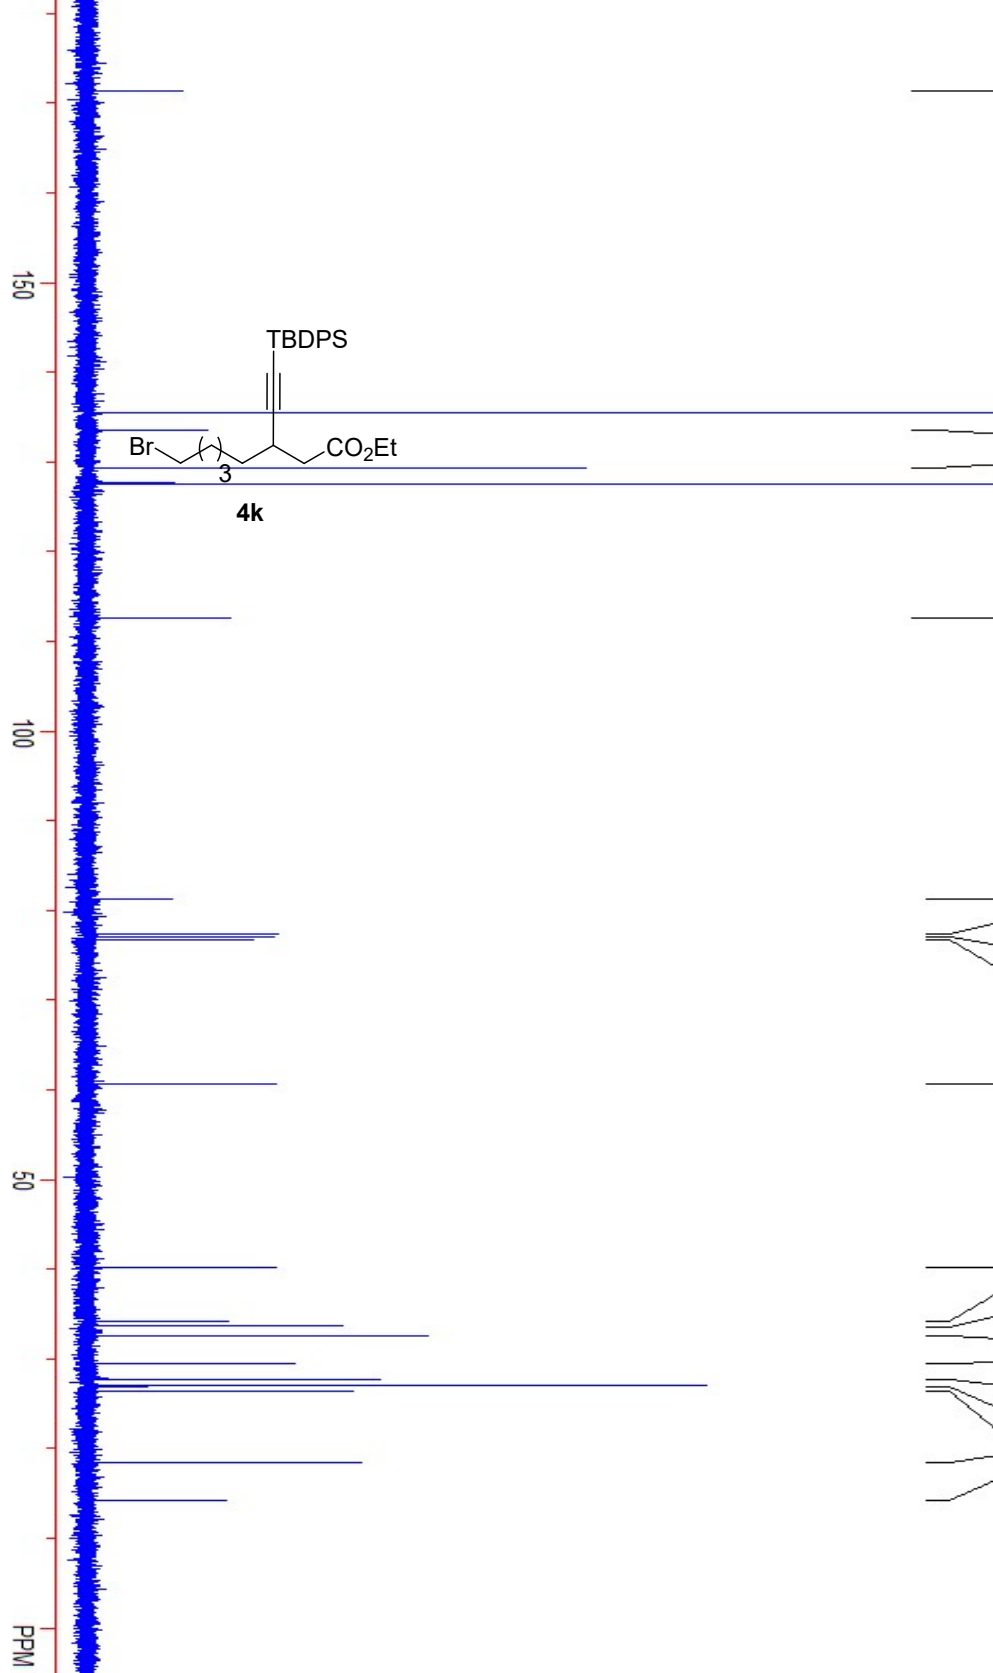

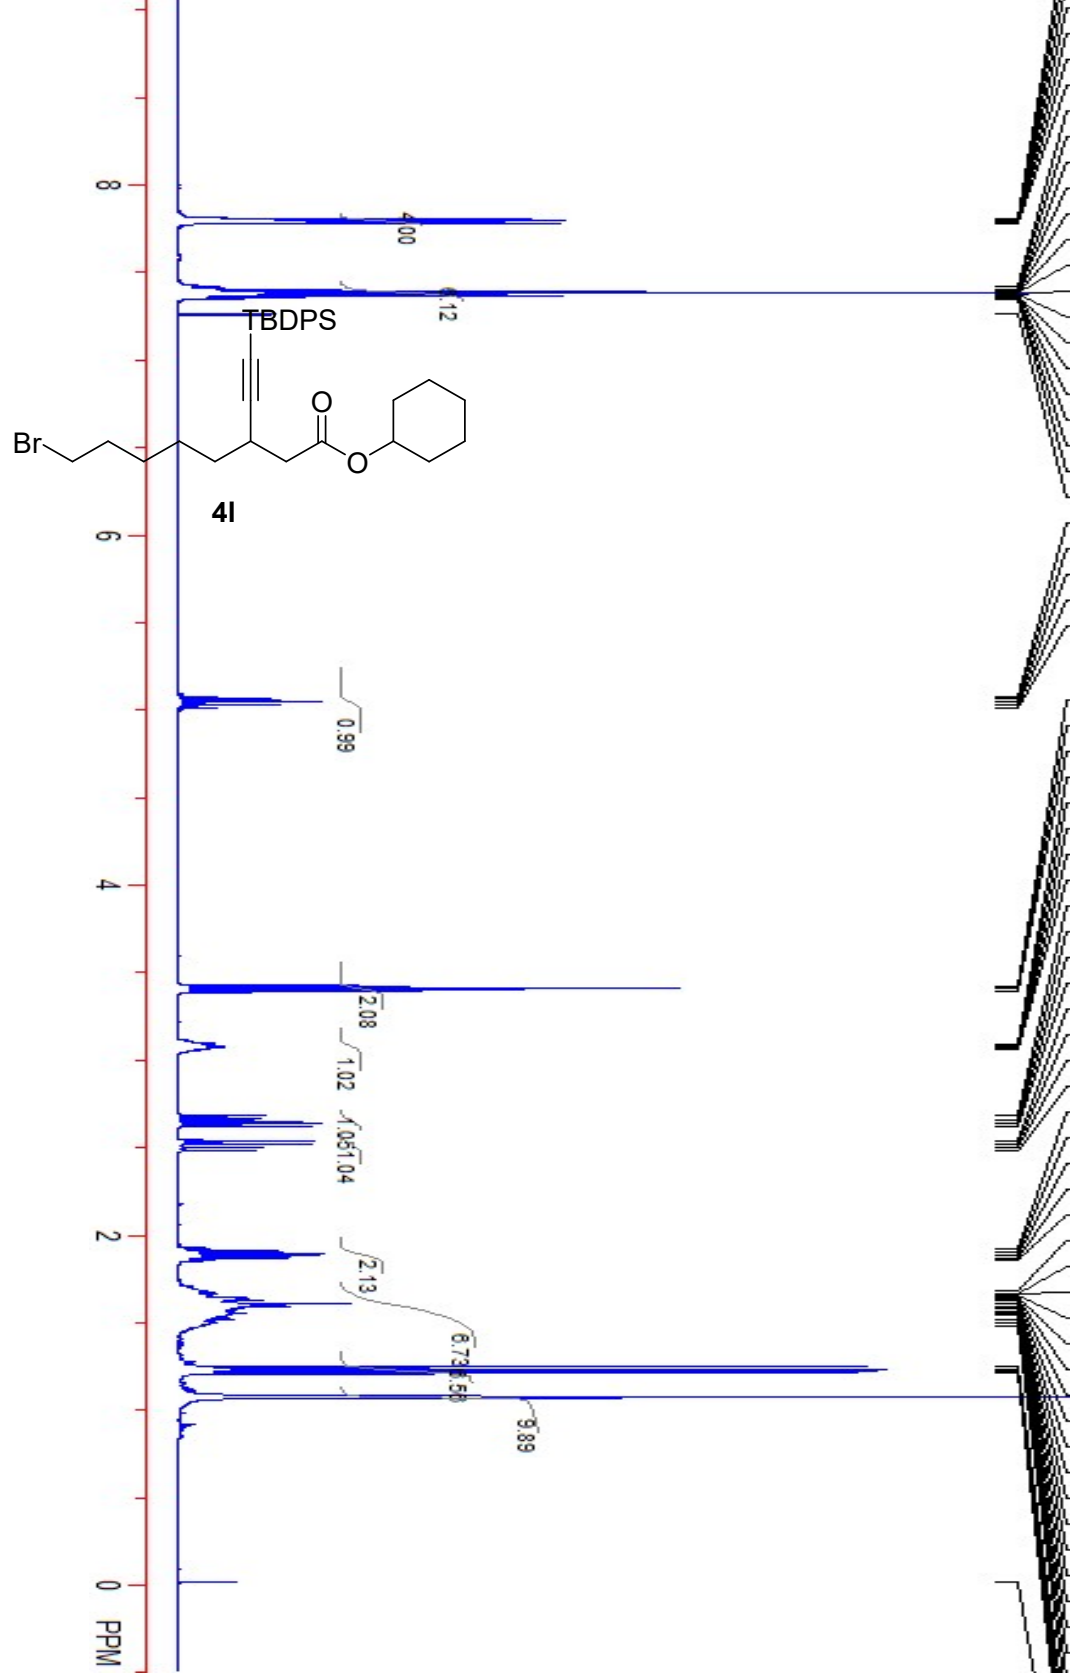

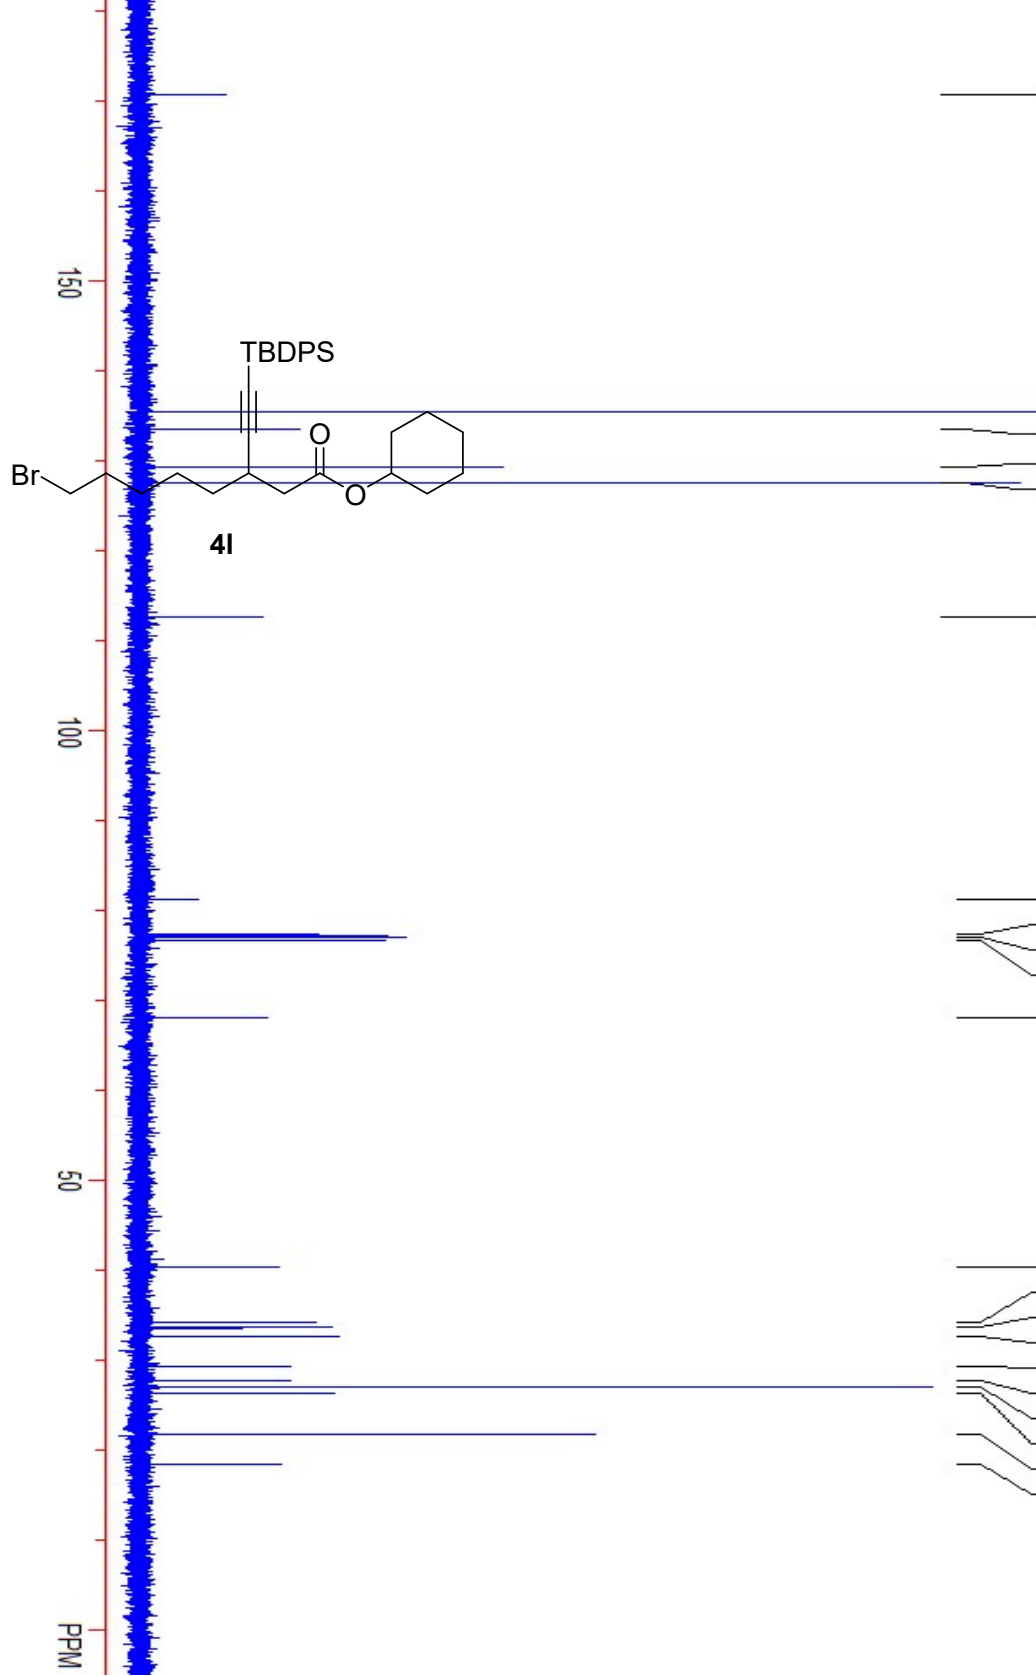

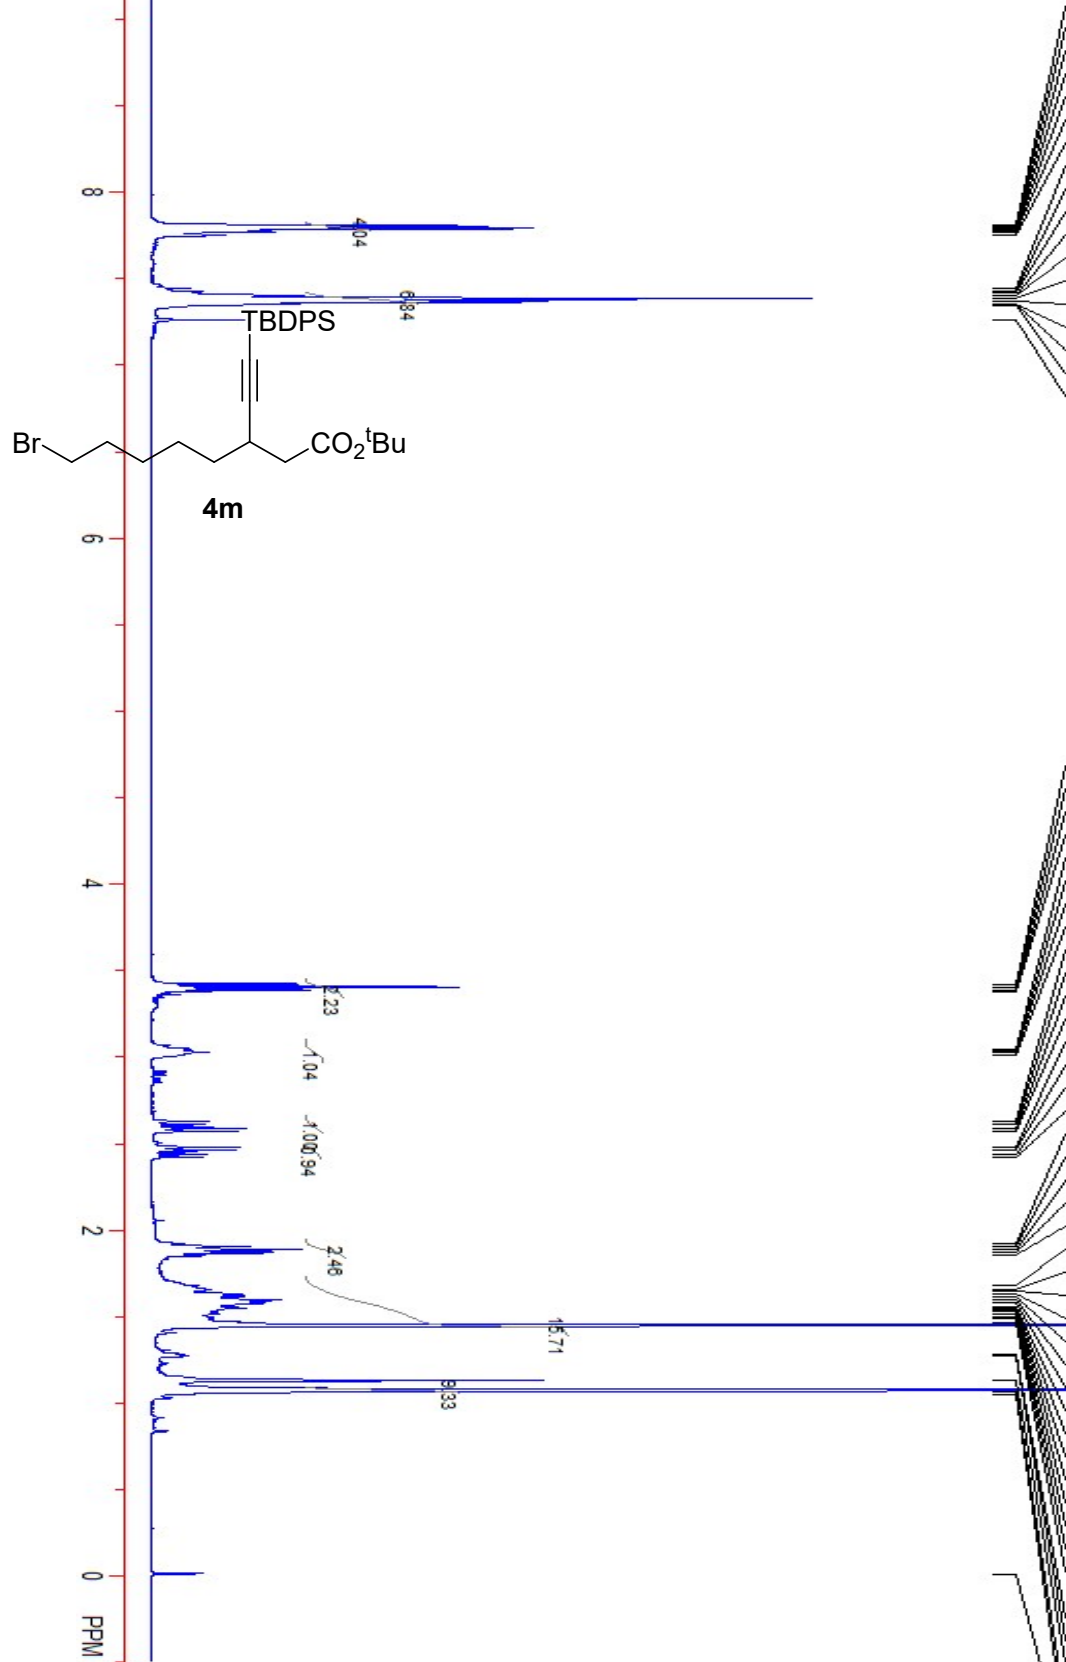

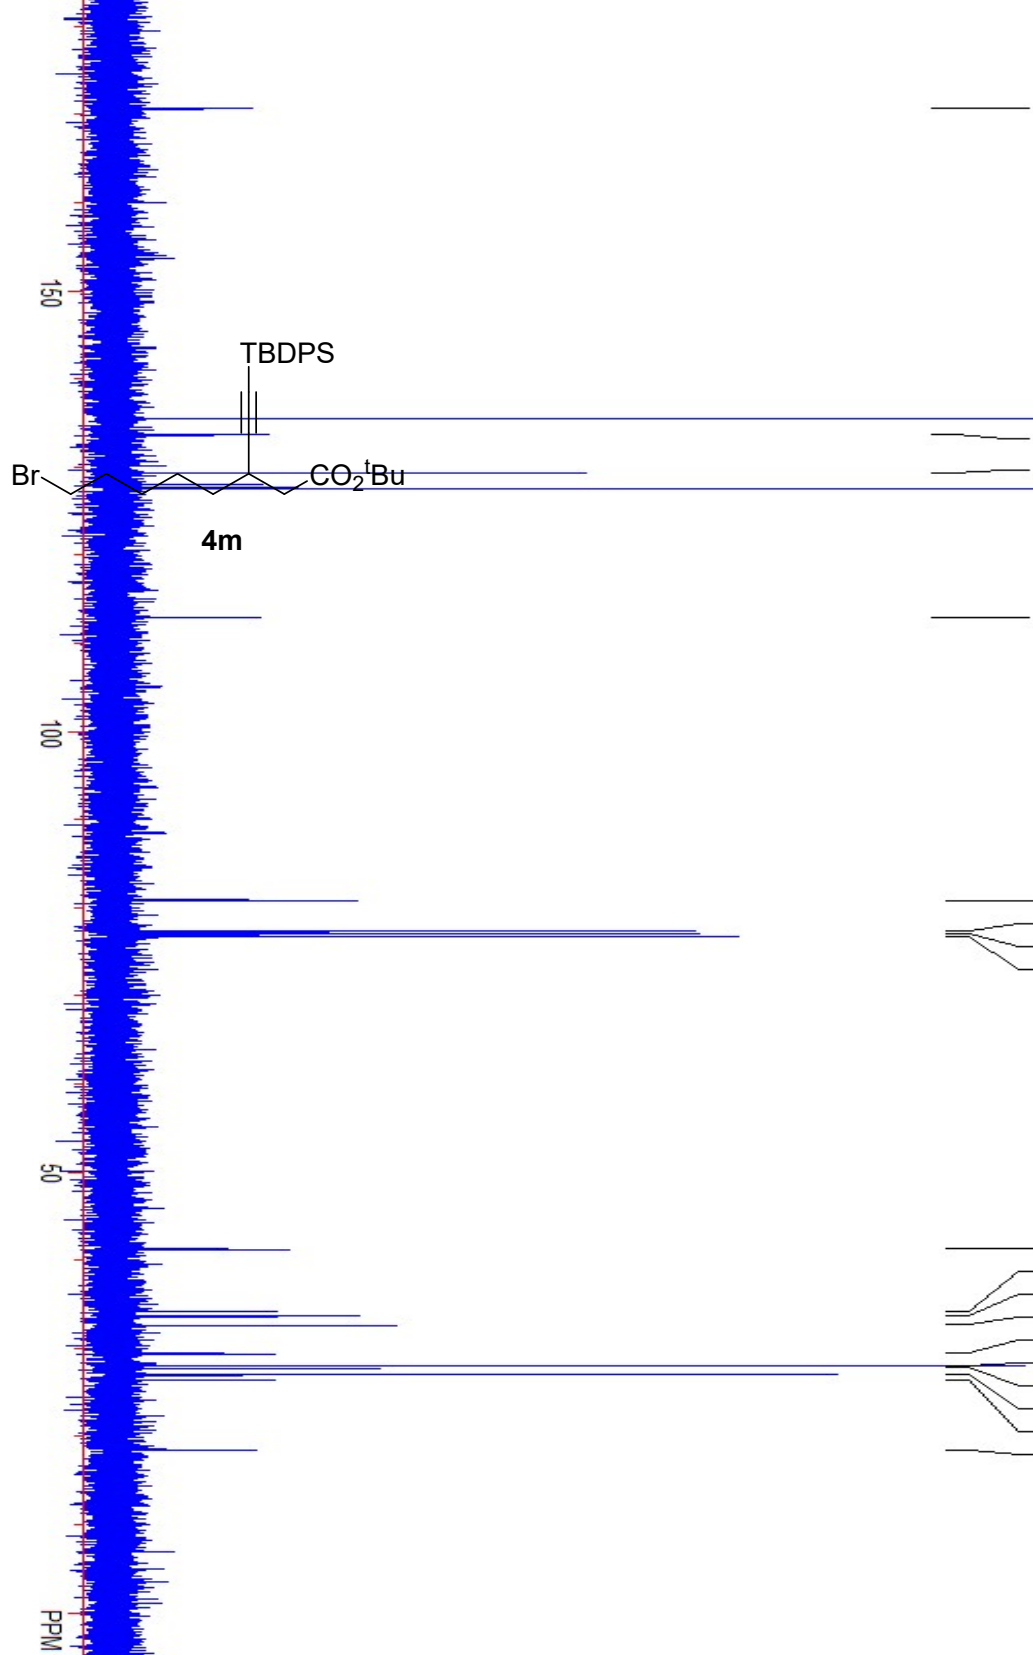

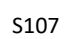

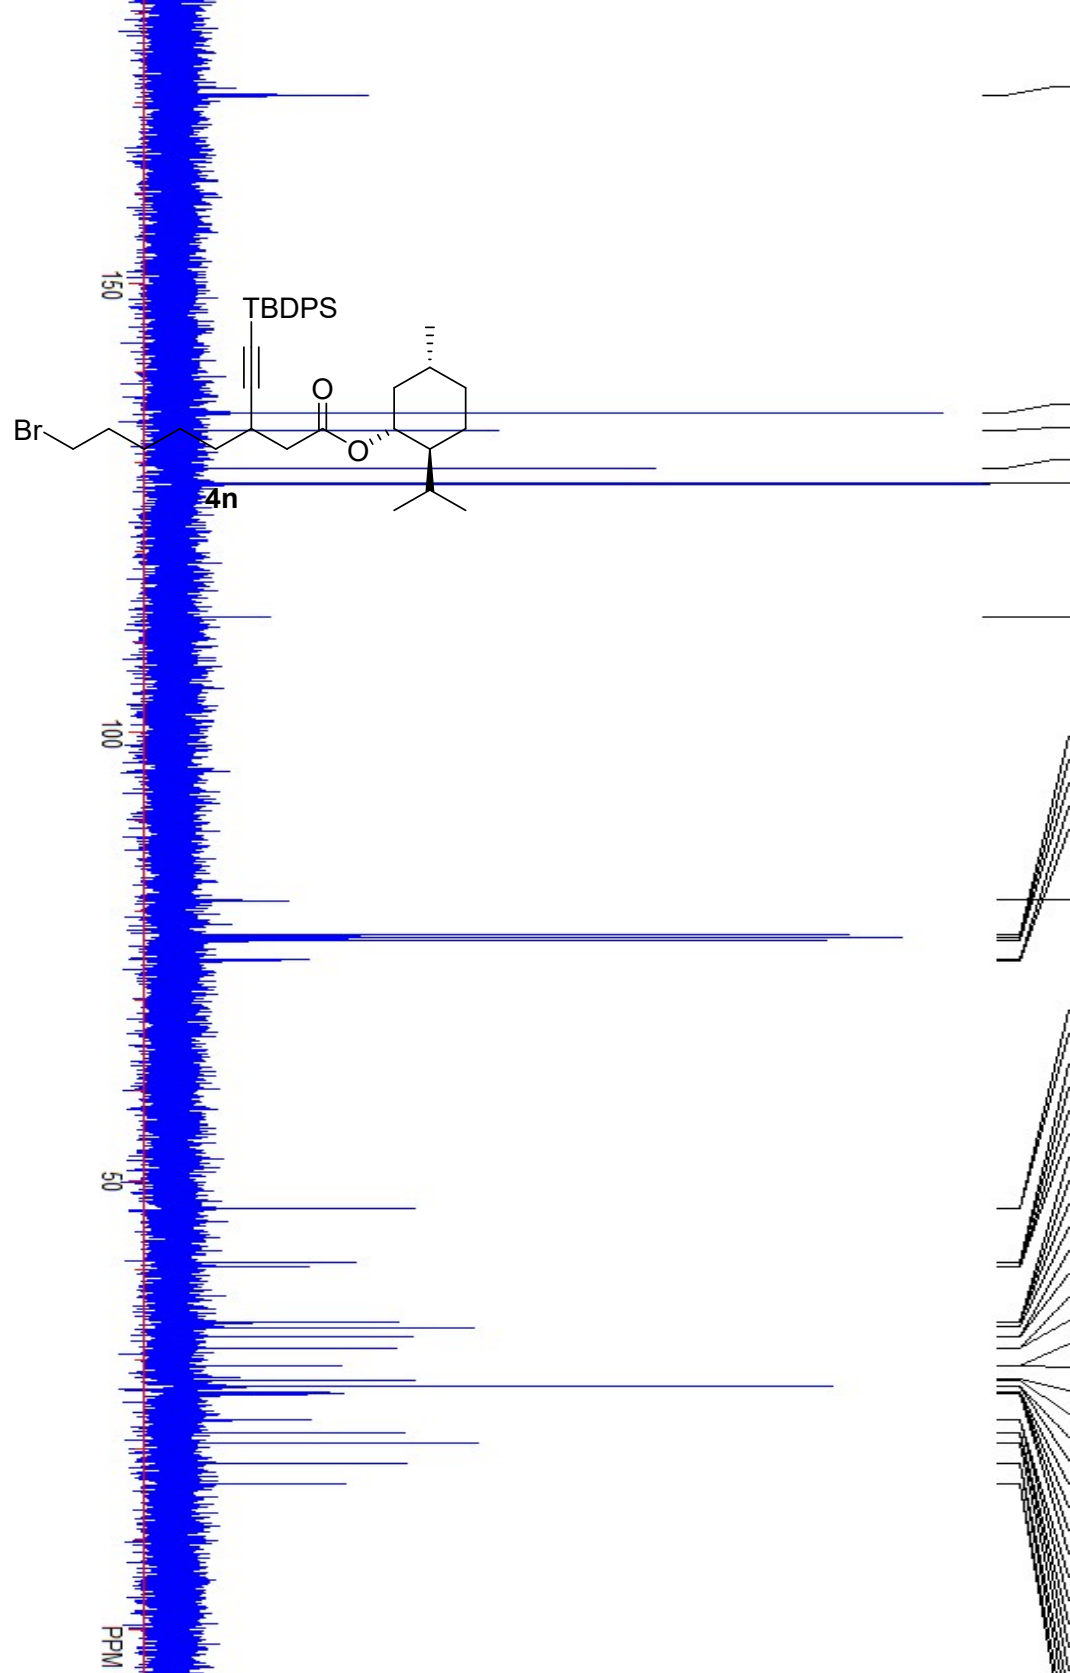

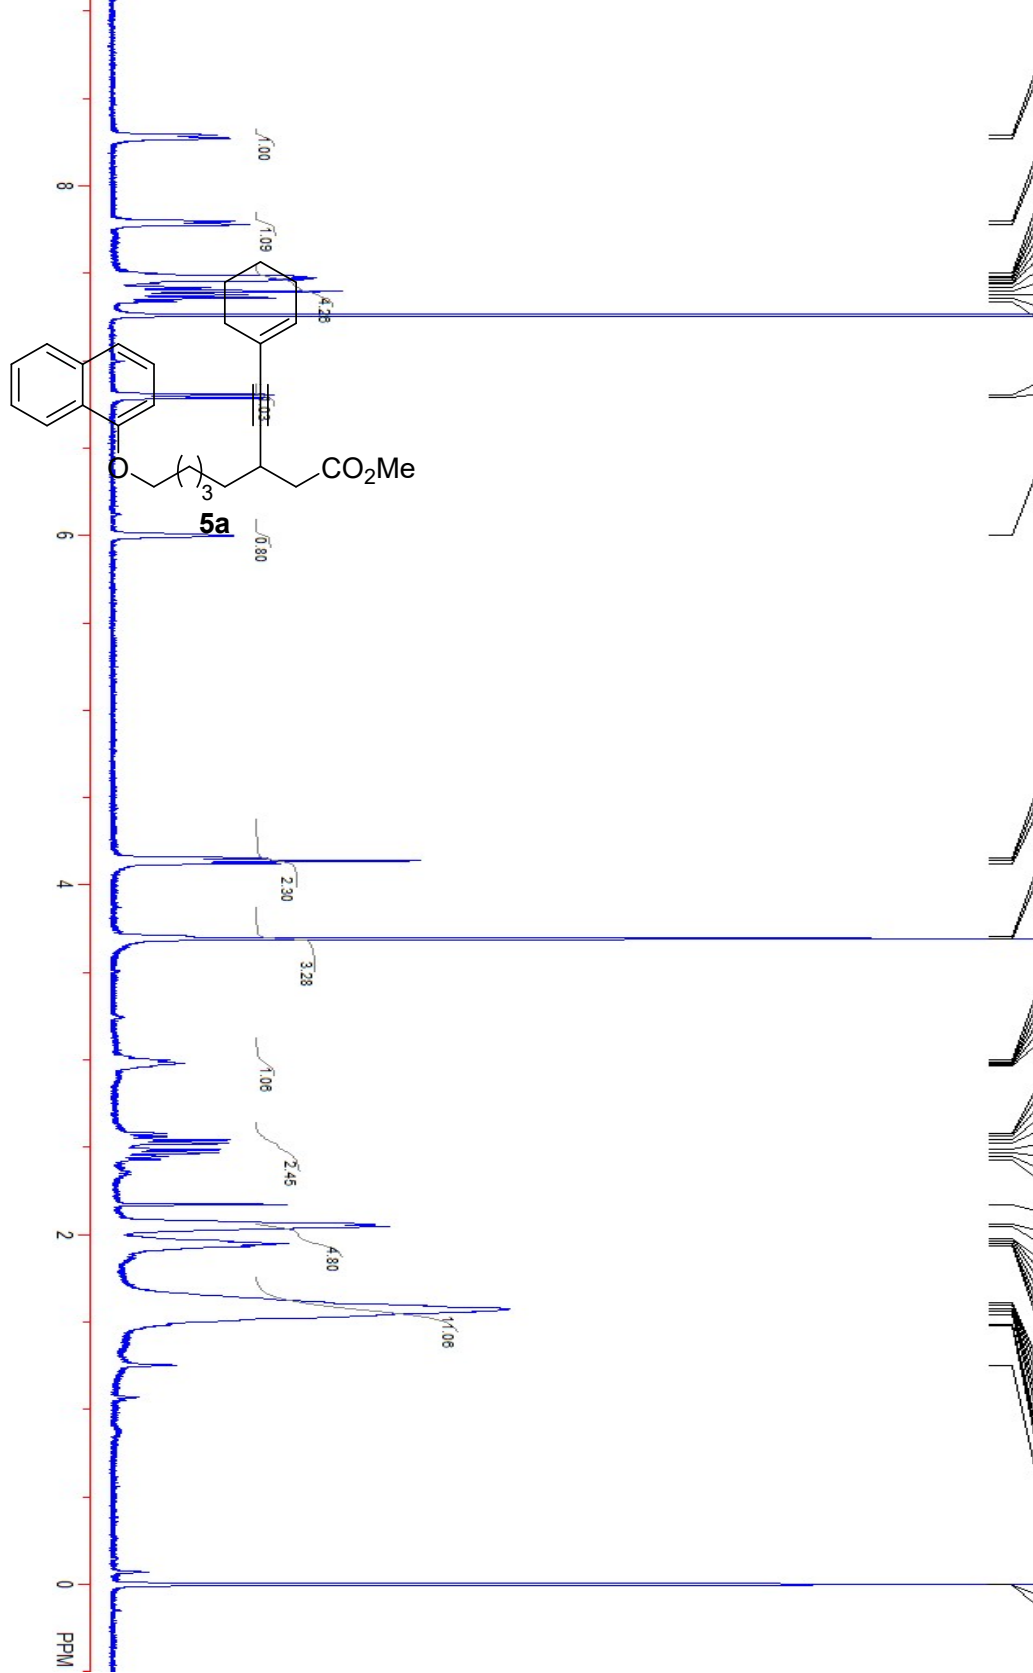

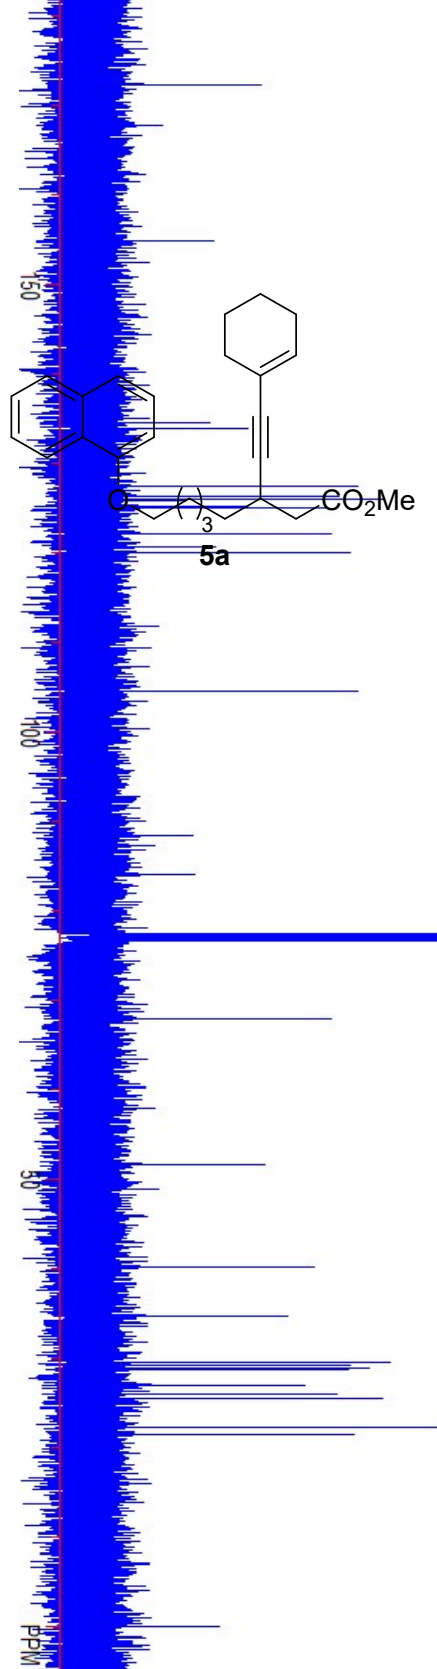

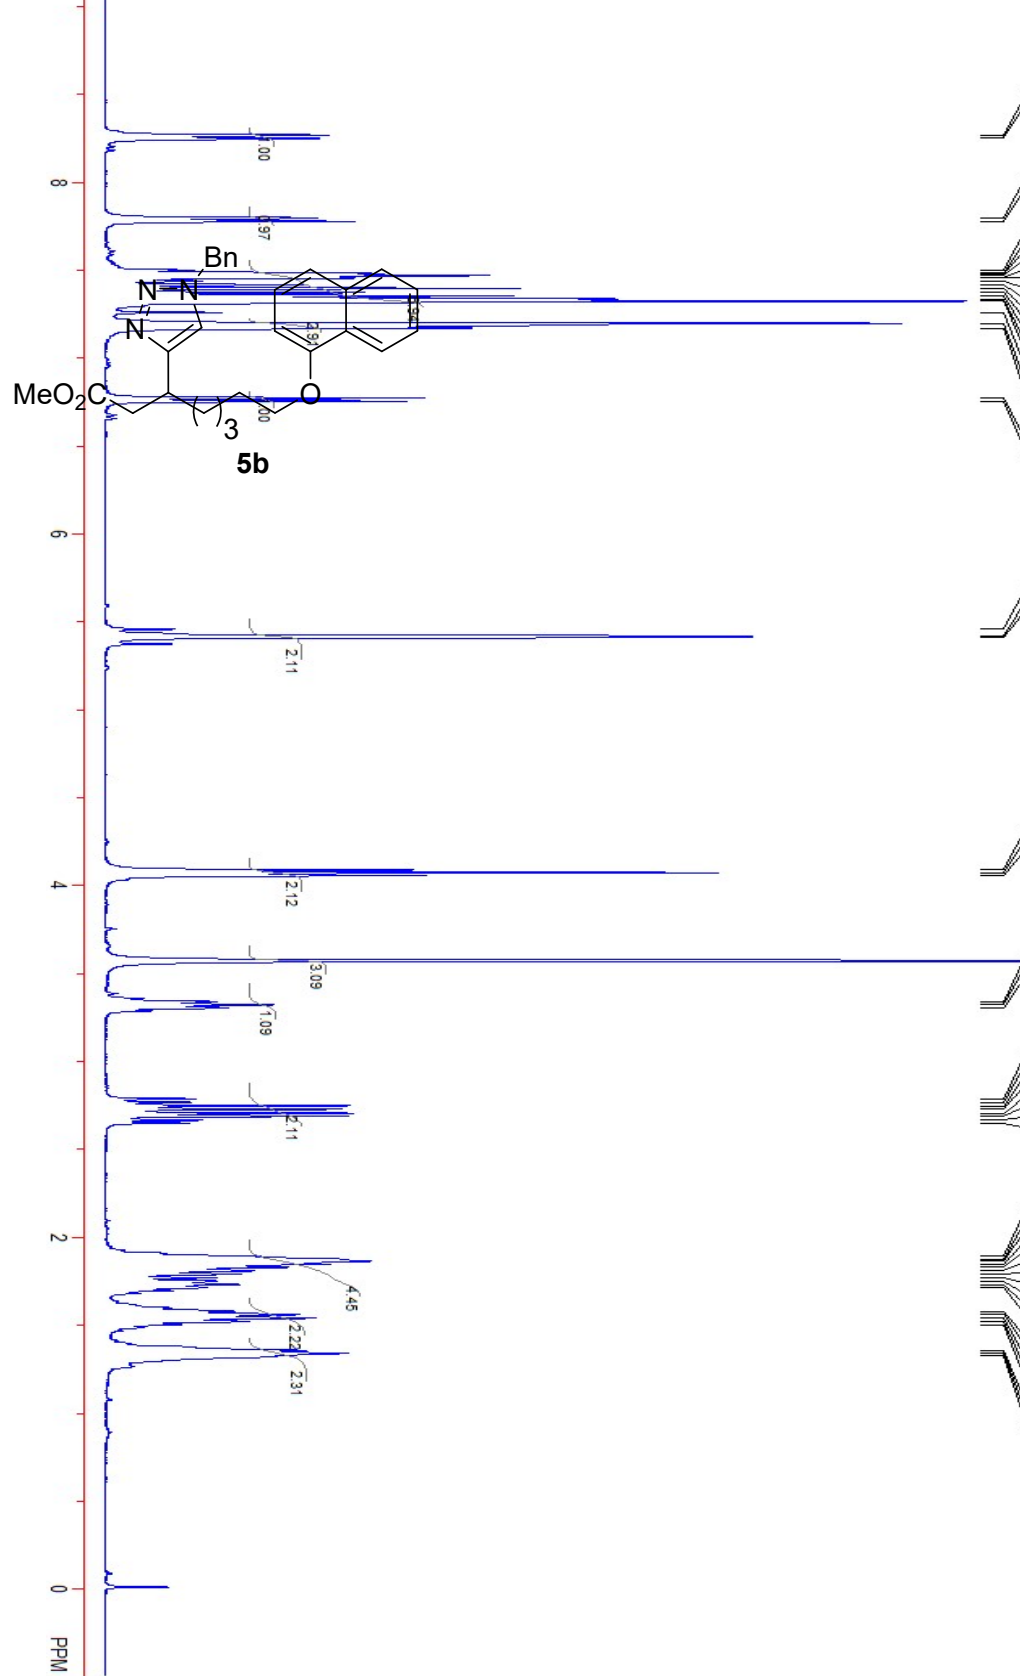

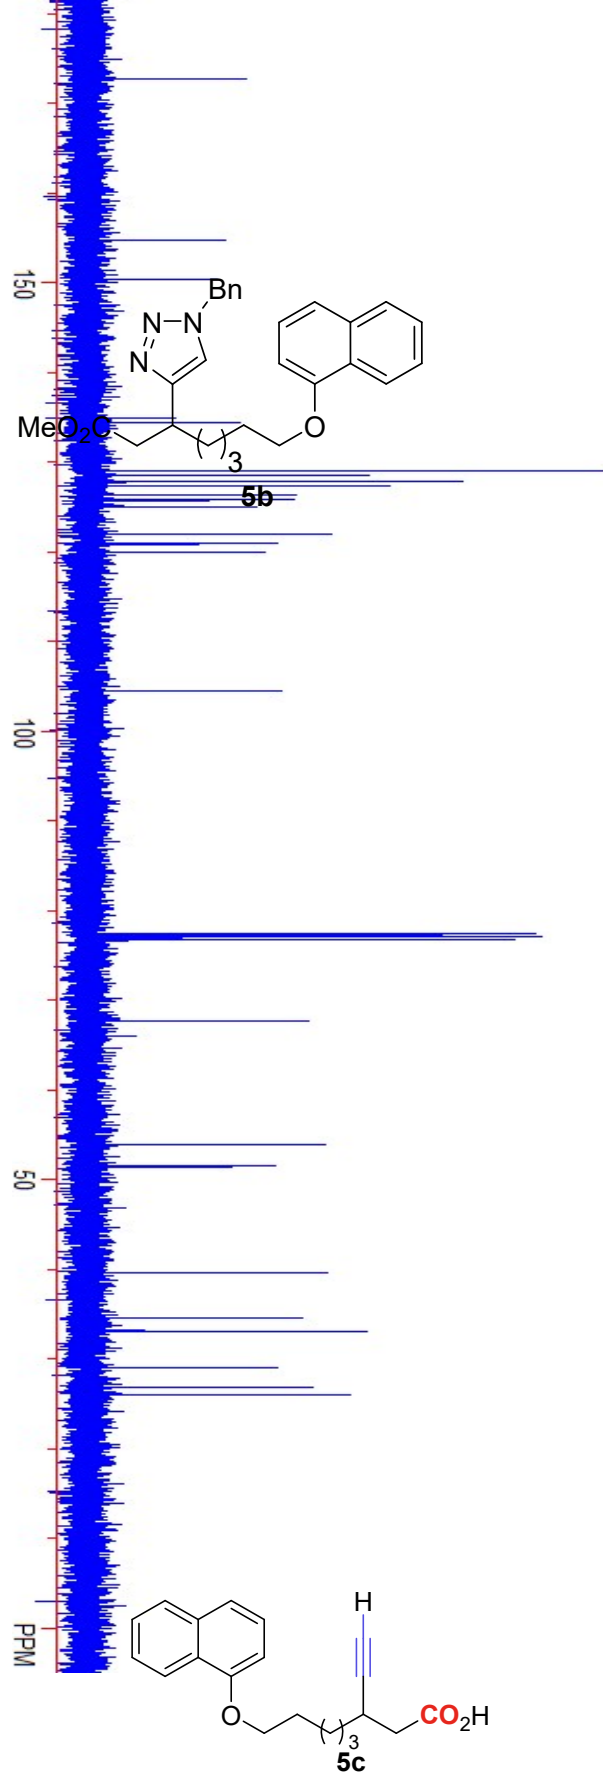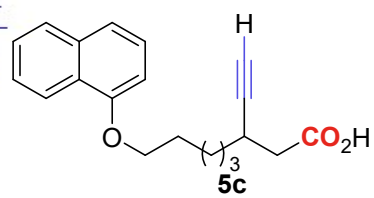

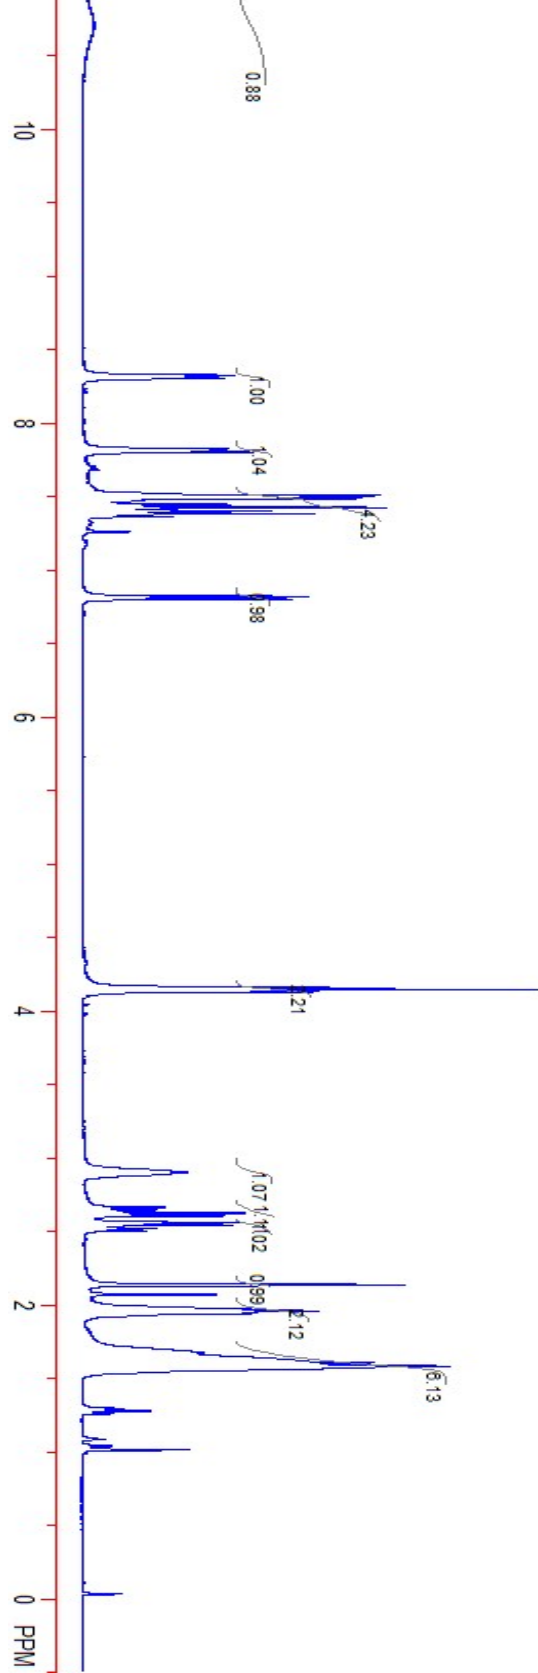

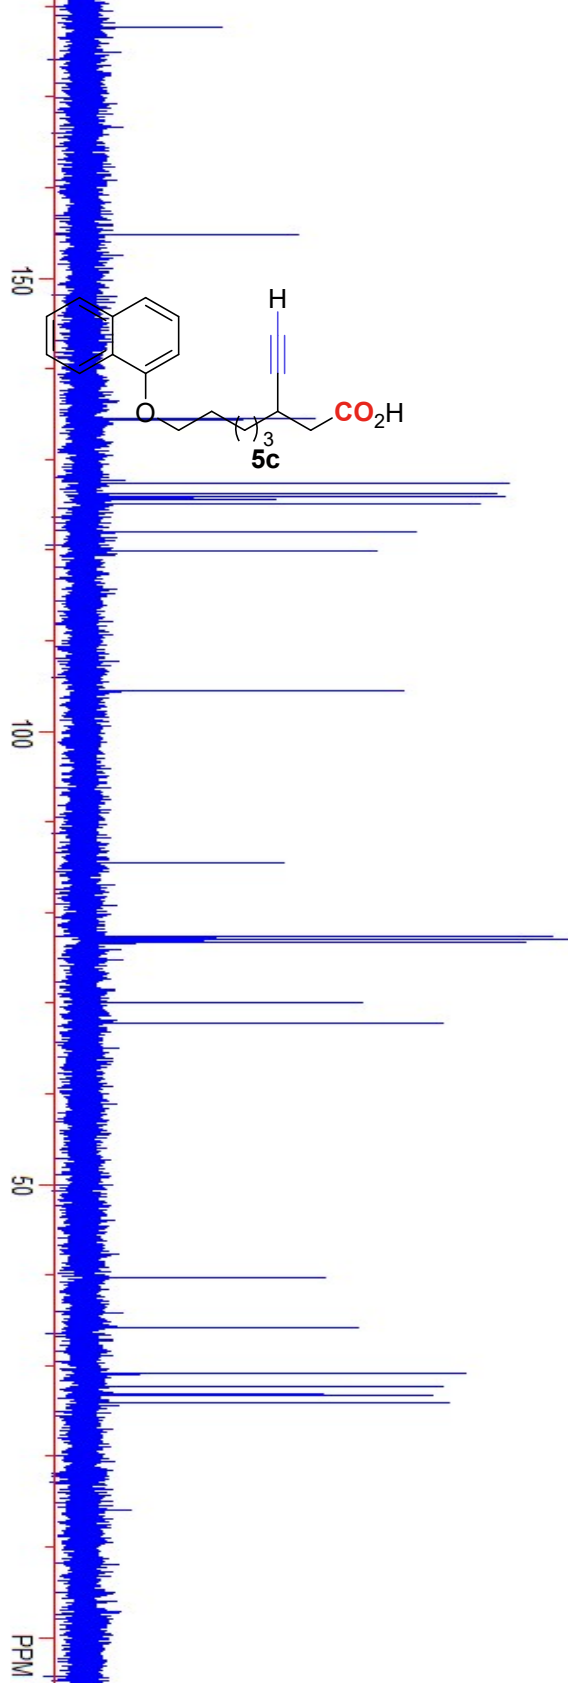

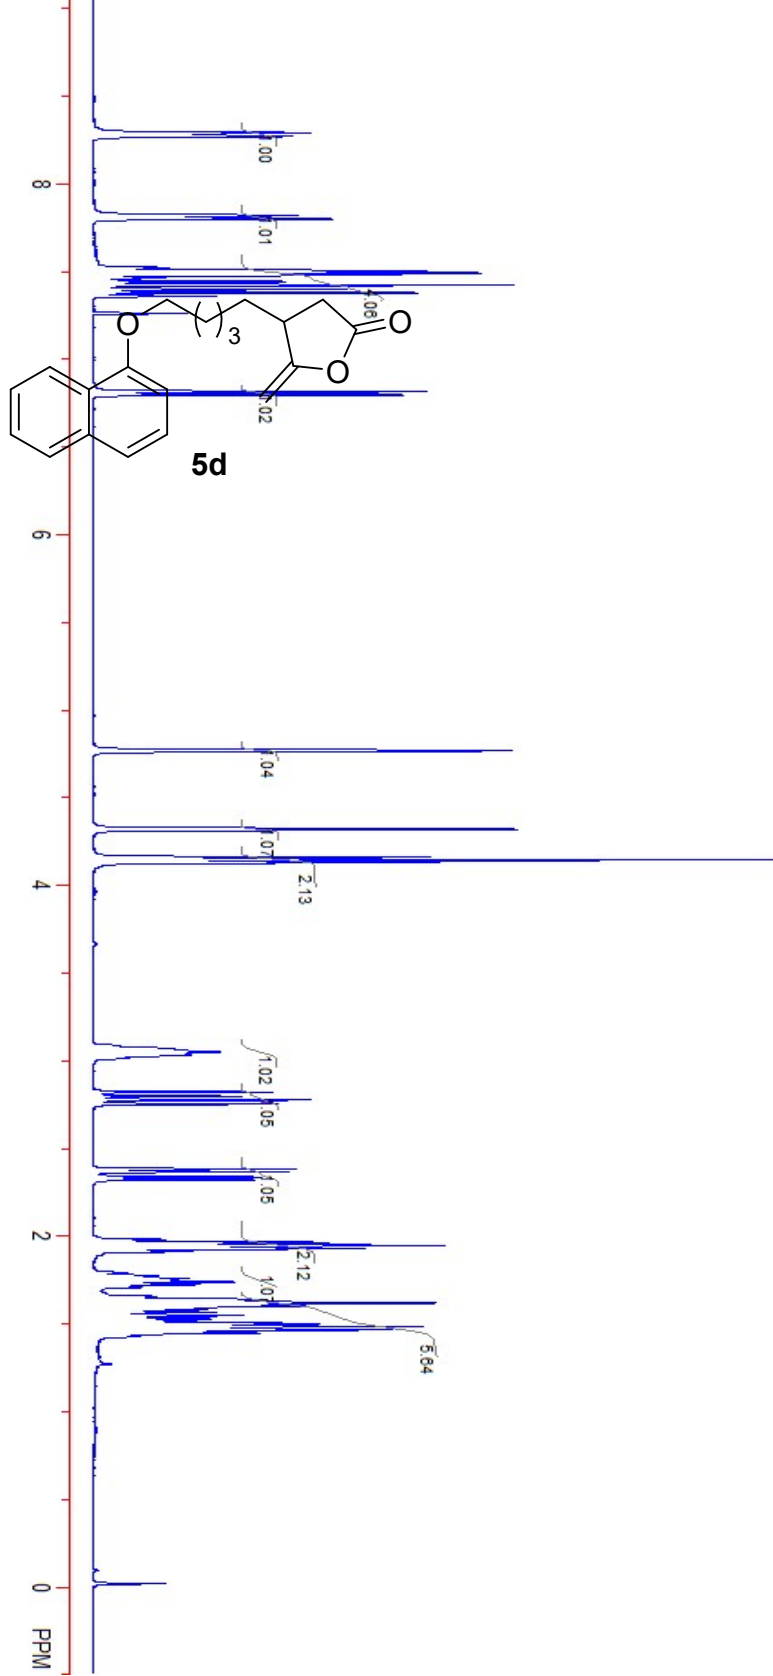

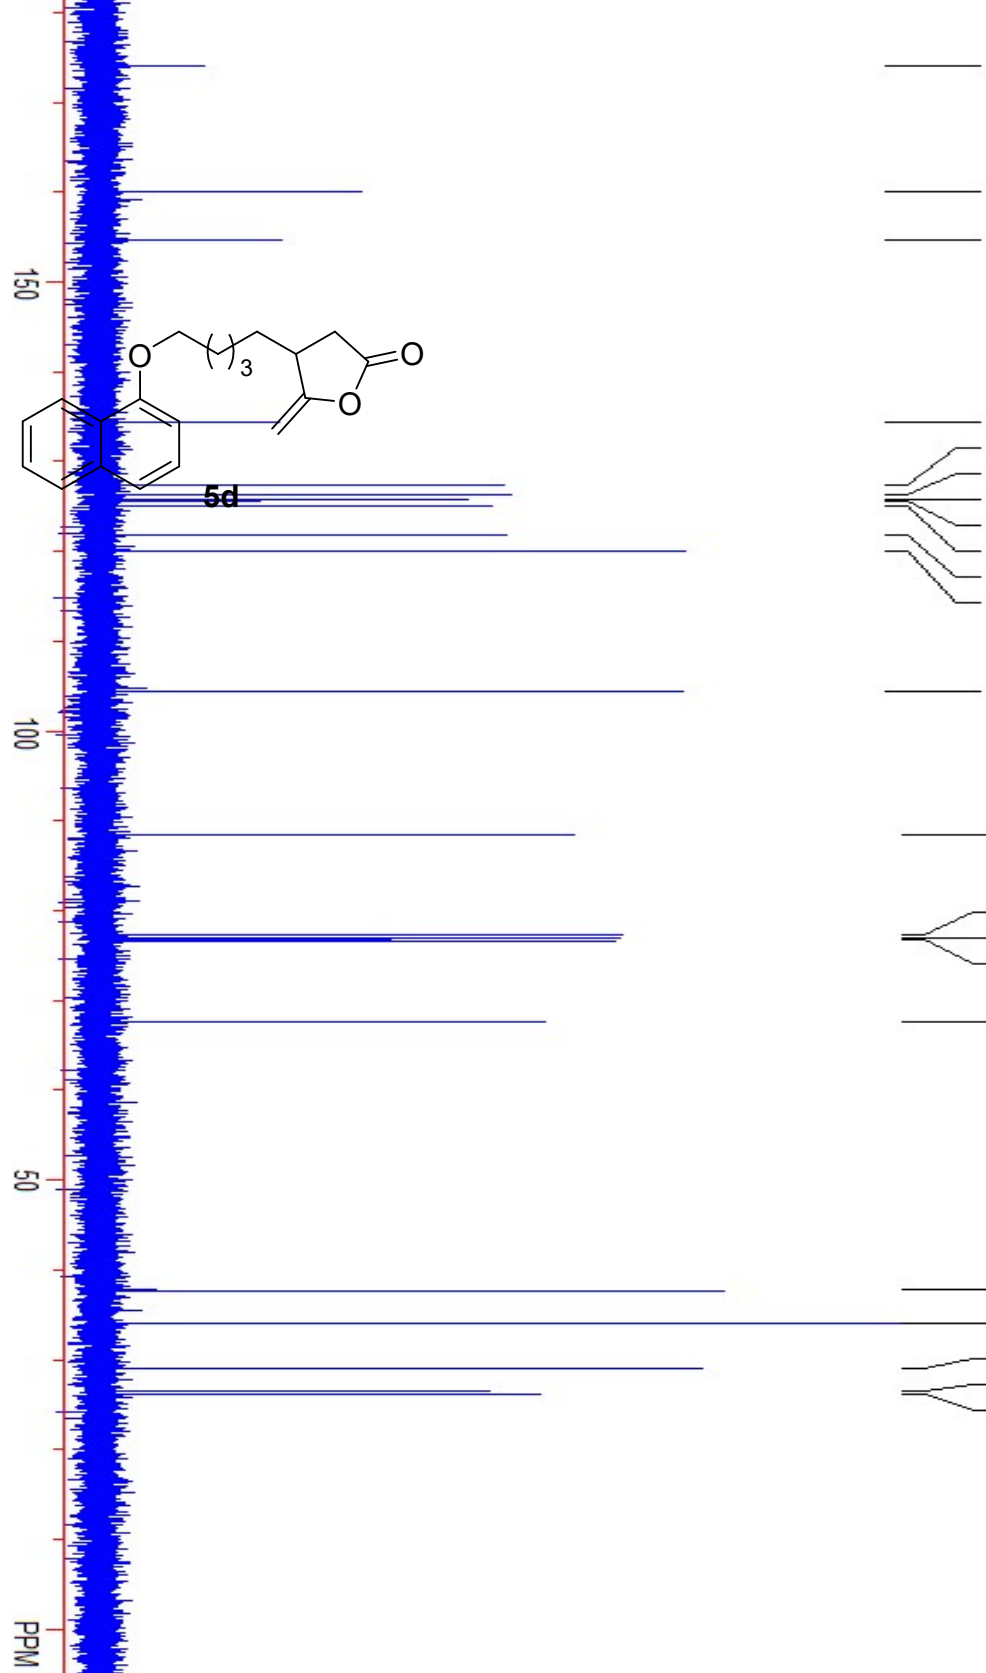

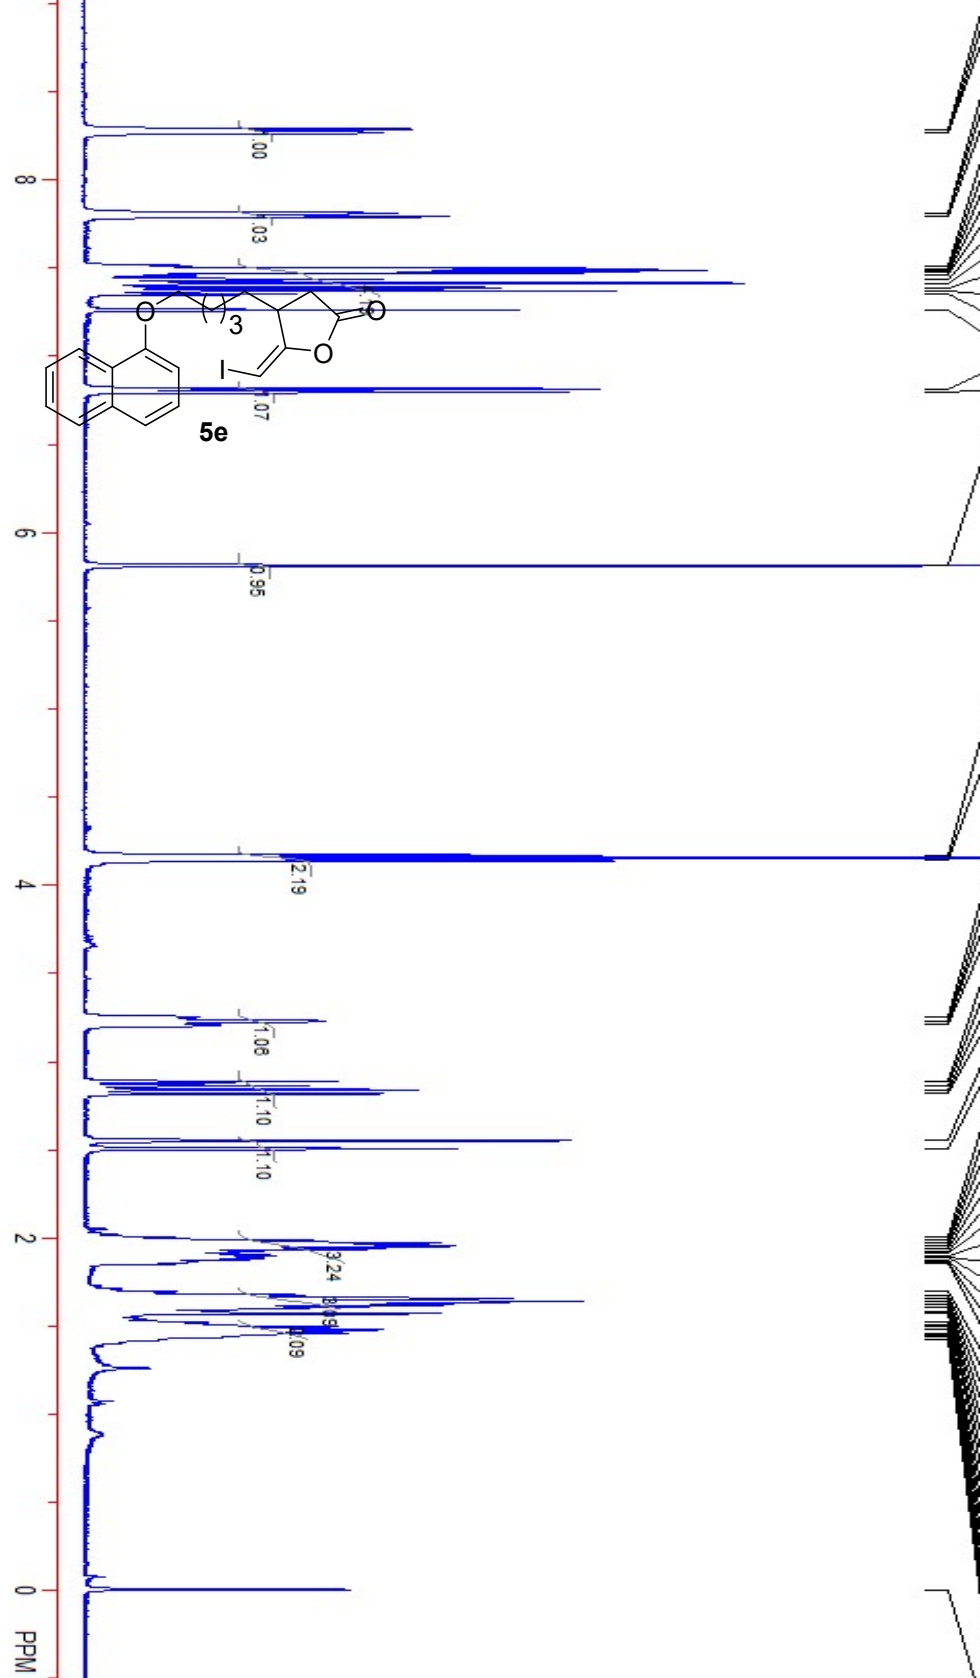

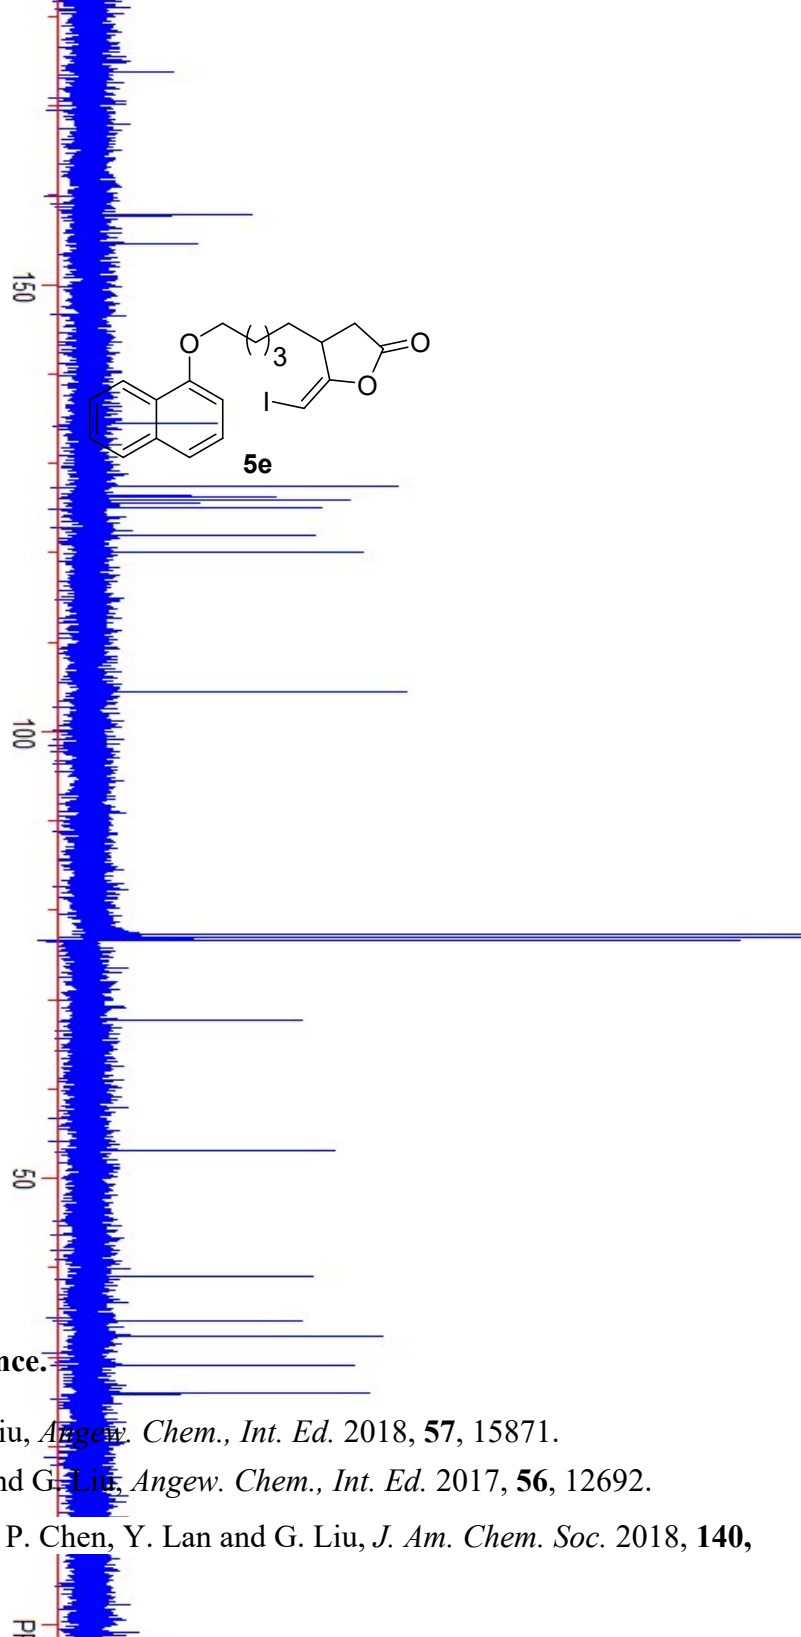

## 6. Supplementary reference.

- 1 X. Li, P. Chen and G. Liu, *Angew. Chem., Int. Ed.* 2018, **57**, 15871.
- 2 X. Qi, F. Yu, P. Chen and G. Liu, *Angew. Chem., Int. Ed.* 2017, **56**, 12692.
- 3 C. Chen, Y. Luo, L. Fu, P. Chen, Y. Lan and G. Liu, *J. Am. Chem. Soc.* 2018, **140**, 1207.
- 4 J. P. Brand, C. Chevalley, R. Scopelliti and J. Waser, *Chem. Eur. J.* 2012, **18**, 5655.
- 5 P. Bertus and P. Pale, *Tetrahedron Lett.* 1996, **37**, 2019.
- 6 C. Menendez, S. Gau, C. Lherbet, F. Rodriguez, C. Inard, M. R. Pasca and M. Baltas, *Eur. J. Med. Chem.* 2011, **46**, 5524.
- 7 E. Tomás-Mendivil, P. Y. Toullec, J. Díez, S. Conejero, V. Michelet and V. Cadierno, *Org. Lett.* 2012, **14**, 2520.
- 8 G. A. Krafft, and J. A. Katzenellenbogen, *J. Am. Chem. Soc.* 1981, **103**, 5459.

- 9 L. Fu, S. Zhou, X. Wan, P. Chen and G. Liu, *J. Am. Chem. Soc.* 2018, **140**, 10965.
